# Supplementary material for: Structurally diverse triterpenes obtained from the fruits of Ziziphus jujuba Mill. as inflammation inhibitors by NF-κB signaling pathway
Source: Royal Society of Chemistry journal article supplement (doi:10.1039/d1fo00117e), 2021-01-01
Supplement: d1fo00117e1.pdf [file d1fo00117e1.pdf]

1 **Structurally diverse triterpenes obtained**  
2 **from the fruits of *Ziziphus jujuba* Mill. as**  
3 **inflammation inhibitors by NF-κB signaling**  
4 **pathway**

5  
6 **Jingya Ruan**<sup>1</sup>, **Fan Sun**<sup>1</sup>, **Mimi Hao**<sup>2</sup>, **Lifeng Han**<sup>1</sup>, **Haiyang Yu**<sup>2</sup>, **Fanyou Lin**<sup>3</sup>,  
7 **Lijuan Wang**<sup>3</sup>, **Guohao Cao**<sup>2</sup>, **Yi Zhang**<sup>1,2,\*</sup> and **Tao Wang**<sup>1,2,\*</sup>

8  
9 ***Affiliations:***

10 *<sup>a</sup> Tianjin State Key Laboratory of Modern Chinese Medicine, Tianjin University of*  
11 *Traditional Chinese Medicine, 312 Anshanxi Road, Nankai District, Tianjin, 300193,*  
12 *China*

13 *<sup>b</sup> Tianjin Key Laboratory of TCM Chemistry and Analysis, Institute of Traditional*  
14 *Chinese Medicine, Tianjin University of Traditional Chinese Medicine, 312 Anshanxi*  
15 *Road, Nankai District, Tianjin, 300193, China*

16 *<sup>c</sup> Xiangyu Group Inc., 30 Xiangyu Road, Economic and Technological Development*  
17 *District, 276023, Linyi city, Shandong, China*

18  
19 \*Corresponding author. Tel./Fax: +86 22 5959 6163. E-mail:

20 zhwwxzh@tjutcm.edu.cn (Y. Zhang); wangtao@tjutcm.edu.cn (T. Wang).

|    |                                                                                                                       |    |
|----|-----------------------------------------------------------------------------------------------------------------------|----|
| 22 | <b>Chart S1.</b> The extraction and isolation progress of triterpenes <b>1–29</b> from <i>Z. jujuba</i> .....         | 5  |
| 23 | <b>S1.</b> The <sup>1</sup> H and <sup>13</sup> C NMR data of compounds <b>1–29</b> .....                             | 6  |
| 24 | <b>Fig. S1.</b> <sup>1</sup> H NMR (600MHz, CD <sub>3</sub> OD) spectrum of compound <b>1</b> .....                   | 16 |
| 25 | <b>Fig. S2.</b> <sup>13</sup> C NMR (150MHz, CD <sub>3</sub> OD) spectrum of compound <b>1</b> .....                  | 16 |
| 26 | <b>Fig. S3.</b> The <sup>1</sup> H <sup>1</sup> H COSY (CD <sub>3</sub> OD) spectrum of compound <b>1</b> .....       | 17 |
| 27 | <b>Fig. S4.</b> The HSQC (CD <sub>3</sub> OD) spectrum of compound <b>1</b> .....                                     | 17 |
| 28 | <b>Fig. S5.</b> The HMBC (CD <sub>3</sub> OD) spectrum of compound <b>1</b> .....                                     | 18 |
| 29 | <b>Fig. S6.</b> The NOESY (CD <sub>3</sub> OD) spectrum of compound <b>1</b> .....                                    | 18 |
| 30 | <b>Fig. S7.</b> The ESI-Q-Orbitrap MS spectrum of compound <b>1</b> .....                                             | 19 |
| 31 | <b>Fig. S8.</b> <sup>1</sup> H NMR (600MHz, CDCl <sub>3</sub> ) spectrum of compound <b>2</b> .....                   | 20 |
| 32 | <b>Fig. S9.</b> <sup>13</sup> C NMR (150MHz, CDCl <sub>3</sub> ) spectrum of compound <b>2</b> .....                  | 20 |
| 33 | <b>Fig. S10.</b> The ESI-Q-Orbitrap MS spectrum of compound <b>2</b> .....                                            | 21 |
| 34 | <b>Fig. S11.</b> <sup>1</sup> H NMR (600MHz, C <sub>5</sub> D <sub>5</sub> N) spectrum of compound <b>3</b> .....     | 22 |
| 35 | <b>Fig. S12.</b> <sup>13</sup> C NMR (150MHz, C <sub>5</sub> D <sub>5</sub> N) spectrum of compound <b>3</b> .....    | 22 |
| 36 | <b>Fig. S13.</b> The ESI-Q-Orbitrap MS spectrum of compound <b>3</b> .....                                            | 23 |
| 37 | <b>Fig. S14.</b> <sup>1</sup> H NMR (500MHz, C <sub>5</sub> D <sub>5</sub> N) spectrum of compound <b>4</b> .....     | 24 |
| 38 | <b>Fig. S15.</b> <sup>13</sup> C NMR (125MHz, C <sub>5</sub> D <sub>5</sub> N) spectrum of compound <b>4</b> .....    | 24 |
| 39 | <b>Fig. S16.</b> The ESI-Q-Orbitrap MS spectrum of compound <b>4</b> .....                                            | 25 |
| 40 | <b>Fig. S17.</b> <sup>1</sup> H NMR (500MHz, C <sub>5</sub> D <sub>5</sub> N) spectrum of compound <b>5</b> .....     | 26 |
| 41 | <b>Fig. S18.</b> <sup>13</sup> C NMR (125MHz, C <sub>5</sub> D <sub>5</sub> N) spectrum of compound <b>5</b> .....    | 26 |
| 42 | <b>Fig. S19.</b> The ESI-Q-Orbitrap MS spectrum of compound <b>5</b> .....                                            | 27 |
| 43 | <b>Fig. S20.</b> <sup>1</sup> H NMR (500MHz, C <sub>5</sub> D <sub>5</sub> N) spectrum of compound <b>6</b> .....     | 28 |
| 44 | <b>Fig. S21.</b> <sup>13</sup> C NMR (125MHz, C <sub>5</sub> D <sub>5</sub> N) spectrum of compound <b>6</b> .....    | 28 |
| 45 | <b>Fig. S22.</b> The ESI-Q-Orbitrap MS spectrum of compound <b>6</b> .....                                            | 29 |
| 46 | <b>Fig. S23.</b> <sup>1</sup> H NMR (600MHz, C <sub>5</sub> D <sub>5</sub> N) spectrum of compound <b>7</b> .....     | 30 |
| 47 | <b>Fig. S24.</b> <sup>13</sup> C NMR (150MHz, C <sub>5</sub> D <sub>5</sub> N) spectrum of compound <b>7</b> .....    | 30 |
| 48 | <b>Fig. S25.</b> The ESI-Q-Orbitrap MS spectrum of compound <b>7</b> .....                                            | 31 |
| 49 | <b>Fig. S26.</b> <sup>1</sup> H NMR (600MHz, C <sub>5</sub> D <sub>5</sub> N) spectrum of compound <b>8</b> .....     | 32 |
| 50 | <b>Fig. S27.</b> <sup>13</sup> C NMR (150MHz, C <sub>5</sub> D <sub>5</sub> N) spectrum of compound <b>8</b> .....    | 32 |
| 51 | <b>Fig. S28.</b> The ESI-Q-Orbitrap MS spectrum of compound <b>8</b> .....                                            | 33 |
| 52 | <b>Fig. S29.</b> <sup>1</sup> H NMR (600MHz, C <sub>5</sub> D <sub>5</sub> N) spectrum of compound <b>9</b> .....     | 34 |
| 53 | <b>Fig. S30.</b> <sup>13</sup> C NMR (150MHz, C <sub>5</sub> D <sub>5</sub> N) spectrum of compound <b>9</b> .....    | 34 |
| 54 | <b>Fig. S31.</b> The ESI-Q-Orbitrap MS spectrum of compound <b>9</b> .....                                            | 35 |
| 55 | <b>Fig. S32.</b> <sup>1</sup> H NMR (600MHz, C <sub>5</sub> D <sub>5</sub> N) spectrum of compound <b>10</b> .....    | 36 |
| 56 | <b>Fig. S33.</b> <sup>13</sup> C NMR (150MHz, C <sub>5</sub> D <sub>5</sub> N) spectrum-1 of compound <b>10</b> ..... | 36 |
| 57 | <b>Fig. S34.</b> <sup>13</sup> C NMR (150MHz, C <sub>5</sub> D <sub>5</sub> N) spectrum-2 of compound <b>10</b> ..... | 37 |
| 58 | <b>Fig. S35.</b> The ESI-Q-Orbitrap MS spectrum of compound <b>10</b> .....                                           | 37 |
| 59 | <b>Fig. S36.</b> <sup>1</sup> H NMR (500MHz, C <sub>5</sub> D <sub>5</sub> N) spectrum of compound <b>11</b> .....    | 38 |
| 60 | <b>Fig. S37.</b> <sup>13</sup> C NMR (125MHz, C <sub>5</sub> D <sub>5</sub> N) spectrum of compound <b>11</b> .....   | 38 |
| 61 | <b>Fig. S38.</b> The ESI-Q-Orbitrap MS spectrum of compound <b>11</b> .....                                           | 39 |
| 62 | <b>Fig. S39.</b> <sup>1</sup> H NMR (600MHz, C <sub>5</sub> D <sub>5</sub> N) spectrum of compound <b>12</b> .....    | 40 |
| 63 | <b>Fig. S40.</b> <sup>13</sup> C NMR (150MHz, C <sub>5</sub> D <sub>5</sub> N) spectrum-1 of compound <b>12</b> ..... | 40 |
| 64 | <b>Fig. S41.</b> <sup>13</sup> C NMR (150MHz, C <sub>5</sub> D <sub>5</sub> N) spectrum-2 of compound <b>12</b> ..... | 41 |
| 65 | <b>Fig. S42.</b> The ESI-Q-Orbitrap MS spectrum of compound <b>12</b> .....                                           | 41 |

|     |                                                                                                                       |    |
|-----|-----------------------------------------------------------------------------------------------------------------------|----|
| 66  | <b>Fig. S43.</b> $^1\text{H}$ NMR (500MHz, $\text{C}_5\text{D}_5\text{N}$ ) spectrum of compound <b>13</b> .....      | 42 |
| 67  | <b>Fig. S44.</b> $^{13}\text{C}$ NMR (125MHz, $\text{C}_5\text{D}_5\text{N}$ ) spectrum of compound <b>13</b> .....   | 42 |
| 68  | <b>Fig. S45.</b> The ESI-Q-Orbitrap MS spectrum of compound <b>13</b> .....                                           | 43 |
| 69  | <b>Fig. S46.</b> $^1\text{H}$ NMR (600MHz, $\text{CD}_3\text{OD}$ ) spectrum of compound <b>14</b> .....              | 44 |
| 70  | <b>Fig. S47.</b> $^{13}\text{C}$ NMR (150MHz, $\text{CD}_3\text{OD}$ ) spectrum of compound <b>14</b> .....           | 44 |
| 71  | <b>Fig. S48.</b> The ESI-Q-Orbitrap MS spectrum of compound <b>14</b> .....                                           | 45 |
| 72  | <b>Fig. S49.</b> $^1\text{H}$ NMR (600MHz, $\text{DMSO-}d_6$ ) spectrum of compound <b>15</b> .....                   | 46 |
| 73  | <b>Fig. S50.</b> $^{13}\text{C}$ NMR (150MHz, $\text{DMSO-}d_6$ ) spectrum of compound <b>15</b> .....                | 46 |
| 74  | <b>Fig. S51.</b> The ESI-Q-Orbitrap MS spectrum of compound <b>15</b> .....                                           | 47 |
| 75  | <b>Fig. S52.</b> $^1\text{H}$ NMR (600MHz, $\text{DMSO-}d_6$ ) spectrum of compound <b>16</b> .....                   | 48 |
| 76  | <b>Fig. S53.</b> $^{13}\text{C}$ NMR (150MHz, $\text{DMSO-}d_6$ ) spectrum of compound <b>16</b> .....                | 48 |
| 77  | <b>Fig. S54.</b> The ESI-Q-Orbitrap MS spectrum of compound <b>16</b> .....                                           | 49 |
| 78  | <b>Fig. S55.</b> $^1\text{H}$ NMR (600MHz, $\text{C}_5\text{D}_5\text{N}$ ) spectrum of compound <b>17</b> .....      | 50 |
| 79  | <b>Fig. S56.</b> $^{13}\text{C}$ NMR (150MHz, $\text{C}_5\text{D}_5\text{N}$ ) spectrum of compound <b>17</b> .....   | 50 |
| 80  | <b>Fig. S57.</b> The ESI-Q-Orbitrap MS spectrum of compound <b>17</b> .....                                           | 51 |
| 81  | <b>Fig. S58.</b> $^1\text{H}$ NMR (600MHz, $\text{C}_5\text{D}_5\text{N}$ ) spectrum of compound <b>18</b> .....      | 52 |
| 82  | <b>Fig. S59.</b> $^{13}\text{C}$ NMR (150MHz, $\text{C}_5\text{D}_5\text{N}$ ) spectrum-1 of compound <b>18</b> ..... | 52 |
| 83  | <b>Fig. S60.</b> $^{13}\text{C}$ NMR (150MHz, $\text{C}_5\text{D}_5\text{N}$ ) spectrum-2 of compound <b>18</b> ..... | 53 |
| 84  | <b>Fig. S61.</b> The ESI-Q-Orbitrap MS spectrum of compound <b>18</b> .....                                           | 53 |
| 85  | <b>Fig. S62.</b> $^1\text{H}$ NMR (600MHz, $\text{C}_5\text{D}_5\text{N}$ ) spectrum of compound <b>19</b> .....      | 54 |
| 86  | <b>Fig. S63.</b> $^{13}\text{C}$ NMR (150MHz, $\text{C}_5\text{D}_5\text{N}$ ) spectrum of compound <b>19</b> .....   | 54 |
| 87  | <b>Fig. S64.</b> The ESI-Q-Orbitrap MS spectrum of compound <b>19</b> .....                                           | 55 |
| 88  | <b>Fig. S65.</b> $^1\text{H}$ NMR (600MHz, $\text{C}_5\text{D}_5\text{N}$ ) spectrum of compound <b>20</b> .....      | 56 |
| 89  | <b>Fig. S66.</b> $^{13}\text{C}$ NMR (150MHz, $\text{C}_5\text{D}_5\text{N}$ ) spectrum of compound <b>20</b> .....   | 56 |
| 90  | <b>Fig. S67.</b> The ESI-Q-Orbitrap MS spectrum of compound <b>20</b> .....                                           | 57 |
| 91  | <b>Fig. S68.</b> $^1\text{H}$ NMR (500MHz, $\text{C}_5\text{D}_5\text{N}$ ) spectrum of compound <b>21</b> .....      | 58 |
| 92  | <b>Fig. S69.</b> $^{13}\text{C}$ NMR (125MHz, $\text{C}_5\text{D}_5\text{N}$ ) spectrum of compound <b>21</b> .....   | 58 |
| 93  | <b>Fig. S70.</b> The ESI-Q-Orbitrap MS spectrum of compound <b>21</b> .....                                           | 59 |
| 94  | <b>Fig. S71.</b> $^1\text{H}$ NMR (500MHz, $\text{C}_5\text{D}_5\text{N}$ ) spectrum of compound <b>22</b> .....      | 60 |
| 95  | <b>Fig. S72.</b> $^{13}\text{C}$ NMR (125MHz, $\text{C}_5\text{D}_5\text{N}$ ) spectrum of compound <b>22</b> .....   | 60 |
| 96  | <b>Fig. S73.</b> The ESI-Q-Orbitrap MS spectrum of compound <b>22</b> .....                                           | 61 |
| 97  | <b>Fig. S74.</b> $^1\text{H}$ NMR (600MHz, $\text{C}_5\text{D}_5\text{N}$ ) spectrum of compound <b>23</b> .....      | 62 |
| 98  | <b>Fig. S75.</b> $^{13}\text{C}$ NMR (150MHz, $\text{C}_5\text{D}_5\text{N}$ ) spectrum-1 of compound <b>23</b> ..... | 62 |
| 99  | <b>Fig. S76.</b> $^{13}\text{C}$ NMR (150MHz, $\text{C}_5\text{D}_5\text{N}$ ) spectrum-2 of compound <b>23</b> ..... | 63 |
| 100 | <b>Fig. S77.</b> The ESI-Q-Orbitrap MS spectrum of compound <b>23</b> .....                                           | 63 |
| 101 | <b>Fig. S78.</b> $^1\text{H}$ NMR (600MHz, $\text{C}_5\text{D}_5\text{N}$ ) spectrum of compound <b>24</b> .....      | 64 |
| 102 | <b>Fig. S79.</b> $^{13}\text{C}$ NMR (150MHz, $\text{C}_5\text{D}_5\text{N}$ ) spectrum-1 of compound <b>24</b> ..... | 64 |
| 103 | <b>Fig. S80.</b> The ESI-Q-Orbitrap MS spectrum of compound <b>24</b> .....                                           | 65 |
| 104 | <b>Fig. S81.</b> $^1\text{H}$ NMR (600MHz, $\text{C}_5\text{D}_5\text{N}$ ) spectrum of compound <b>25</b> .....      | 66 |
| 105 | <b>Fig. S82.</b> $^{13}\text{C}$ NMR (150MHz, $\text{C}_5\text{D}_5\text{N}$ ) spectrum of compound <b>25</b> .....   | 66 |
| 106 | <b>Fig. S83.</b> The ESI-Q-Orbitrap MS spectrum of compound <b>25</b> .....                                           | 67 |
| 107 | <b>Fig. S84.</b> $^1\text{H}$ NMR (600MHz, $\text{C}_5\text{D}_5\text{N}$ ) spectrum of compound <b>26</b> .....      | 68 |
| 108 | <b>Fig. S85.</b> $^{13}\text{C}$ NMR (150MHz, $\text{C}_5\text{D}_5\text{N}$ ) spectrum-1 of compound <b>26</b> ..... | 68 |
| 109 | <b>Fig. S86.</b> $^{13}\text{C}$ NMR (150MHz, $\text{C}_5\text{D}_5\text{N}$ ) spectrum-2 of compound <b>26</b> ..... | 69 |

|     |                                                                                                                       |    |
|-----|-----------------------------------------------------------------------------------------------------------------------|----|
| 110 | <b>Fig. S87.</b> The ESI-Q-Orbitrap MS spectrum of compound <b>26</b> .....                                           | 69 |
| 111 | <b>Fig. S88.</b> <sup>1</sup> H NMR (500MHz, C <sub>5</sub> D <sub>5</sub> N) spectrum of compound <b>27</b> .....    | 70 |
| 112 | <b>Fig. S89.</b> <sup>13</sup> C NMR (125MHz, C <sub>5</sub> D <sub>5</sub> N) spectrum of compound <b>27</b> .....   | 70 |
| 113 | <b>Fig. S90.</b> The ESI-Q-Orbitrap MS spectrum of compound <b>27</b> .....                                           | 71 |
| 114 | <b>Fig. S91.</b> <sup>1</sup> H NMR (500MHz, C <sub>5</sub> D <sub>5</sub> N) spectrum of compound <b>28</b> .....    | 72 |
| 115 | <b>Fig. S92.</b> <sup>13</sup> C NMR (125MHz, C <sub>5</sub> D <sub>5</sub> N) spectrum of compound <b>28</b> .....   | 72 |
| 116 | <b>Fig. S93.</b> The ESI-Q-Orbitrap MS spectrum of compound <b>28</b> .....                                           | 73 |
| 117 | <b>Fig. S94.</b> <sup>1</sup> H NMR (600MHz, C <sub>5</sub> D <sub>5</sub> N) spectrum of compound <b>29</b> .....    | 74 |
| 118 | <b>Fig. S95.</b> <sup>13</sup> C NMR (150MHz, C <sub>5</sub> D <sub>5</sub> N) spectrum-1 of compound <b>29</b> ..... | 74 |
| 119 | <b>Fig. S96.</b> <sup>13</sup> C NMR (150MHz, C <sub>5</sub> D <sub>5</sub> N) spectrum-2 of compound <b>29</b> ..... | 75 |
| 120 | <b>Fig. S97.</b> The ESI-Q-Orbitrap MS spectrum of compound <b>29</b> .....                                           | 75 |
| 121 | <b>Fig. S98.</b> The MTT assay compounds <b>1–29</b> at 1, 5, 10, 25 and 50 μM .....                                  | 76 |
| 122 | <b>Fig. S99.</b> The raw data of Fig. 3.....                                                                          | 77 |
| 123 | <b>Tab. S1.</b> <sup>13</sup> C-NMR data for <b>2–11</b> .....                                                        | 78 |
| 124 | <b>Tab. S2.</b> <sup>13</sup> C-NMR data for <b>12–20</b> .....                                                       | 79 |
| 125 | <b>Tab. S3.</b> <sup>13</sup> C-NMR data for <b>21–29</b> .....                                                       | 80 |
| 126 | <b>Tab. S4.</b> Comparison <sup>1</sup> H and <sup>13</sup> C NMR chemical shifts of maslinic acid, augustic acid,    |    |
| 127 | bredemolic acid and 3- <i>epi</i> -maslinic acid.....                                                                 | 81 |



132 **S1. The NMR data of compounds 2–29**

133

134 *Lup-20 (29)-en-3-on-28-oic acid (2, purity percentage is 98.3%):* White powder;

135 <sup>1</sup>H NMR (CDCl<sub>3</sub>, 500 MHz) spectroscopic data:  $\delta$  0.92, 0.99, 0.99, 1.02, 1.07, 1.70

136 (3H each, all s, H<sub>3</sub>-26, 25, 27, 24, 23 and 29), 4.61, 4.75 (1H each, both br. s, H<sub>2</sub>-30);

137 <sup>13</sup>C NMR (CDCl<sub>3</sub>, 125 MHz) spectroscopic data: see Tab. S1; ESI-Q-Orbitrap MS

138 *m/z* 453.33734 [M–H]<sup>–</sup> (calcd for C<sub>30</sub>H<sub>47</sub>O<sub>3</sub>, 453.33632).

139 *Betulinic acid (3, purity percentage is 99.5%):* White powder; <sup>1</sup>H NMR (C<sub>5</sub>D<sub>5</sub>N,

140 600 MHz) spectroscopic data:  $\delta$  0.84, 1.02, 1.07, 1.08, 1.23, 1.80 (3H each, all s, H<sub>3</sub>-

141 24, 25, 26, 27, 23 and 29), 3.46 (1H, t like, *ca.* *J* = 8 Hz, H-3), 4.78, 4.95 (1H each,

142 both br. s, H<sub>2</sub>-30); <sup>13</sup>C NMR (C<sub>5</sub>D<sub>5</sub>N, 150 MHz) spectroscopic data: see Tab. S1; ESI-

143 Q-Orbitrap MS *m/z* 455.35287 [M–H]<sup>–</sup> (calcd for C<sub>30</sub>H<sub>47</sub>O<sub>3</sub>, 455.35197); and

144 according to our identification, the chemical shift values of C-15 and C-21 in the

145 literature were exchanged.

146 *2 $\alpha$ -Hydroxybetulinic acid (4, purity percentage is 99.3%):* White powder; <sup>1</sup>H

147 NMR (C<sub>5</sub>D<sub>5</sub>N, 500 MHz) spectroscopic data:  $\delta$  0.91, 1.05, 1.05, 1.06, 1.25, 1.79 (3H

148 each, all s, H<sub>3</sub>-25, 24, 26, 27, 23 and 29), 3.38 (1H, d, *J* = 9.5 Hz, H-3), 4.08 (1H, dt, *J*

149 = 4.5, 9.5 Hz, H-2), 4.77, 4.93 (1H each, both br. s, H<sub>2</sub>-30); <sup>13</sup>C NMR (C<sub>5</sub>D<sub>5</sub>N, 125

150 MHz) spectroscopic data: see Tab. S1; ESI-Q-Orbitrap MS *m/z* 471.34763 [M–H]<sup>–</sup>

151 (calcd for C<sub>30</sub>H<sub>47</sub>O<sub>4</sub>, 471.34689); and according to our identification, the chemical

152 shift values of C-23 and C-27, C-25 and C-26 in the literature were exchanged.

153 *3 $\beta$ ,30-Dihydroxylup-20(29)-en-28-oic acid (5, purity percentage is 93.0%):*

154 White powder;  $^1\text{H}$  NMR (DMSO- $d_6$ , 500 MHz) spectroscopic data:  $\delta$  0.65, 0.76, 0.87,  
155 0.93, 1.24 (3H each, all s, H<sub>3</sub>-24, 25, 26, 27 and 23), 2.97 (1H, t like, *ca.*  $J$  = 8 Hz, H-  
156 3), 3.89 (2H, s, H<sub>2</sub>-29), 4.77, 4.86 (1H each, both br. s, H<sub>2</sub>-30);  $^{13}\text{C}$  NMR (DMSO- $d_6$ ,  
157 125 MHz) spectroscopic data: see Tab. S1; ESI-Q-Orbitrap MS  $m/z$  471.34747 [M-  
158 H]<sup>-</sup> (calcd for C<sub>30</sub>H<sub>47</sub>O<sub>4</sub>, 471.34689).

159 *2-O-trans-p-Coumaroylaliphitolic acid (6, purity percentage is 97.9%)*: White  
160 powder;  $^1\text{H}$  NMR (C<sub>5</sub>D<sub>5</sub>N, 500 MHz) spectroscopic data:  $\delta$  1.01, 1.04, 1.09, 1.11,  
161 1.30, 1.88 (3H each, all s, H<sub>3</sub>-25, 26, 27, 24, 23 and 29), 3.66 (1H, d,  $J$  = 10.0 Hz, H-  
162 3), 4.81, 4.96 (1H each, both br. s, H<sub>2</sub>-29), 5.65 (1H, dt,  $J$  = 4.5, 10.0 Hz, H-2), 6.63,  
163 8.03 (1H each, both d,  $J$  = 16.5 Hz, H-8',7'), 7.17 (2H, d,  $J$  = 8.5 Hz, H-3',5'), 7.51  
164 (2H, d,  $J$  = 8.5 Hz, H-2',6');  $^{13}\text{C}$  NMR (C<sub>5</sub>D<sub>5</sub>N, 125 MHz) spectroscopic data: see Tab.  
165 S1; ESI-Q-Orbitrap MS  $m/z$  617.38452 [M-H]<sup>-</sup> (calcd for C<sub>39</sub>H<sub>53</sub>O<sub>6</sub>, 617.38367).

166 *3-O-cis-p-Coumaroylaliphitolic acid (7, purity percentage is 97.3%)*: White  
167 powder;  $^1\text{H}$  NMR (C<sub>5</sub>D<sub>5</sub>N, 600 MHz) spectroscopic data:  $\delta$  [1.32 (1H, t,  $J$  = 10.8 Hz),  
168 2.37 (1H, dd,  $J$  = 4.2, 10.8 Hz), H<sub>2</sub>-1], 4.26 (1H, dt,  $J$  = 4.2, 10.8 Hz, H-2), 5.20 (1H,  
169 d,  $J$  = 10.8 Hz, H-3), 1.03 (1H, m, overlapped, H-5), [1.35, 1.45 (1H, both m,  
170 overlapped), H<sub>2</sub>-6], [1.32 (1H, m), 1.35 (1H, m, overlapped), H<sub>2</sub>-7], 1.45 (1H, m,  
171 overlapped, H-9), 1.21, 1.50 (1H each, both m, H<sub>2</sub>-11), 1.20, 1.92 (1H each, both m,  
172 H<sub>2</sub>-12), 2.72 (1H, dt,  $J$  = 3.0, 11.4 Hz, H-13), 1.22, 1.85 (1H each, both m, H<sub>2</sub>-15),  
173 [1.55 (1H, m), 2.63 (1H, dt,  $J$  = 3.0, 12.6 Hz), H<sub>2</sub>-16], 1.74 (1H, t like, *ca.*  $J$  = 11 Hz,  
174 H-18), 3.53 (1H, dt,  $J$  = 4.2, 10.8 Hz, H-19), 1.53, 2.23 (2H, m, H<sub>2</sub>-21), 1.60, 2.25  
175 (1H each, both m, H<sub>2</sub>-22), 1.03, 0.96, 0.89, 1.03, 1.04, 1.78 (3H each, all s, H<sub>3</sub>-23, 24,

176 25, 26, 27 and 29), 4.71, 4.94 (1H each, both br. s, H<sub>2</sub>-30), 8.15 (2H, d, *J* = 8.5 Hz, H-  
177 2',6'), 7.14 (2H, d, *J* = 8.5 Hz, H-3',5'), 6.93, 6.09 (1H each, both d, *J* = 12.6 Hz, H-  
178 7', 8'); <sup>13</sup>C NMR (C<sub>5</sub>D<sub>5</sub>N, 150 MHz) spectroscopic data: see Tab. S1; ESI-Q-Orbitrap  
179 MS *m/z* 617.38422 [M-H]<sup>-</sup> (calcd for C<sub>39</sub>H<sub>53</sub>O<sub>6</sub>, 617.38367).

180 (3 $\alpha$ ,4 $\beta$ ,5 $\beta$ ,8 $\alpha$ ,9 $\beta$ ,10 $\alpha$ ,13 $\alpha$ ,14 $\beta$ ,15 $\beta$ )-13-Carboxy-4,9-dimethyl-15-(1-  
181 methylethenyl)-3-(1-methylethyl)-18-norandrostane-4-propanoic acid (**8**, purity  
182 percentage is 96.5%): White powder; <sup>1</sup>H NMR (C<sub>5</sub>D<sub>5</sub>N, 600 MHz) spectroscopic data:  
183  $\delta$  1.97 (2H, m, overlapped, H<sub>2</sub>-1), 2.51 (2H, t, *J* = 7.8 Hz, H<sub>2</sub>-2), 1.94 (1H, m, H-4),  
184 1.18 (1H, m, overlapped, H-5), 1.33 (2H, m, H<sub>2</sub>-6), 1.36, 1.42 (1H each, both m, H<sub>2</sub>-  
185 7), 1.72 (1H, br. d, *ca.* *J* = 12 Hz, H-9), 1.18, 1.54 (1H each, both m, overlapped, H<sub>2</sub>-  
186 11), 1.24, 1.94 (1H each, both m, H<sub>2</sub>-13), 2.79 (1H, t like, *ca.* *J* = 11 Hz, H-14), 1.27,  
187 1.84 (1H each, both m, H<sub>2</sub>-15), 1.55, 2.63 (1H each, both m, H<sub>2</sub>-16), 1.79 (1H, m,  
188 overlapped, H-18), 3.55 (1H, t like, *ca.* *J* = 11 Hz, H-19), 1.53, 2.25 (2H, m, H<sub>2</sub>-21),  
189 1.57, 2.28 (1H each, both m, H<sub>2</sub>-22), 0.94, 0.76, 0.79, 1.07, 1.12, 1.79 (3H each, all s,  
190 H<sub>3</sub>-23, 24, 25, 26, 27 and 29), 4.78, 4.96 (1H each, both s, H<sub>2</sub>-30); <sup>13</sup>C NMR (C<sub>5</sub>D<sub>5</sub>N,  
191 150 MHz) spectroscopic data: see Tab. S1; ESI-Q-Orbitrap MS *m/z* 471.34756 [M-  
192 H]<sup>-</sup> (calcd for C<sub>30</sub>H<sub>47</sub>O<sub>4</sub>, 471.34689).

193 *Ceanothic acid* (**9**, purity percentage is 99.0%): White powder; <sup>1</sup>H NMR (C<sub>5</sub>D<sub>5</sub>N,  
194 500 MHz) spectroscopic data:  $\delta$  1.08, 1.16, 1.27, 1.40, 1.43, 1.67 (3H each, all s, H<sub>3</sub>-  
195 27, 26, 24, 25, 23 and 29), 4.67, 4.86 (1H each, both s, H<sub>2</sub>-30); <sup>13</sup>C NMR (C<sub>5</sub>D<sub>5</sub>N, 125  
196 MHz) spectroscopic data: see Tab. S1; ESI-Q-Orbitrap MS *m/z* 485.32706 [M-H]<sup>-</sup>  
197 (calcd for C<sub>30</sub>H<sub>45</sub>O<sub>5</sub>, 485.32615). And according to our identification, the chemical



198 shift values of C-4 and C-8 in the literature were exchanged.

199 *Ceanothic acid 2-methyl ester (10, purity percentage is 98.2%)*: White powder;  
200 <sup>1</sup>H NMR (C<sub>5</sub>D<sub>5</sub>N, 600 MHz) spectroscopic data: δ 1.11, 1.14, 1.22, 1.31, 1.33, 1.78  
201 (3H each, all s, H<sub>3</sub>-26, 27, 24, 25, 23 and 29), 3.01 (1H, br. s, H-1), 4.60 (1H, br. s, H-  
202 3), 4.74, 4.95 (1H each, both s, H<sub>2</sub>-30); <sup>13</sup>C NMR (C<sub>5</sub>D<sub>5</sub>N, 150 MHz) spectroscopic  
203 data: see Tab. S1; ESI-Q-Orbitrap MS *m/z* 499.34256 [M-H]<sup>-</sup> (calcd for C<sub>31</sub>H<sub>47</sub>O<sub>5</sub>,  
204 499.3418).

205 *3-Oxo-oleana-12-en-28-oic acid (11, purity percentage is 96.3%)*: White powder;  
206 <sup>1</sup>H NMR (C<sub>5</sub>D<sub>5</sub>N, 500 MHz) spectroscopic data: δ 0.90, 0.97, 1.01, 1.02, 1.02, 1.16,  
207 1.26 (3H each, all s, H<sub>3</sub>-25, 29, 26, 24, 30, 23 and 27), 5.50 (1H, br. s, H-12); <sup>13</sup>C  
208 NMR (C<sub>5</sub>D<sub>5</sub>N, 125 MHz) spectroscopic data: see Tab. S1; ESI-Q-Orbitrap MS *m/z*  
209 453.33710 [M-H]<sup>-</sup> (calcd for C<sub>30</sub>H<sub>45</sub>O<sub>3</sub>, 453.33632). And according to our  
210 identification, the chemical shift values of C-9 and C-17 in the literature were  
211 exchanged.

212 *Oleanolic acid (12, purity percentage is 94.9%)*: White powder; <sup>1</sup>H NMR  
213 (C<sub>5</sub>D<sub>5</sub>N, 600 MHz) spectroscopic data: δ 0.91, 0.97, 1.03, 1.04, 1.04, 1.26, 1.30 (3H  
214 each, all s, H<sub>3</sub>-25, 29, 30, 24, 26, 23 and 27), 3.46 (1H, dd, *J* = 4.8, 10.2 Hz, H-3),  
215 5.52 (1H, t, *J* = 3.6 Hz, H-12); <sup>13</sup>C NMR (C<sub>5</sub>D<sub>5</sub>N, 150 MHz) spectroscopic data: see  
216 Tab. S2; ESI-Q-Orbitrap MS *m/z* 455.35303 [M-H]<sup>-</sup> (calcd for C<sub>30</sub>H<sub>47</sub>O<sub>3</sub>, 455.35197).

217 *Maslinic acid (13, purity percentage is 97.3%)*: White powder; <sup>1</sup>H NMR (C<sub>5</sub>D<sub>5</sub>N,  
218 500 MHz) spectroscopic data: δ 0.95, 0.99, 1.01, 1.01, 1.07, 1.27, 1.27 (3H each, all s,  
219 H<sub>3</sub>-29, 25, 26, 30, 24, 23 and 27), 3.38 (1H, d, *J* = 9.5 Hz, H-3), 4.07 (1H, ddd, *J* = 4.5,

220 10.0, 14.0 Hz, H-2), 5.46 (1H, t,  $J = 4.0$  Hz, H-12);  $^{13}\text{C}$  NMR ( $\text{C}_5\text{D}_5\text{N}$ , 125 MHz)  
221 spectroscopic data: see Tab. S2; ESI-Q-Orbitrap MS  $m/z$  471.34799  $[\text{M}-\text{H}]^-$  (calcd  
222 for  $\text{C}_{30}\text{H}_{47}\text{O}_4$ , 471.34689). And according to our identification, the chemical shift  
223 values of C-1 and C-17 in the literature were exchanged.

224 *11-Oxo-maslinic acid (2 $\alpha$ ,3 $\beta$ -dihydroxy-11-oxo-18 $\beta$ -olean-12-en-28-oic acid (14,*  
225 *purity percentage is 98.0%):* White powder;  $^1\text{H}$  NMR ( $\text{CD}_3\text{OD}$ , 600 MHz)  
226 spectroscopic data:  $\delta$  0.81, 0.94, 0.96, 0.98, 1.02, 1.17, 1.41 (3H each, all s, H<sub>3</sub>-24, 29,  
227 30, 26, 23, 25 and 27), 2.92 (1H, d,  $J = 9.6$  Hz, H-3), 3.67 (1H, ddd,  $J = 4.2, 9.6, 14.4$   
228 Hz, H-2), 5.56 (1H, s, H-12);  $^{13}\text{C}$  NMR ( $\text{CD}_3\text{OD}$ , 150 MHz) spectroscopic data: see  
229 Tab. S2; ESI-Q-Orbitrap MS  $m/z$  485.32717  $[\text{M}-\text{H}]^-$  (calcd for  $\text{C}_{30}\text{H}_{45}\text{O}_5$ , 485.32615).  
230 And according to our identification, the chemical shift values of C-7 and C-22 in the  
231 literature were exchanged.

232 *2 $\alpha$ -trans-p-Coumaroyloxy-2 $\alpha$ ,3 $\beta$ ,23 $\alpha$ -trihydroxy-olean-12-en-28-oic acid (15,*  
233 *purity percentage is 91.5%):* White powder;  $^1\text{H}$  NMR ( $\text{DMSO}-d_6$ , 600 MHz)  
234 spectroscopic data:  $\delta$  0.72, 0.77, 0.87, 0.87, 0.96, 0.99, 1.10 (3H each, all s, H<sub>3</sub>-26, 24,  
235 29, 30, 23, 25 and 27), 3.13 (1H, d,  $J = 10.8$  Hz, H-3), 4.90 (1H, dt, *ca.*  $J = 4.8, 10.8$   
236 Hz, H-2), 5.17 (1H, br. s, H-12), 6.32, 7.54 (1H each, both d,  $J = 15.6$  Hz, H-8',7'),  
237 6.80 (2H, d,  $J = 8.4$  Hz, H-3',5'), 7.52 (2H, d,  $J = 8.4$  Hz, H-2',6');  $^{13}\text{C}$  NMR ( $\text{DMSO}-$   
238  $d_6$ , 150 MHz) spectroscopic data: see Tab. S2; ESI-Q-Orbitrap MS  $m/z$  617.38428  
239  $[\text{M}-\text{H}]^-$  (calcd for  $\text{C}_{39}\text{H}_{53}\text{O}_6$ , 617.38367).

240 *2 $\alpha$ -cis-p-Coumaroyloxy-2 $\alpha$ ,3 $\beta$ ,23 $\alpha$ -trihydroxy-olean-12-en-28-oic acid (16,*  
241 *purity percentage is 98.0%):* White powder;  $^1\text{H}$  NMR ( $\text{DMSO}-d_6$ , 600 MHz)

242 spectroscopic data:  $\delta$  0.72, 0.77, 0.87, 0.87, 0.98, 0.99, 1.10 (3H each, all s, H<sub>3</sub>-26, 24,  
243 29, 30, 23, 25 and 27), 3.13 (1H, d,  $J$  = 10.8 Hz, H-3), 4.90 (1H, dt, *ca.*  $J$  = 4.8, 10.8  
244 Hz, H-2), 5.14 (1H, br. s, H-12), 5.75, 6.81 (1H each, both d,  $J$  = 13.2 Hz, H-8',7'),  
245 6.75 (2H, d,  $J$  = 8.4 Hz, H-3',5'), 7.69 (2H, d,  $J$  = 8.4 Hz, H-2',6'); <sup>13</sup>C NMR (DMSO-  
246 *d*<sub>6</sub>, 150 MHz) spectroscopic data: see Tab. S2; ESI-Q-Orbitrap MS  $m/z$  617.38440  
247 [M-H]<sup>-</sup> (calcd for C<sub>39</sub>H<sub>53</sub>O<sub>6</sub>, 617.38367).

248 *3-O-trans-p-Coumaroyl maslinic acid (17, purity percentage is 98.0%)*: White  
249 powder; <sup>1</sup>H NMR (C<sub>5</sub>D<sub>5</sub>N, 600 MHz) spectroscopic data:  $\delta$  0.97, 1.01, 1.01, 1.02,  
250 1.04, 1.06, 1.28 (3H each, all s, H<sub>3</sub>-29, 25, 26, 30, 24, 23 and 27), 4.29 (1H, ddd,  $J$  =  
251 4.8, 10.2, 10.8 Hz, H-2), 5.24 (1H, d,  $J$  = 10.2 Hz, H-3), 5.47 (1H, br. s, H-12), 6.68,  
252 8.00 (1H each, both d,  $J$  = 15.6 Hz, H-8',7'), 7.16 (2H, d,  $J$  = 8.4 Hz, H-3',5'), 7.56  
253 (2H, d,  $J$  = 8.4 Hz, H-2',6'); <sup>13</sup>C NMR (C<sub>5</sub>D<sub>5</sub>N, 150 MHz) spectroscopic data: see Tab.  
254 S2; ESI-Q-Orbitrap MS  $m/z$  617.38403 [M-H]<sup>-</sup> (calcd for C<sub>39</sub>H<sub>53</sub>O<sub>6</sub>, 617.38367).

255 *3,4-Seco-olean-12-ene-3,28-dioic acid (18, purity percentage is 98.3%)*: White  
256 powder; <sup>1</sup>H NMR (C<sub>5</sub>D<sub>5</sub>N, 600 MHz) spectroscopic data:  $\delta$  0.77, 0.85, 0.95, 0.99,  
257 1.02, 1.03, 1.26 (3H each, all s, H<sub>3</sub>-24, 25, 23, 29, 30, 26 and 27), 5.49 (1H, br. s, H-  
258 12); <sup>13</sup>C NMR (C<sub>5</sub>D<sub>5</sub>N, 150 MHz) spectroscopic data: see Tab. S2; ESI-Q-Orbitrap  
259 MS  $m/z$  471.34741 [M-H]<sup>-</sup> (calcd for C<sub>30</sub>H<sub>47</sub>O<sub>4</sub>, 471.34689).

260 *3-Oxo-urs-12-en-28-oic acid (19, purity percentage is 96.5%)*: White powder;  
261 <sup>1</sup>H NMR (C<sub>5</sub>D<sub>5</sub>N, 600 MHz) spectroscopic data:  $\delta$  0.89, 1.00, 1.02, 1.14, 1.20 (3H  
262 each, all s, H<sub>3</sub>-25, 24, 26, 23 and 27), 0.97 (3H, d,  $J$  = 6.0 Hz, H<sub>3</sub>-30), 1.00 (1H, d,  $J$  =  
263 6.0 Hz, H<sub>3</sub>-29), 5.47 (1H, br. s, H-12); <sup>13</sup>C NMR (C<sub>5</sub>D<sub>5</sub>N, 150 MHz) spectroscopic

264 data: see Tab. S2; ESI-Q-Orbitrap MS  $m/z$  453.33716  $[M-H]^-$  (calcd for  $C_{30}H_{45}O_3$ ,  
265 453.33632).

266 *Ursolic acid (20, purity percentage is 95.3%)*: White powder;  $^1H$  NMR ( $C_5D_5N$ ,  
267 600 MHz) spectroscopic data:  $\delta$  0.91, 1.04, 1.07, 1.24, 1.26 (3H each, all s,  $H_3$ -25, 24,  
268 26, 27 and 23), 0.97 (3H, d,  $J = 6.6$  Hz,  $H_3$ -30), 1.02 (1H, d,  $J = 6.6$  Hz,  $H_3$ -29), 3.47  
269 (1H, dd,  $J = 5.4, 10.2$  Hz, H-3), 5.51 (1H, t,  $J = 3.0$  Hz, H-12);  $^{13}C$  NMR ( $C_5D_5N$ , 150  
270 MHz) spectroscopic data: see Tab. S3; ESI-Q-Orbitrap MS  $m/z$  455.35297  $[M-H]^-$   
271 (calcd for  $C_{30}H_{47}O_3$ , 455.35197).

272 *2 $\alpha$ -Hydroxyursolic acid (21, purity percentage is 95.3%)*: White powder;  $^1H$   
273 NMR ( $C_5D_5N$ , 500 MHz) spectroscopic data:  $\delta$  0.97, 1.03, 1.06, 1.21, 1.26 (3H each,  
274 all s,  $H_3$ -25, 26, 24, 27 and 23), 0.96 (3H, d,  $J = 6.5$  Hz,  $H_3$ -30), 0.99 (1H, d,  $J = 6.5$   
275 Hz,  $H_3$ -29), 3.38 (1H, d,  $J = 9.5$  Hz, H-3), 4.07 (1H, ddd,  $J = 4.5, 9.5, 14.0$  Hz, H-2),  
276 5.47 (1H, t,  $J = 3.5$  Hz, H-12);  $^{13}C$  NMR ( $C_5D_5N$ , 125 MHz) spectroscopic data: see  
277 Tab. S3; ESI-Q-Orbitrap MS  $m/z$  471.34784  $[M-H]^-$  (calcd for  $C_{30}H_{47}O_4$ , 471.34689).

278 *Jacoumaric acid (22, purity percentage is 93.0%)*: White powder;  $^1H$  NMR  
279 ( $C_5D_5N$ , 500 MHz) spectroscopic data:  $\delta$  0.97 (3H, d,  $J = 6.0$  Hz,  $H_3$ -30), 1.00 (3H, d,  
280  $J = 5.0$  Hz,  $H_3$ -29), 1.01, 1.05, 1.05, 1.09, 1.24 (3H each, all s,  $H_3$ -25, 24, 26, 23 and  
281 27), 4.29 (1H, dt,  $J = 5.0, 9.5$  Hz, H-2), 5.27 (1H, d,  $J = 9.5$  Hz, H-3), 5.48 (1H, t,  $J =$   
282 4.0 Hz, H-12), 6.68, 8.00 (1H each, both d,  $J = 16.0$  Hz, H-8',7'), 7.17 (2H, d,  $J = 8.5$   
283 Hz, H-3',5'), 7.51 (2H, d,  $J = 8.5$  Hz, H-2',6');  $^{13}C$  NMR ( $C_5D_5N$ , 125 MHz)  
284 spectroscopic data: see Tab. S3; ESI-Q-Orbitrap MS  $m/z$  617.38409  $[M-H]^-$  (calcd  
285 for  $C_{39}H_{53}O_6$ , 617.38367). And according to our identification, the chemical shift

286 values of C-26 and C-29, C-3',5' and C-8' in the literature were exchanged.

287 *(1S,2S,4aR,4bS,6aS,9R,10S,10aS,12aR)-6a-Carboxy-*  
288 *1,2,3,4,4a,4b,5,6,6a,7,8,9,10,10a,12,12a-hexadecahydro-1,4a,4b,9,10-pentamethyl-2-*  
289 *(1-methylethyl)-1-chrysenepropanoic acid (23, purity percentage is 92.8%):* White  
290 powder; <sup>1</sup>H NMR (C<sub>5</sub>D<sub>5</sub>N, 600 MHz) spectroscopic data: δ 1.99 (2H, m, overlapped,  
291 H<sub>2</sub>-1), 2.53 (2H, t, *J* = 7.2 Hz, H<sub>2</sub>-2), 1.92 (1H, m, H-4), 1.22 (1H, m, overlapped, H-  
292 5), 1.35 (1H, m, H<sub>2</sub>-6), 1.38, 1.46 (1H each, both m, H<sub>2</sub>-7), 2.01 (1H, m, overlapped,  
293 H-9), 1.95, 2.09 (1H each, both m, H<sub>2</sub>-11), 5.48 (1H, t like, *ca.* *J* = 4 Hz, H-12), [1.23  
294 (1H, m, overlapped), 2.31 (1H, br. t, *ca.* *J* = 11 Hz), H<sub>2</sub>-15], 2.07, 2.12 (1H each, both  
295 m, H<sub>2</sub>-16), 2.64 (1H, d, *J* = 10.2 Hz, H-18), 1.45 (1H, m, H-19), 1.02 (1H, m, H-20),  
296 2.00 (2H, m, overlapped, H<sub>2</sub>-21), 1.37, 1.47 (1H each, both m, H<sub>2</sub>-22), 0.93, 0.77,  
297 0.85, 1.07, 1.24 (3H each, all s, H<sub>3</sub>-23, 24, 25, 26 and 27), 0.94, 0.95 (3H each, both d,  
298 *J* = 6.0 Hz, H<sub>3</sub>-29 and 30); <sup>13</sup>C NMR (C<sub>5</sub>D<sub>5</sub>N, 150 MHz) spectroscopic data: see Tab.  
299 S3; ESI-Q-Orbitrap MS *m/z* 471.34763 [M-H]<sup>-</sup> (calcd for C<sub>30</sub>H<sub>47</sub>O<sub>4</sub>, 471.34689).

300 *Pomonic acid (24, purity percentage is 93.3%):* White powder; <sup>1</sup>H NMR (C<sub>5</sub>D<sub>5</sub>N,  
301 600 MHz) spectroscopic data: δ 0.93, 1.02, 1.10, 1.15, 1.71 (3H each, all s, H<sub>3</sub>-25, 24,  
302 26, 23 and 27), 1.14 (3H, d, *J* = 6.6 Hz, H<sub>3</sub>-30), 5.61 (1H, br. s, H-12); <sup>13</sup>C NMR  
303 (C<sub>5</sub>D<sub>5</sub>N, 150 MHz) spectroscopic data: see Tab. S3; ESI-Q-Orbitrap MS *m/z*  
304 469.33218 [M-H]<sup>-</sup> (calcd for C<sub>30</sub>H<sub>45</sub>O<sub>4</sub>, 469.33124). And according to our  
305 identification, the chemical shift values of C-23 and C-29 in the literature were  
306 exchanged.

307 *Pomolic acid (25, purity percentage is 93.7%):* White powder; <sup>1</sup>H NMR (C<sub>5</sub>D<sub>5</sub>N,

308 600 MHz) spectroscopic data:  $\delta$  0.94, 1.05, 1.13, 1.26, 1.75 (3H each, all s, H<sub>3</sub>-25, 24,  
309 26, 23 and 27), 1.14 (3H, d,  $J = 6.0$  Hz, H<sub>3</sub>-30), 3.46 (1H, br. d, *ca.*  $J = 9$  Hz, H-3),  
310 5.63 (1H, br. s, H-12); <sup>13</sup>C NMR (C<sub>5</sub>D<sub>5</sub>N, 150 MHz) spectroscopic data: see Tab. S3;  
311 ESI-Q-Orbitrap MS  $m/z$  471.34744 [M-H]<sup>-</sup> (calcd for C<sub>30</sub>H<sub>47</sub>O<sub>4</sub>, 471.34689).

312 *2-Oxopomolic acid (26, purity percentage is 93.3%)*: White powder; <sup>1</sup>H NMR  
313 (C<sub>5</sub>D<sub>5</sub>N, 600 MHz) spectroscopic data:  $\delta$  0.88, 0.89, 1.06, 1.33, 1.76 (3H each, all s,  
314 H<sub>3</sub>-24, 26, 25, 23 and 27), 1.14 (3H, d,  $J = 6.6$  Hz, H<sub>3</sub>-30), 1.44 (3H, s, H<sub>3</sub>-29), 4.20  
315 (1H, s, H-3), 5.58 (1H, t,  $J = 3.6$  Hz, H-12); <sup>13</sup>C NMR (C<sub>5</sub>D<sub>5</sub>N, 150 MHz)  
316 spectroscopic data: see Tab. S3; ESI-Q-Orbitrap MS  $m/z$  485.32736 [M-H]<sup>-</sup> (calcd  
317 for C<sub>30</sub>H<sub>45</sub>O<sub>5</sub>, 485.32615). And the chemical shift value of C-11 in the literature was  
318 revised here.

319 *Euscaphic acid (27, purity percentage is 98.3%)*: White powder; <sup>1</sup>H NMR  
320 (C<sub>5</sub>D<sub>5</sub>N, 500 MHz) spectroscopic data:  $\delta$  0.92, 0.99, 1.12, 1.29, 1.66 (3H each, all s,  
321 H<sub>3</sub>-24, 25, 26, 23 and 27), 1.13 (3H, d,  $J = 6.5$  Hz, H<sub>3</sub>-30), 3.79 (1H, d,  $J = 2.5$  Hz, H-  
322 3), 4.33 (1H, dt,  $J = 2.5, 11.0$  Hz, H-2), 5.60 (1H, br. s, H-12); <sup>13</sup>C NMR (C<sub>5</sub>D<sub>5</sub>N, 125  
323 MHz) spectroscopic data: see Tab. S3; ESI-Q-Orbitrap MS  $m/z$  487.34286 [M-H]<sup>-</sup>  
324 (calcd for C<sub>30</sub>H<sub>47</sub>O<sub>5</sub>, 487.34180).

325 *2 $\beta$ ,19 $\alpha$ -Hydroxyursolic acid (28, purity percentage is 97.0%)*: White powder; <sup>1</sup>H  
326 NMR (C<sub>5</sub>D<sub>5</sub>N, 500 MHz) spectroscopic data:  $\delta$  1.15 (3H, d,  $J = 6.5$  Hz, H<sub>3</sub>-30), 1.19,  
327 1.29, 1.41, 1.56, 1.79 (3H each, all s, H<sub>3</sub>-26, 23, 24, 25 and 27), 1.49 (3H, s, H<sub>3</sub>-29),  
328 3.45 (1H, d,  $J = 3.0$  Hz, H-3), 4.44 (1H, q,  $J = 3.0$  Hz, H-2), 5.63 (1H, br. d, *ca.*  $J = 4$   
329 Hz, H-12); <sup>13</sup>C NMR (C<sub>5</sub>D<sub>5</sub>N, 125 MHz) spectroscopic data: see Tab. S3; ESI-Q-

330 Orbitrap MS  $m/z$  487.34277  $[M-H]^-$  (calcd for  $C_{30}H_{47}O_5$ , 487.34180). And the  
331 chemical shift value of C-2 in the literature was revised here.

332 *Cecropiacic acid (29, purity percentage is 99.0%)*: White powder;  $^1H$  NMR  
333 ( $C_5D_5N$ , 600 MHz) spectroscopic data:  $\delta$  1.09 (3H, d,  $J = 6.6$  Hz, H<sub>3</sub>-30), 1.19, 1.20,  
334 1.36, 1.56, 1.59, 1.88 (3H each, all s, H<sub>3</sub>-26, 25, 29, 23, 24 and 27), 5.66 (1H, t like,  
335 *ca.*  $J = 4$  Hz, H-12);  $^{13}C$  NMR ( $C_5D_5N$ , 150 MHz) spectroscopic data: see Tab. S3;  
336 ESI-Q-Orbitrap MS  $m/z$  517.31659  $[M-H]^-$  (calcd for  $C_{30}H_{45}O_7$ , 517.31598).  
337 According to our identification, the chemical shift values of H<sub>3</sub>-23 and H<sub>3</sub>-24 in the  
338 literature were exchanged.

340

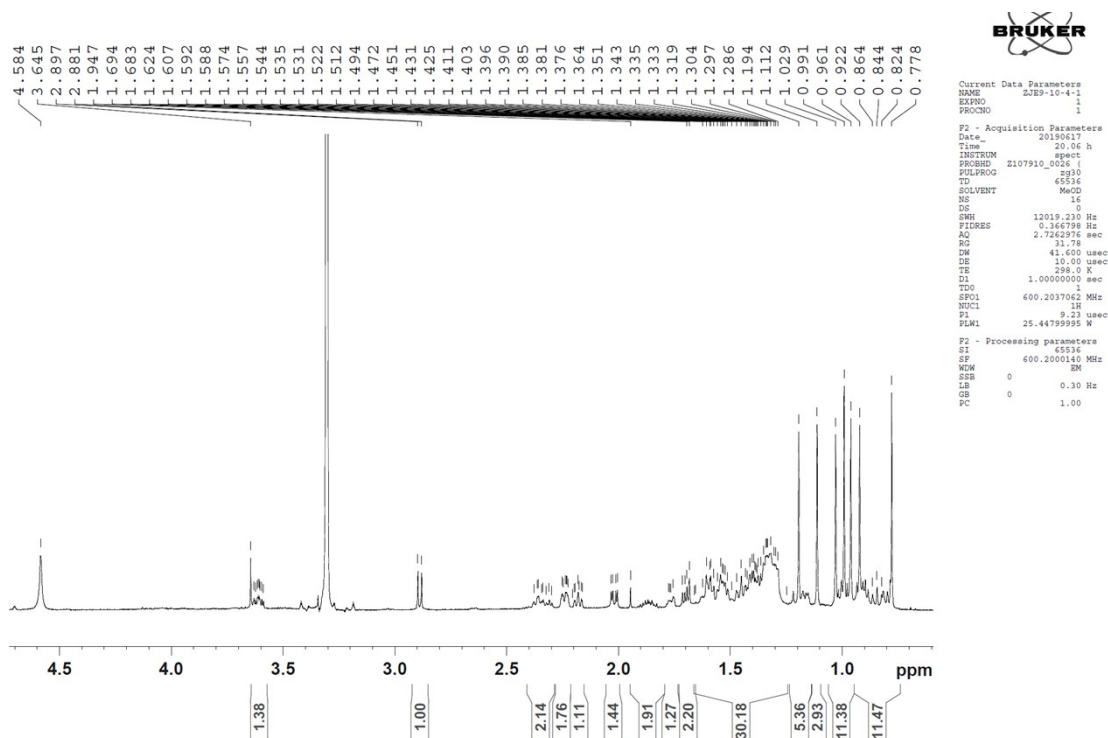Fig. S1. <sup>1</sup>H NMR (600MHz, CD<sub>3</sub>OD) spectrum of compound 1

341

342

343

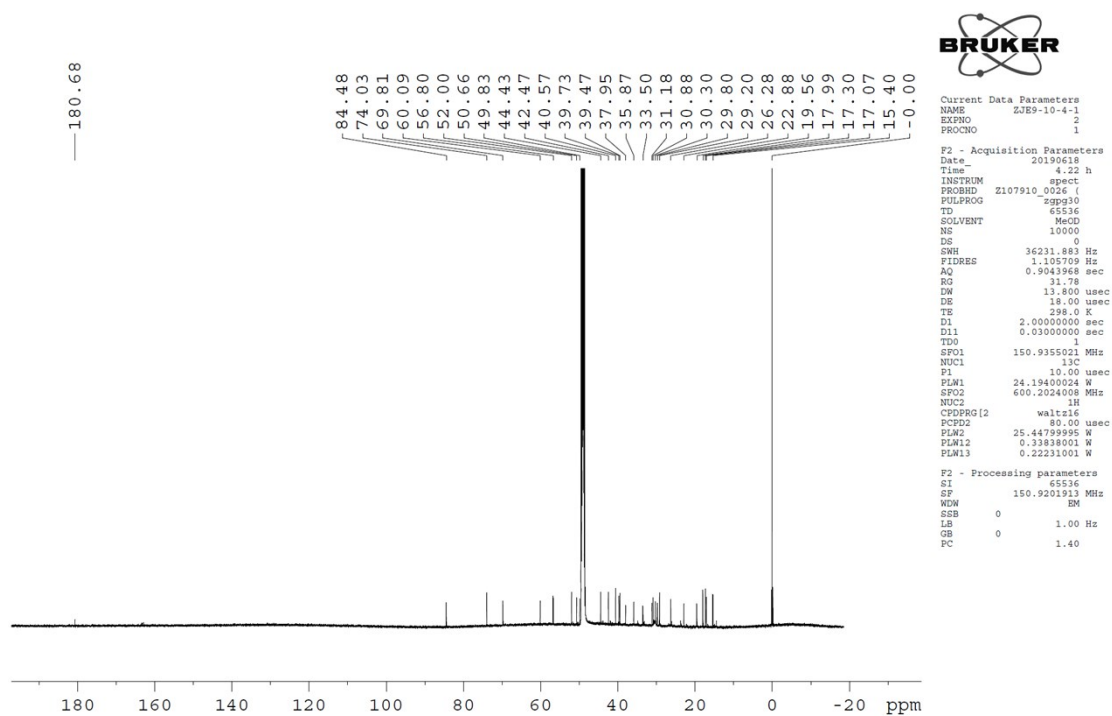Fig. S2. <sup>13</sup>C NMR (150MHz, CD<sub>3</sub>OD) spectrum of compound 1

344

345

346



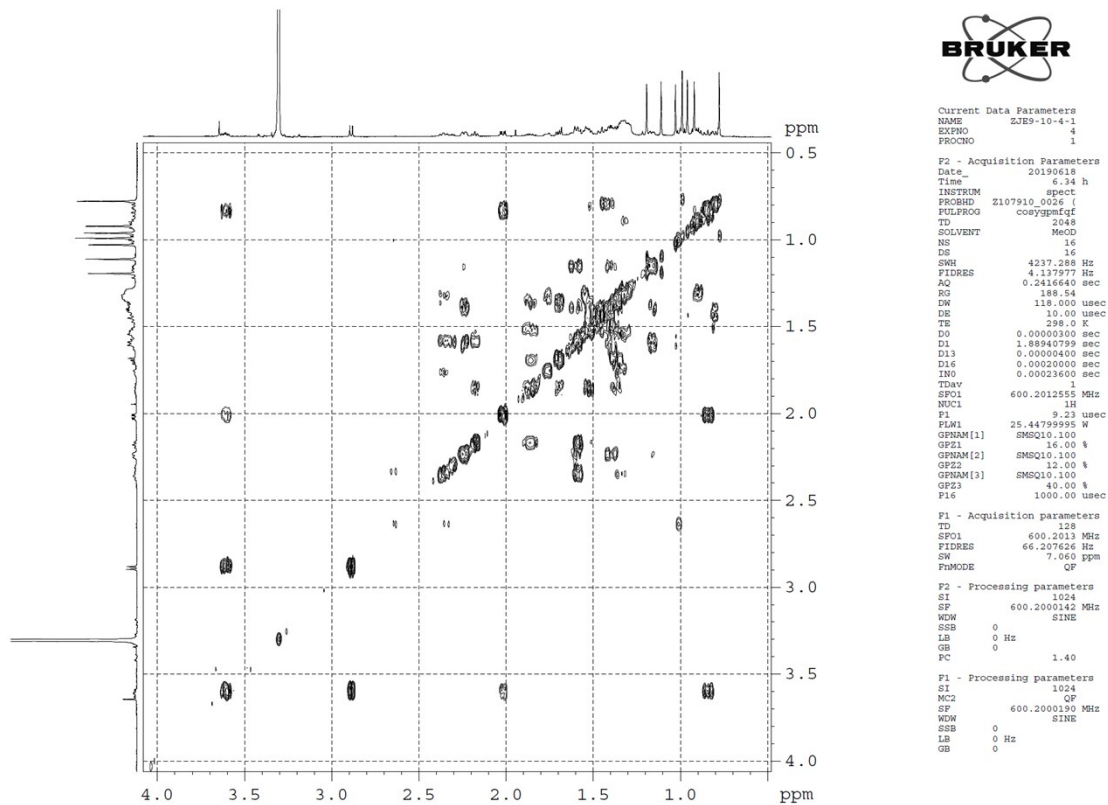

347

348

349

Fig. S3. The  $^1\text{H}$   $^1\text{H}$  COSY ( $\text{CD}_3\text{OD}$ ) spectrum of compound 1

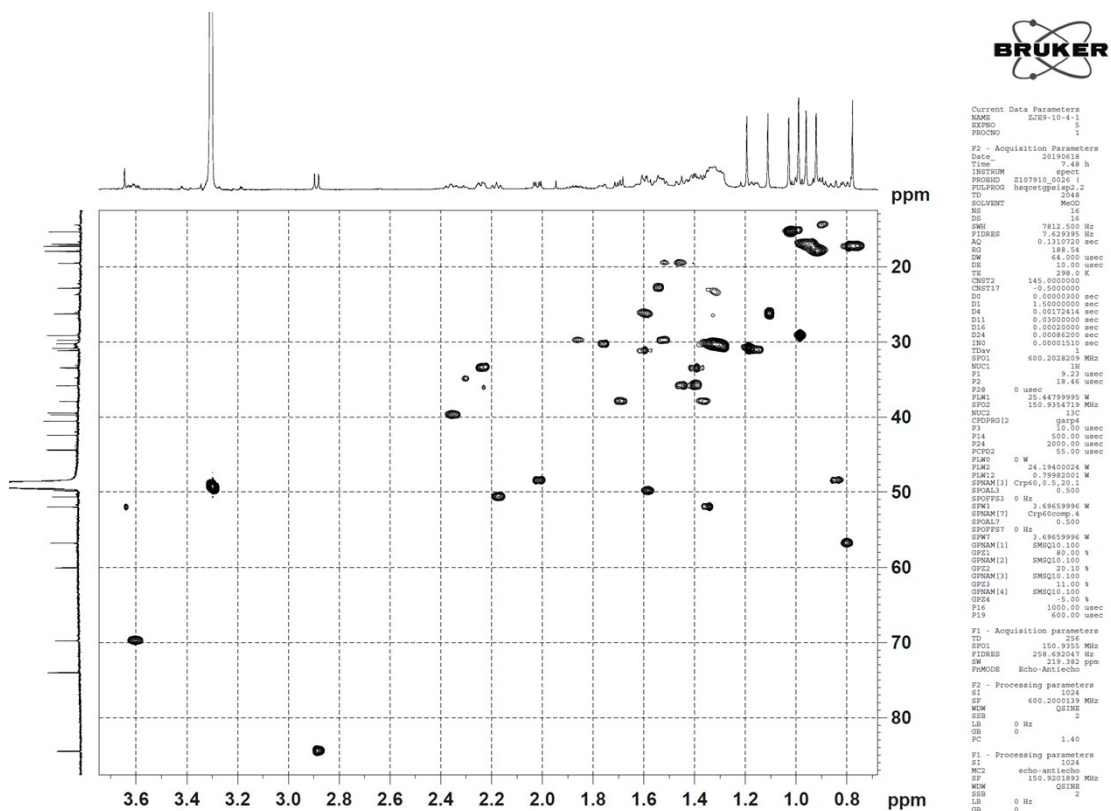

350

351

352

Fig. S4. The HSQC ( $\text{CD}_3\text{OD}$ ) spectrum of compound 1

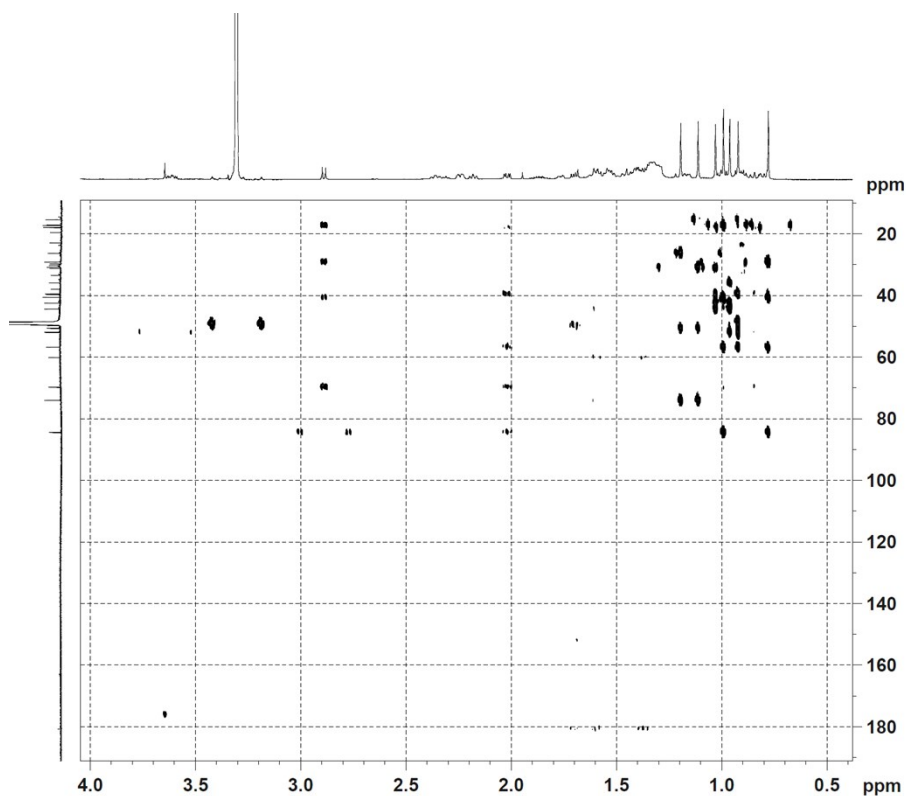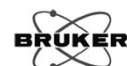

```

Current Data Parameters
NAME      ZJ89-10-4-1
EXPNO    12
PROCNO   1

F2 - Acquisition Parameters
Date_    20190625
Time     17:40 h
INSTRUM  spect
PROBHD   Z107910_0026 (
PULPROG  hmcgprndgdf
TD        4096
SOLVENT  MeOD
NS        100
DS        16
SWH       3906.250 Hz
FIDRES   1.897349 Hz
AQ        0.5242880 sec
RG        188.54
DW        128.000 usec
DE        10.00 usec
TE        298.0 K
CNS113   8.0000000
DO        0.0000000 sec
D1        1.23785603 sec
D2        0.04620000 sec
D16       0.00020000 sec
INO       0.00001510 sec
TD0AV    1
SF01     600.2014707 MHz
NUC1      1H
P1        9.23 usec
P2        18.46 usec
PLW1     25.44799995 W
SF02     150.9355021 MHz
NUC2      13C
P3        10.00 usec
PLW2     24.39400024 W
GPNAM[1] SMSQ10.100
GP21     50.00 %
GPNAM[2] SMSQ10.100
GP22     30.00 %
GPNAM[3] SMSQ10.100
GP23     40.10 %
P16      1000.00 usec

F1 - Acquisition parameters
TD        128
SF01     150.9355 MHz
FIDRES   517.384094 Hz
SW        213.382 ppm
FhMODE   QF

F2 - Processing parameters
SI        4096
SF        600.2000113 MHz
WDW       SINE
SSB       0
LB        0 Hz
GB        0
PC        1.40

F1 - Processing parameters
SI        1024
MC2       QF
SF        150.9202213 MHz
WDW       SINE
SSB       0
LB        0 Hz
GB        0
  
```

Fig. S5. The HMBC (CD<sub>3</sub>OD) spectrum of compound 1

353  
354  
355

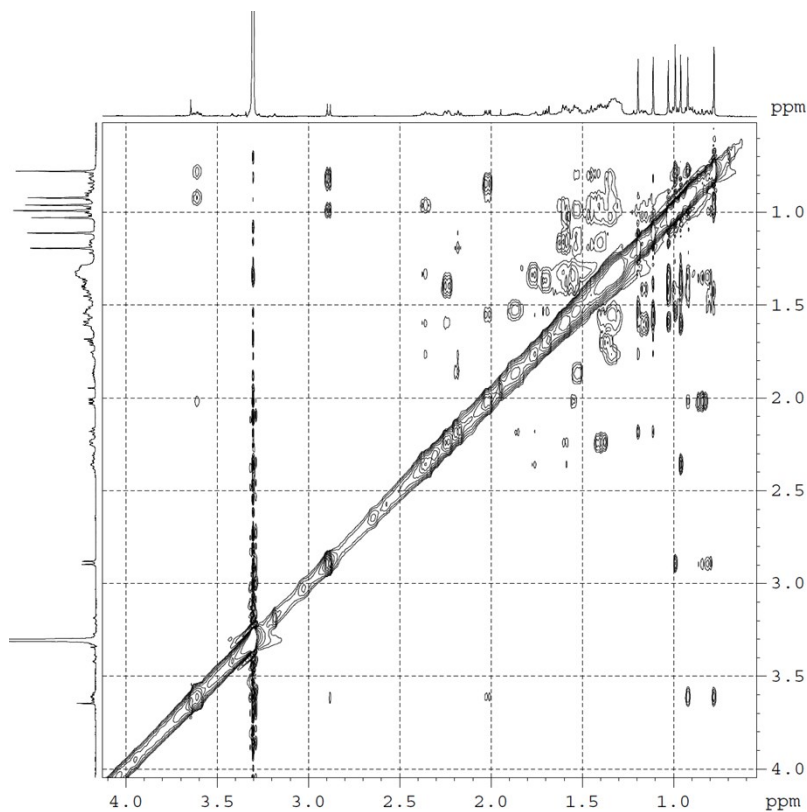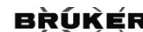

```

Current Data Parameters
NAME      ZJ89-10-4-1
EXPNO    14
PROCNO   1

F2 - Acquisition Parameters
Date_    20200105
Time     19:48 h
INSTRUM  spect
PROBHD   Z107910_0026 (
PULPROG  noesypphpp
TD        2048
SOLVENT  MeOD
NS        100
DS        32
SWH       4629.39 Hz
FIDRES   4.521122 Hz
AQ        0.2211840 sec
RG        60.35
DW        108.000 usec
DE        10.00 usec
TE        303.0 K
DO        0.0009625 sec
D1        1.94920897 sec
D2        0.60000002 sec
D11       0.03000000 sec
D12       0.00002000 sec
D16       0.00020000 sec
INO       0.00021600 sec
TD0AV    1
SF01     600.2017038 MHz
NUC1      1H
P1        9.23 usec
P2        18.46 usec
P17      2500.00 usec
PLW1     25.44799995 W
PLW10    3.46499991 W
GPNAM[1] SMSQ10.100
GP21     40.00 %
P16      1000.00 usec

F1 - Acquisition parameters
TD        247
SF01     600.2017 MHz
FIDRES   37.486081 Hz
SW        7.713 ppm
FhMODE   States-TPPI

F2 - Processing parameters
SI        1024
SF        600.2000130 MHz
WDW       QSINE
SSB       2
LB        0 Hz
GB        0
PC        1.00

F1 - Processing parameters
SI        1024
MC2       States-TPPI
SF        600.2000131 MHz
WDW       QSINE
SSB       2
LB        0 Hz
GB        0
  
```

Fig. S6. The NOESY (CD<sub>3</sub>OD) spectrum of compound 1

356  
357  
358

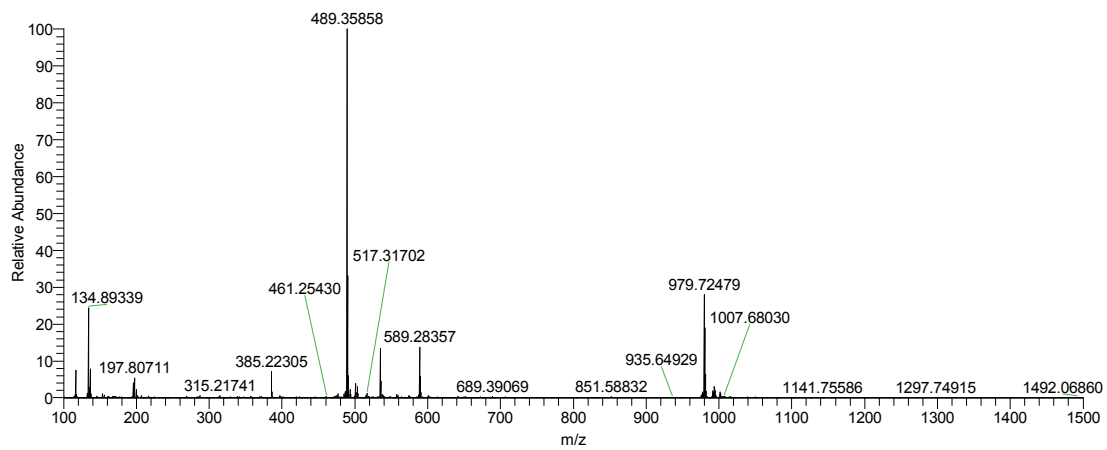

359

360

**Fig. S7.** The ESI-Q-Orbitrap MS spectrum of compound **1**

362

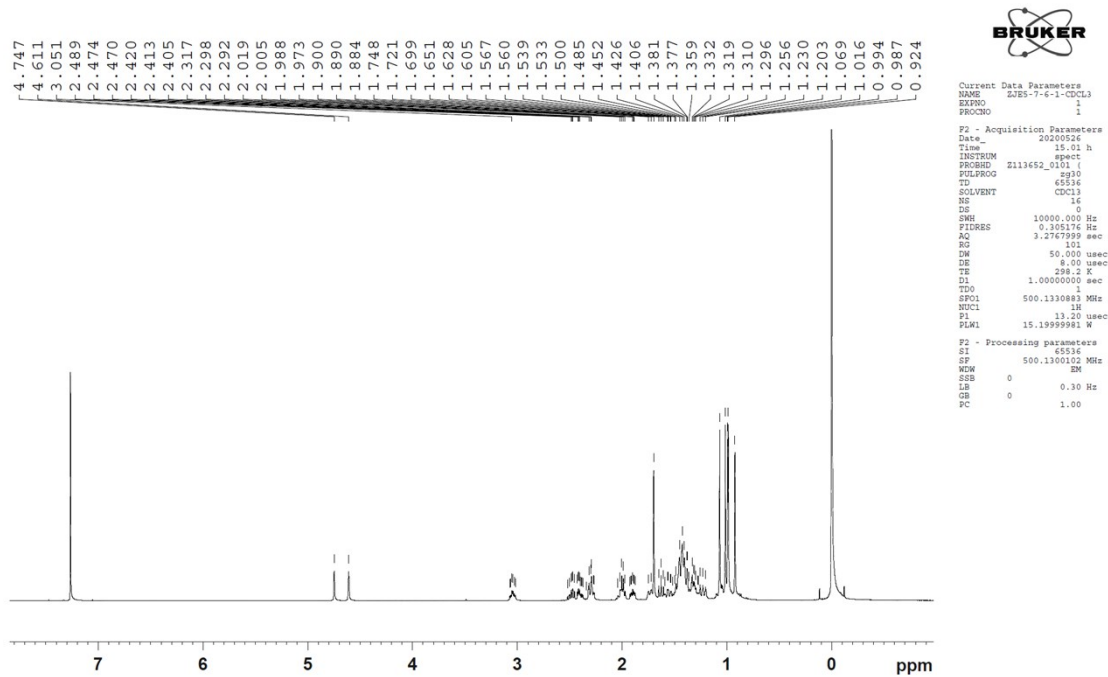

363

364

365

Fig. S8.  $^1\text{H}$  NMR (500MHz,  $\text{CDCl}_3$ ) spectrum of compound 2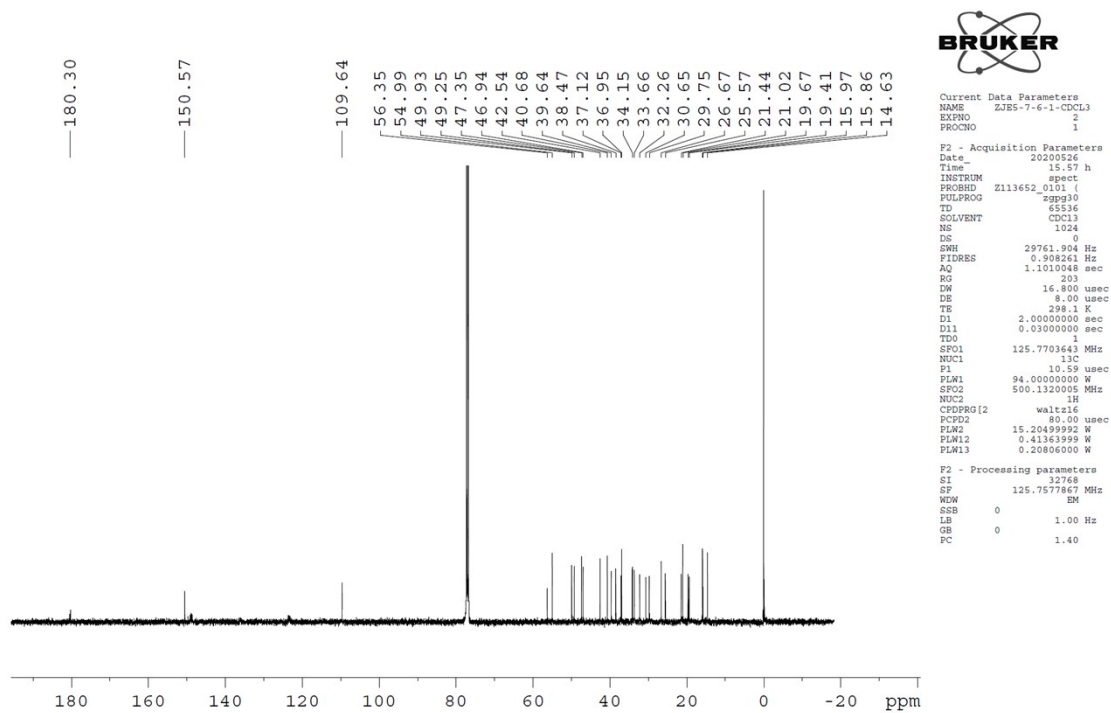

366

367

368

Fig. S9.  $^{13}\text{C}$  NMR (125MHz,  $\text{CDCl}_3$ ) spectrum of compound 2

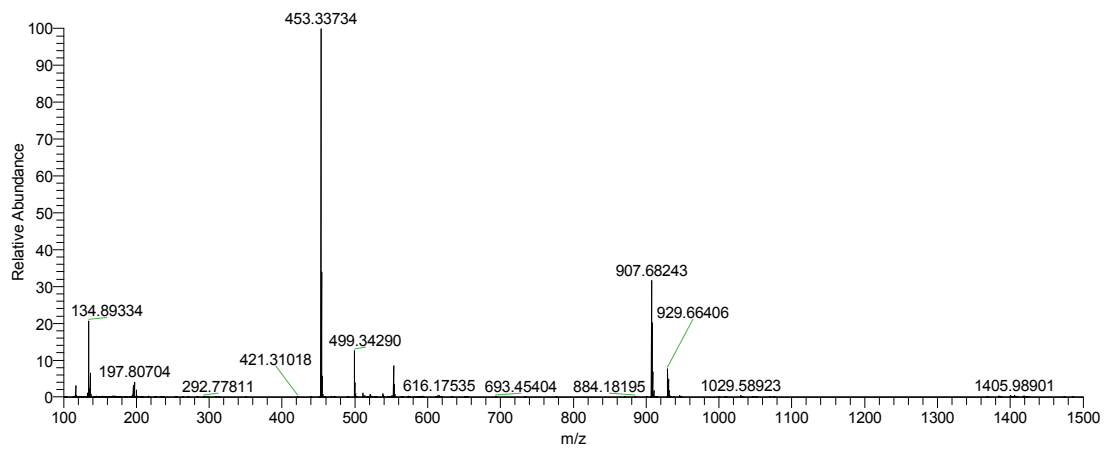

369

370

**Fig. S10.** The ESI-Q-Orbitrap MS spectrum of compound **2**

372

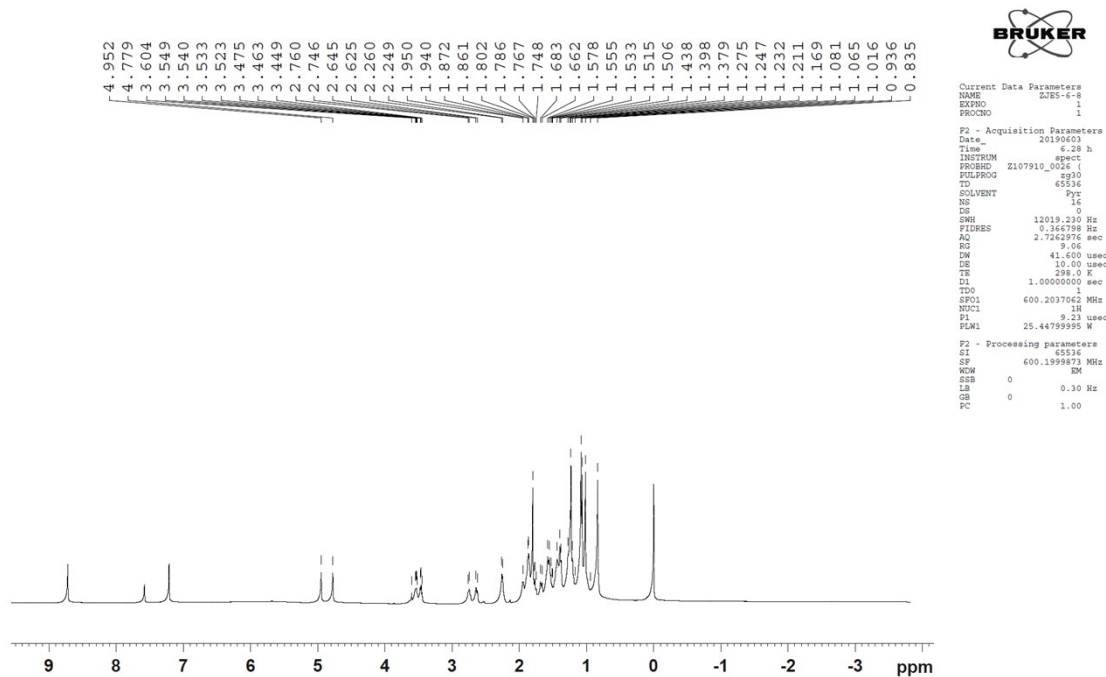

373

374

375

Fig. S11. <sup>1</sup>H NMR (600MHz, C<sub>5</sub>D<sub>5</sub>N) spectrum of compound 3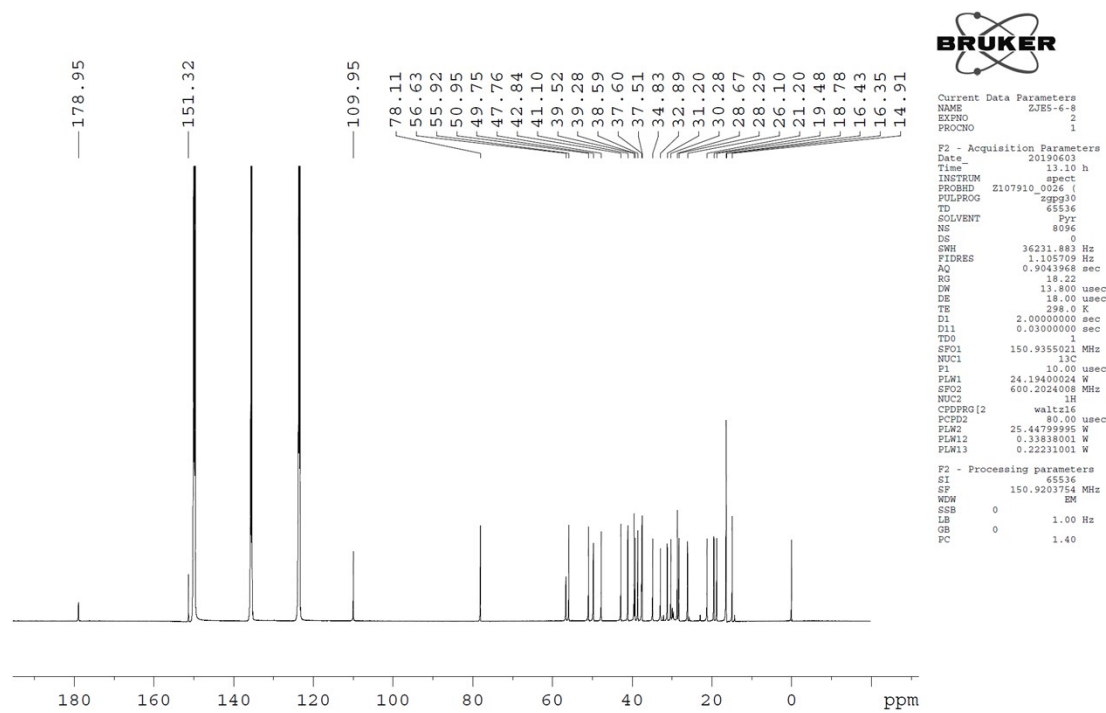

376

377

378

Fig. S12. <sup>13</sup>C NMR (150MHz, C<sub>5</sub>D<sub>5</sub>N) spectrum of compound 3

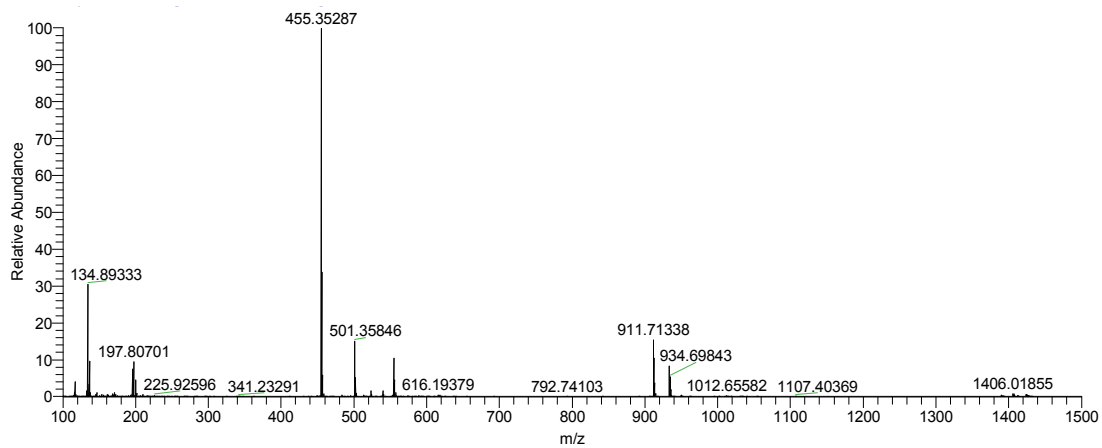

379  
380

**Fig. S13.** The ESI-Q-Orbitrap MS spectrum of compound **3**

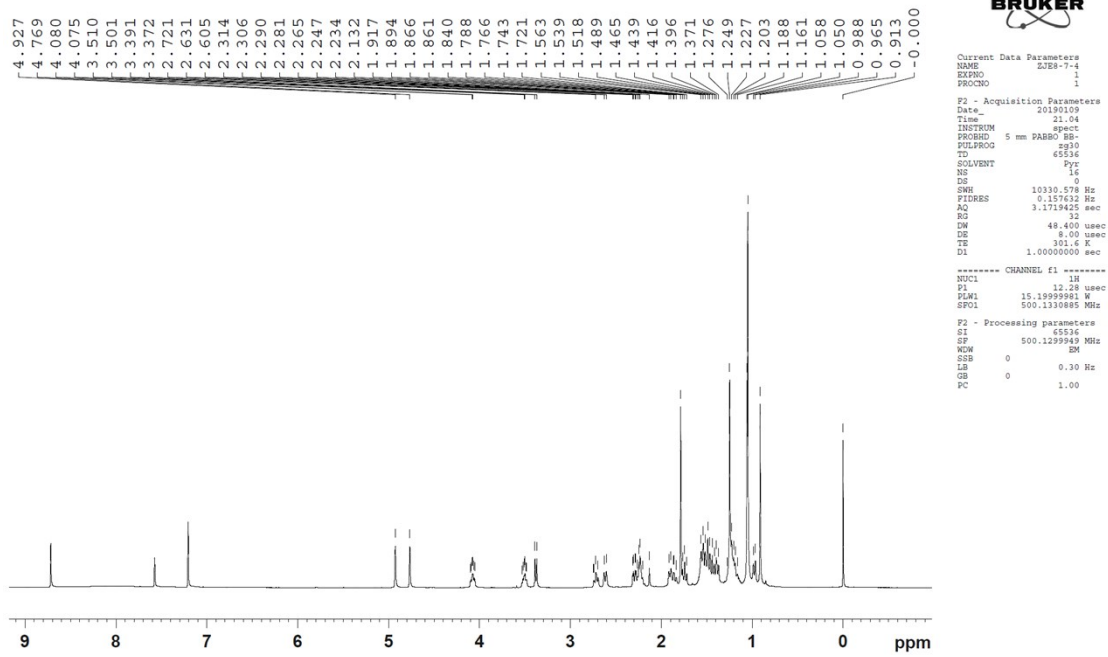

382  
383  
384  
Fig. S14.  $^1\text{H}$  NMR (500MHz,  $\text{C}_5\text{D}_5\text{N}$ ) spectrum of compound 4

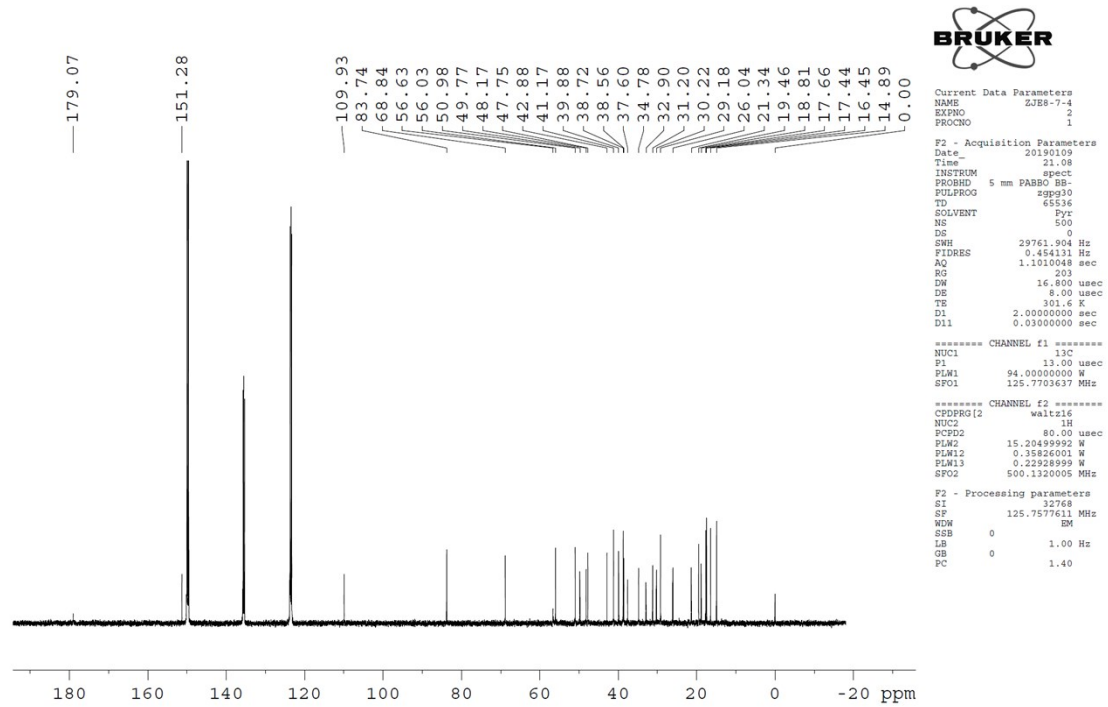

385  
386  
387  
Fig. S15.  $^{13}\text{C}$  NMR (125MHz,  $\text{C}_5\text{D}_5\text{N}$ ) spectrum of compound 4



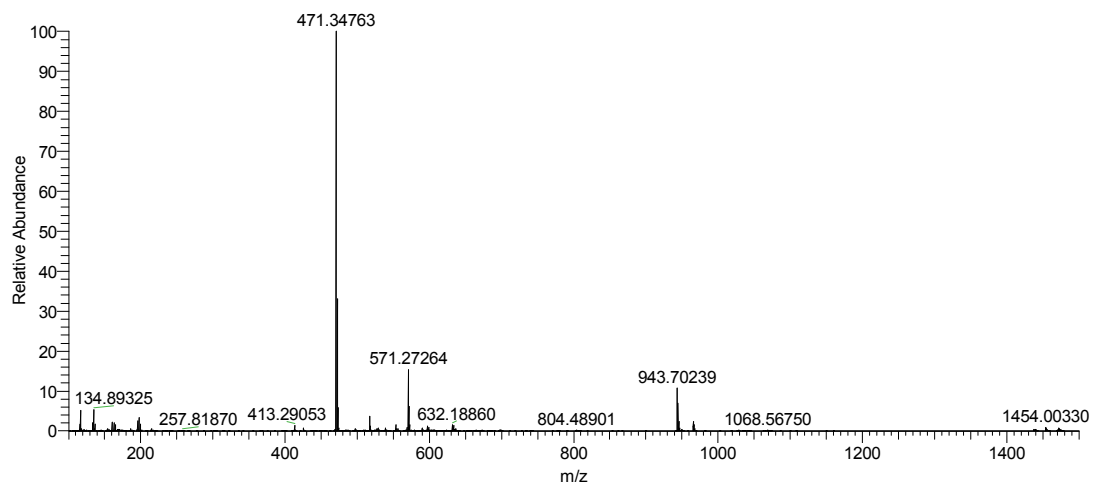

388  
389  
390

**Fig. S16.** The ESI-Q-Orbitrap MS spectrum of compound **4**

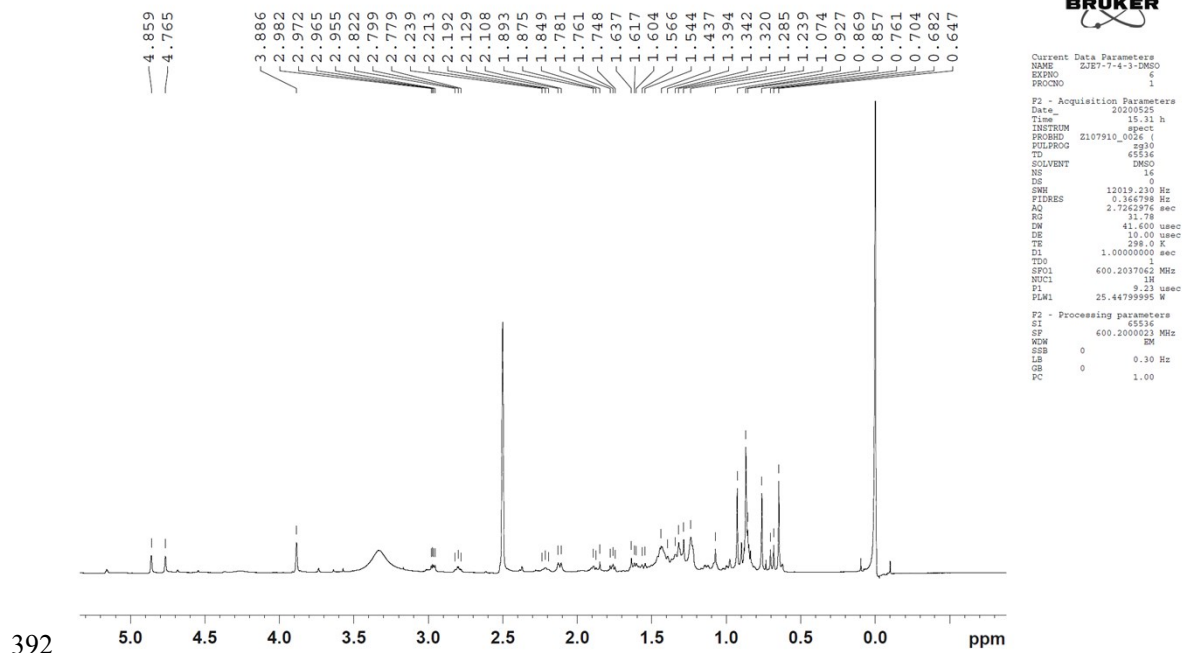

392  
393  
394

Fig. S17. <sup>1</sup>H NMR (500MHz, C<sub>5</sub>D<sub>5</sub>N) spectrum of compound 5

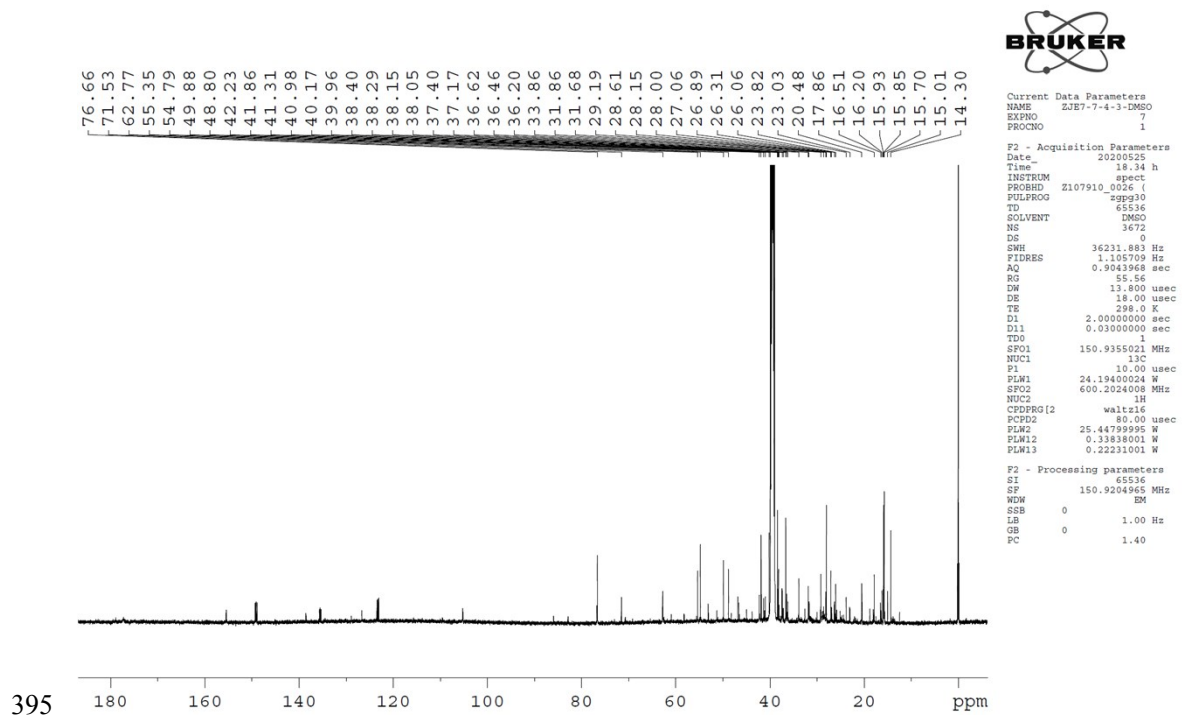

395  
396  
397  
398

Fig. S18. <sup>13</sup>C NMR (125MHz, C<sub>5</sub>D<sub>5</sub>N) spectrum of compound 5

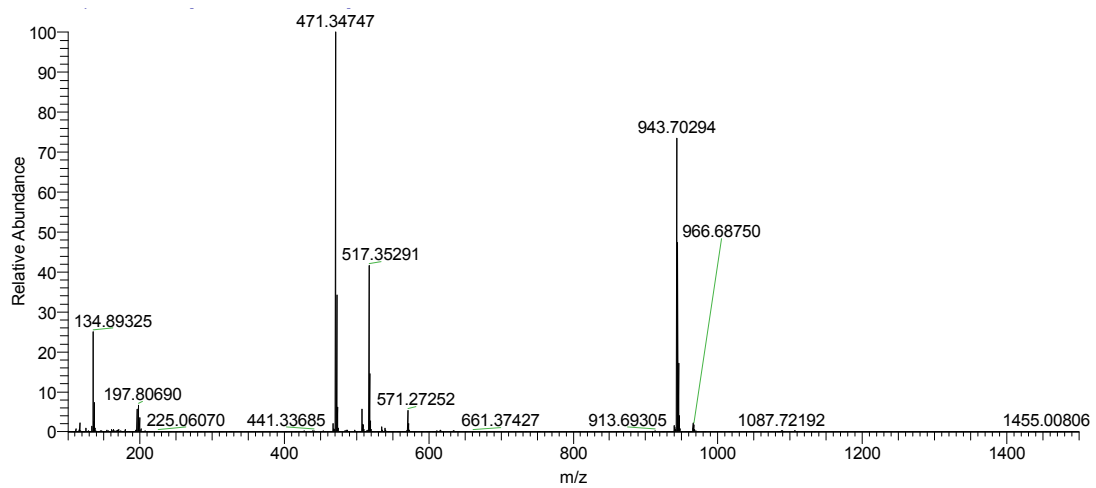

399  
400  
401

**Fig. S19.** The ESI-Q-Orbitrap MS spectrum of compound **5**

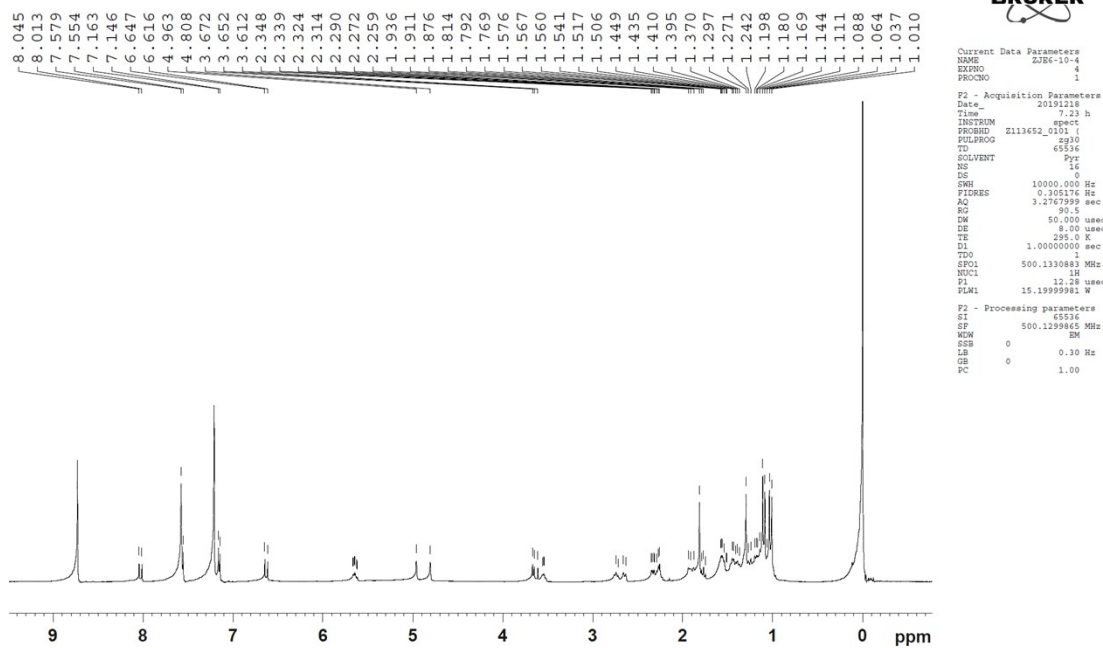

403  
404  
405

Fig. S20. <sup>1</sup>H NMR (500MHz, C<sub>5</sub>D<sub>5</sub>N) spectrum of compound 6

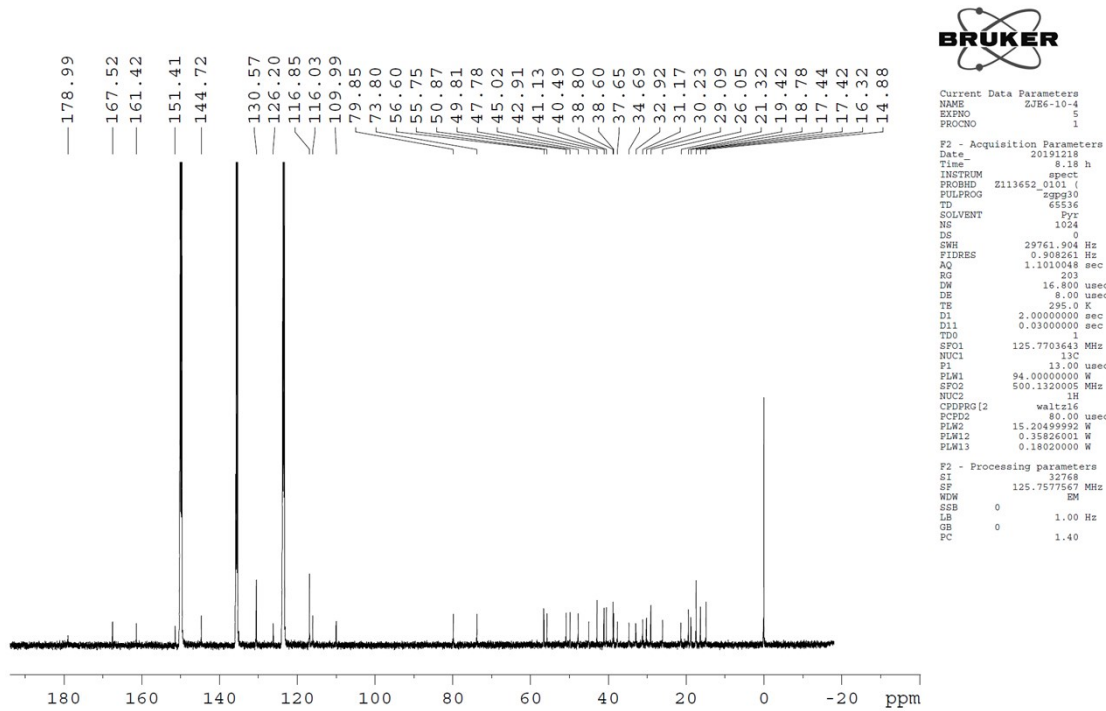

406  
407  
408

Fig. S21. <sup>13</sup>C NMR (125MHz, C<sub>5</sub>D<sub>5</sub>N) spectrum of compound 6

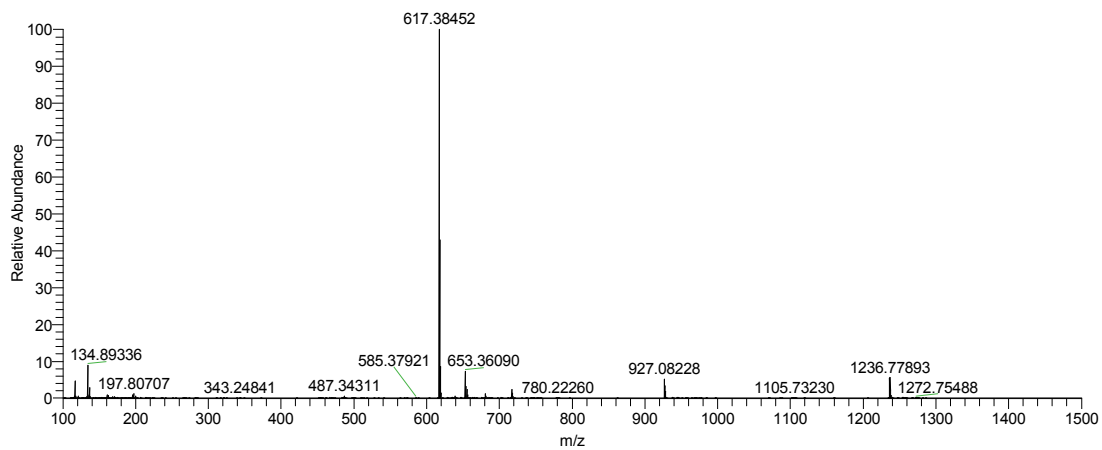

409

410

**Fig. S22.** The ESI-Q-Orbitrap MS spectrum of compound **6**

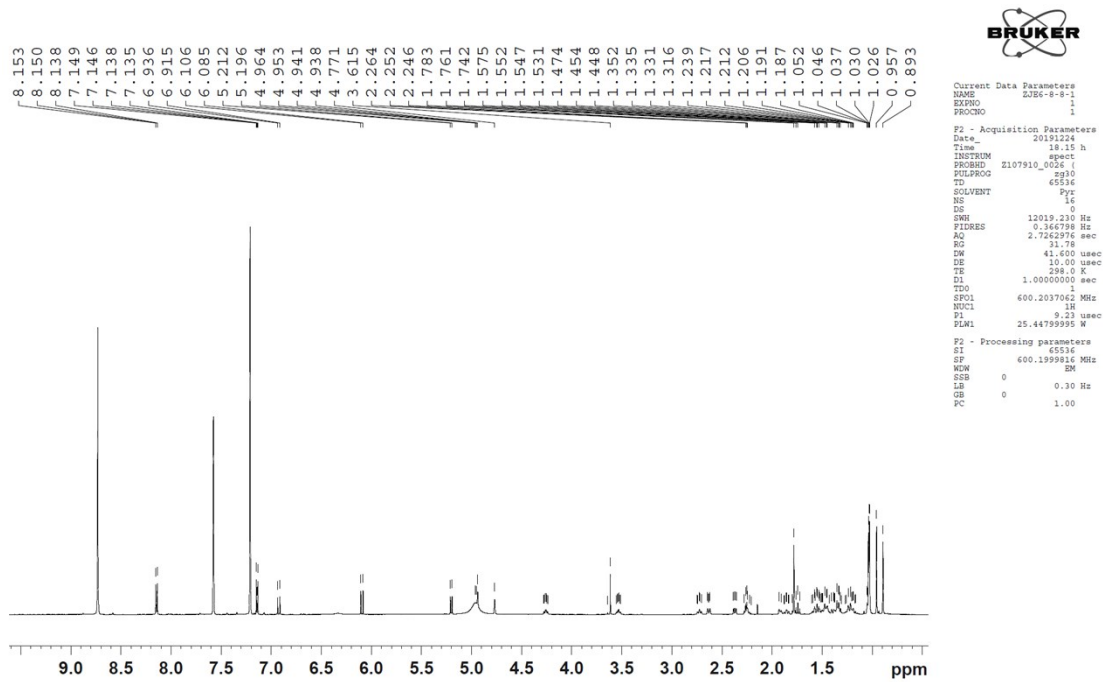

**BRUKER**

```

Current Data Parameters
NAME      Z3B5-8-8-1
EXPNO    1
PROCNO   1

F2 - Acquisition Parameters
Date_    20191224
Time     18.15 h
INSTRUM  spect
PROBHD   zgpg30
PULPROG  zg30
TD        65536
SOLVENT  Pyr
NS        0
DS        0
SWH       12019.230 Hz
FIDRES    0.366798 Hz
AQ        2.7262976 sec
RG        31.78
DW        41.600 usec
DE        10.00 usec
TE        298.0 K
D1        1.00000000 sec
TDO       1
SFO1      600.2037062 MHz
NUC1      1H
D11       9.23 usec
PLW1      25.44798995 W

F2 - Processing parameters
SI        65536
SF        600.1999816 MHz
WDW       EM
SSB       0
LB        0.30 Hz
GB        0
PC        1.00
  
```

412  
413  
414

**Fig. S23.**  $^1\text{H}$  NMR (600MHz,  $\text{C}_5\text{D}_5\text{N}$ ) spectrum of compound 7

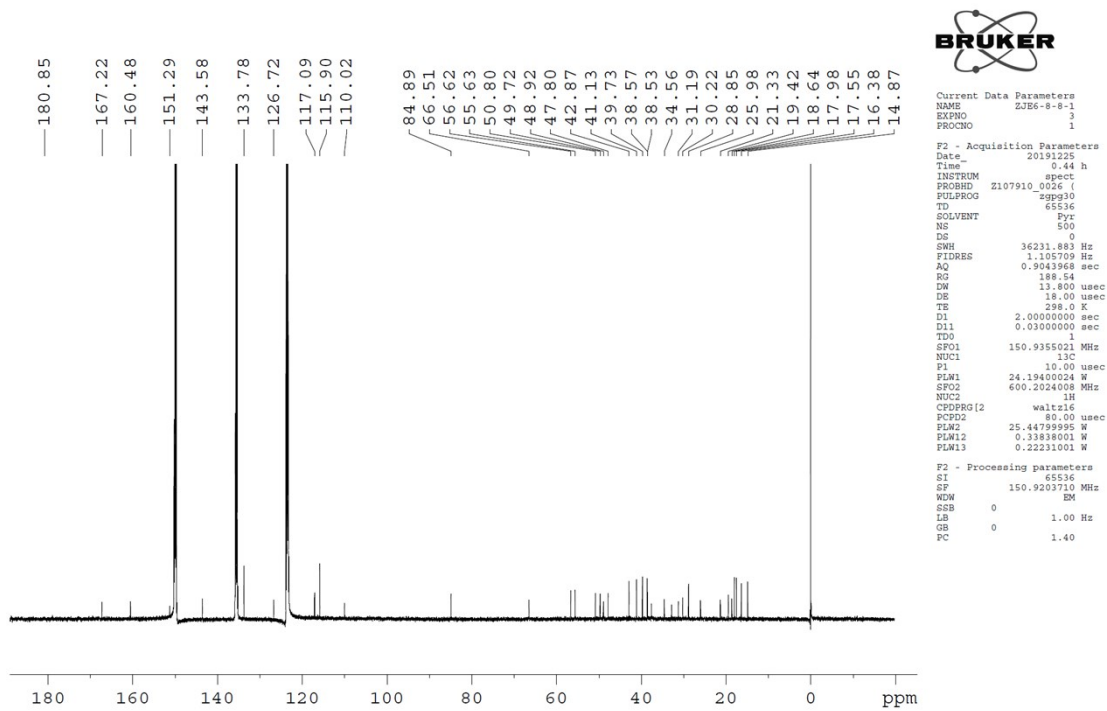

**BRUKER**

```

Current Data Parameters
NAME      Z3B5-8-8-1
EXPNO    3
PROCNO   1

F2 - Acquisition Parameters
Date_    20191225
Time     0.44 h
INSTRUM  spect
PROBHD   zgpg30
PULPROG  zg30
TD        65536
SOLVENT  Pyr
NS        500
DS        0
SWH       36231.883 Hz
FIDRES    1.105709 Hz
AQ        0.2943868 sec
RG        188.54
DW        13.800 usec
DE        18.00 usec
TE        298.0 K
D1        2.00000000 sec
D11       0.03000000 sec
TDO       1
SFO1      150.9355021 MHz
NUC1      13C
D11       10.00 usec
PLW1      24.19400024 W
SFO2      600.2024008 MHz
NUC2      1H
CPDPRG2  waltz16
PCPD2    80.00 usec
PLW2     25.44798995 W
PLW12    0.33838001 W
PLW13    0.22231001 W

F2 - Processing parameters
SI        65536
SF        150.9203710 MHz
WDW       EM
SSB       0
LB        1.00 Hz
GB        0
PC        1.40
  
```

415  
416  
417

**Fig. S24.**  $^{13}\text{C}$  NMR (150MHz,  $\text{C}_5\text{D}_5\text{N}$ ) spectrum of compound 7

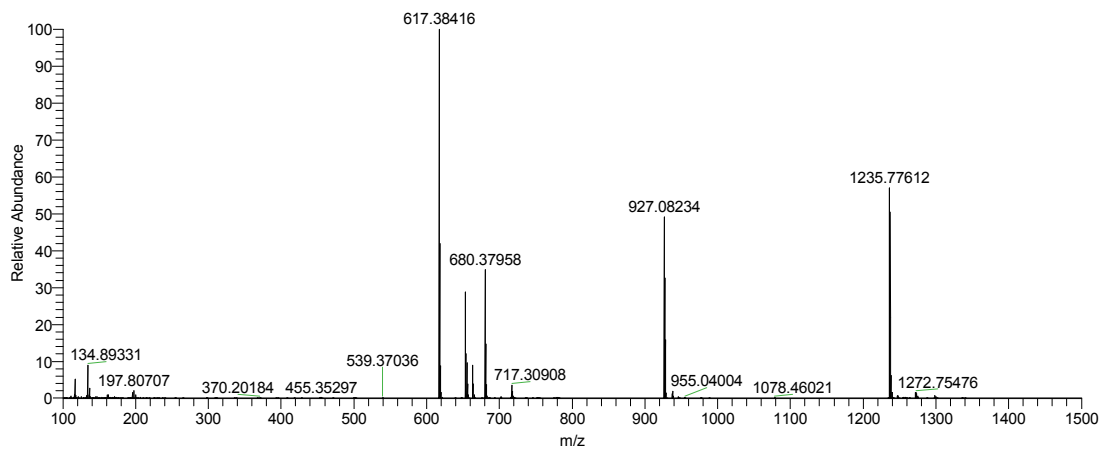

418

419

**Fig. S25.** The ESI-Q-Orbitrap MS spectrum of compound 7

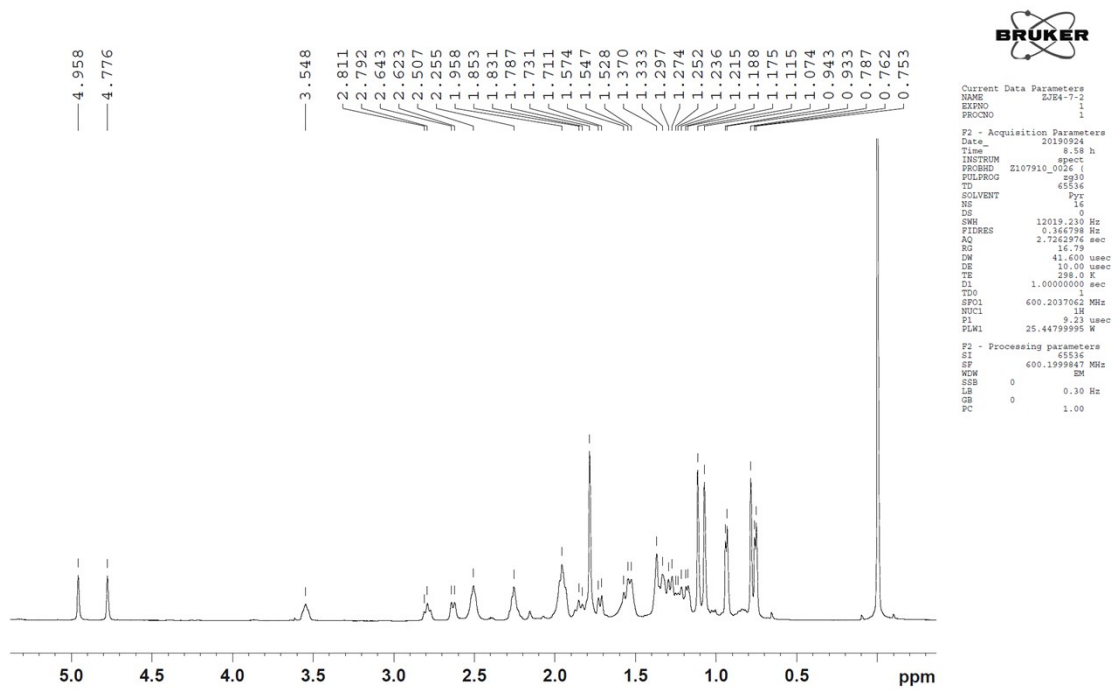

422

423

424

Fig. S26.  $^1\text{H}$  NMR (600MHz,  $\text{C}_5\text{D}_5\text{N}$ ) spectrum of compound 8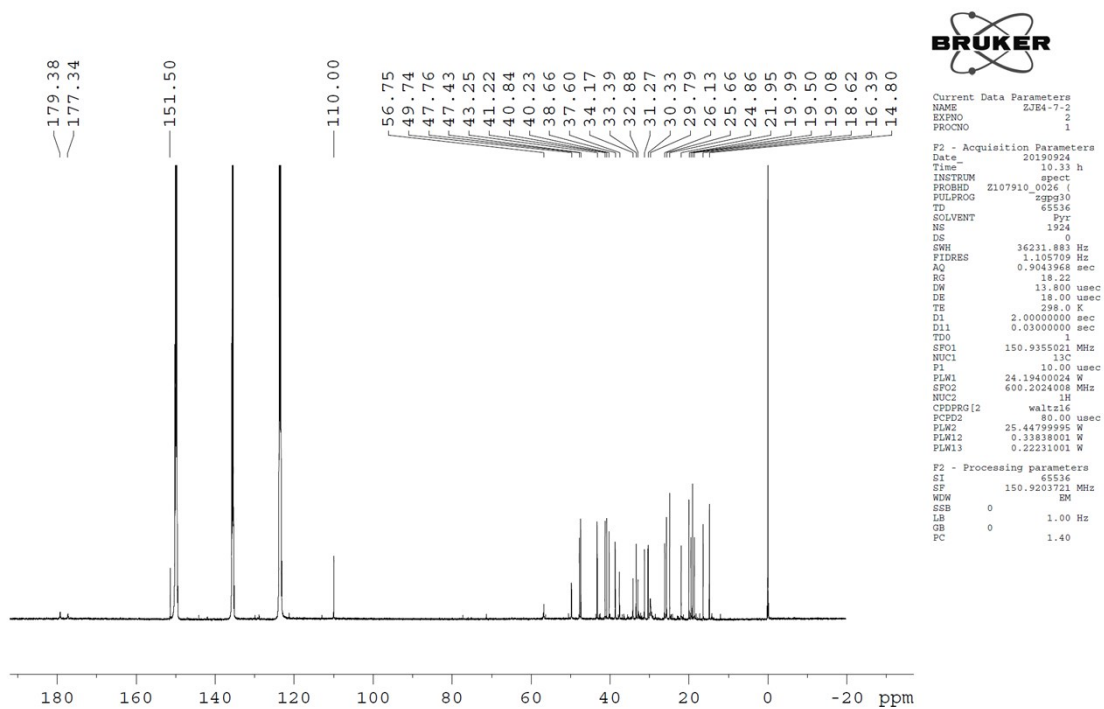

425

426

Fig. S27.  $^{13}\text{C}$  NMR (150MHz,  $\text{C}_5\text{D}_5\text{N}$ ) spectrum of compound 8



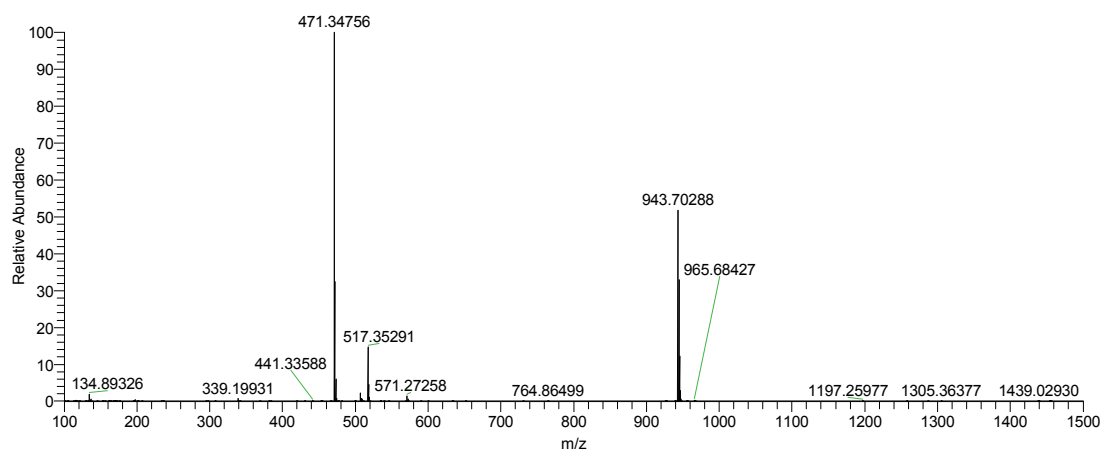

428

429

**Fig. S28.** The ESI-Q-Orbitrap MS spectrum of compound **8**

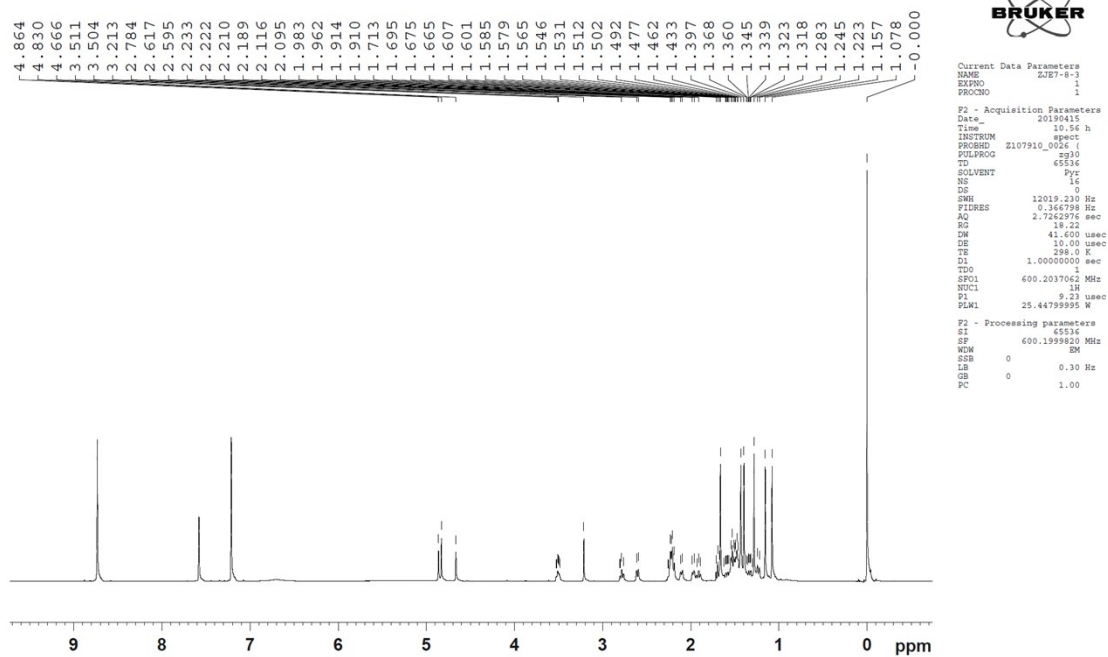

431  
432  
433

Fig. S29. <sup>1</sup>H NMR (600MHz, C<sub>5</sub>D<sub>5</sub>N) spectrum of compound 9

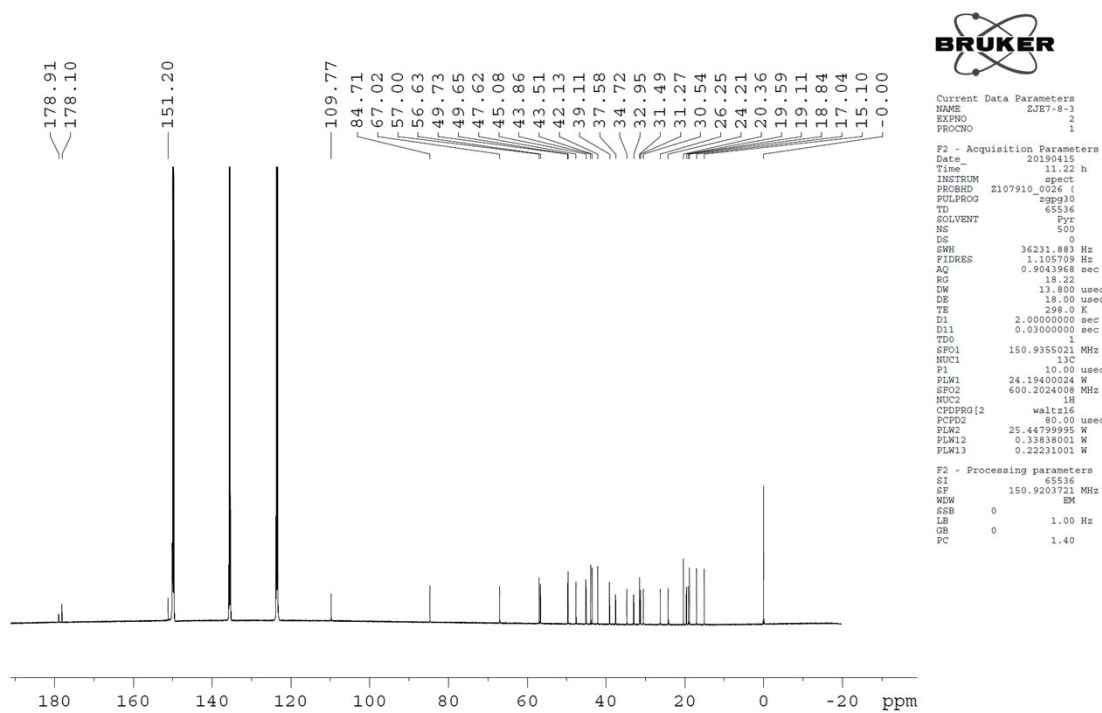

434  
435  
436

Fig. S30. <sup>13</sup>C NMR (150MHz, C<sub>5</sub>D<sub>5</sub>N) spectrum of compound 9

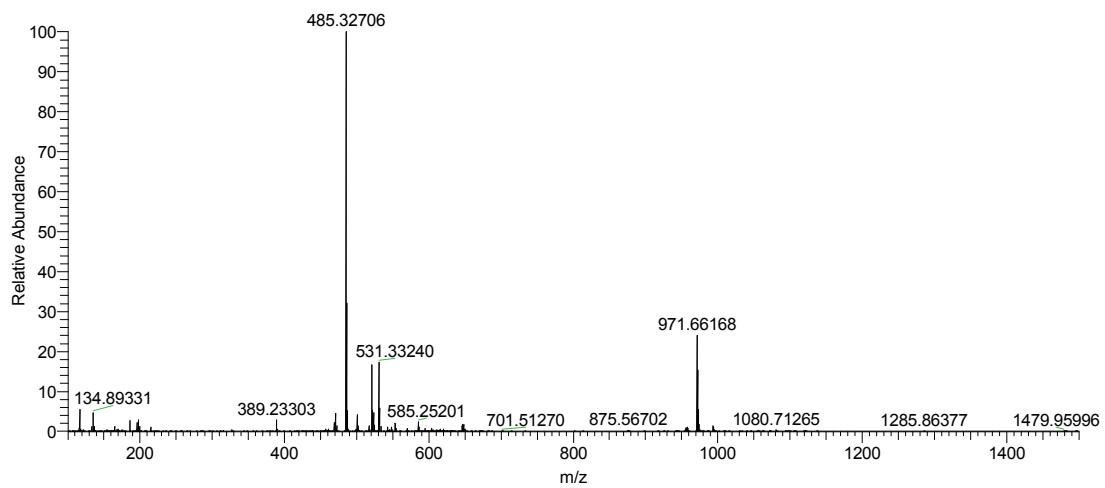

437  
438  
439

**Fig. S31.** The ESI-Q-Orbitrap MS spectrum of compound **9**

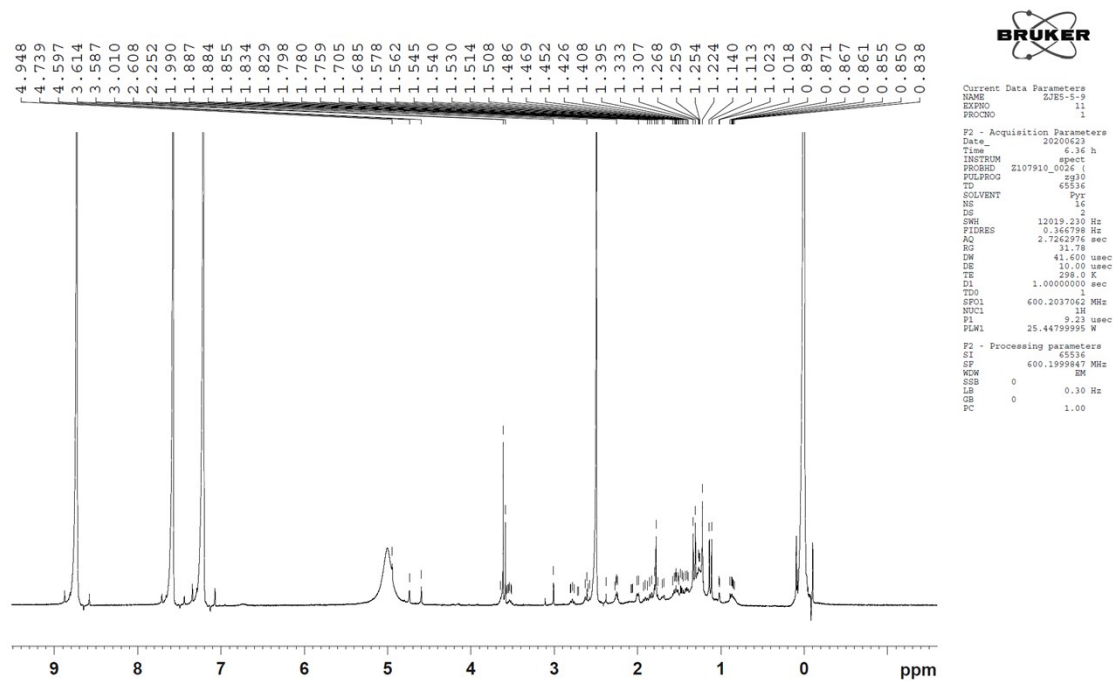

**BRUKER**

```

Current Data Parameters
NAME      ZRES-5-9
EXPNO    1
PROCNO   1

F2 - Acquisition Parameters
Date_    20200623
Time     6.36 h
INSTRUM  spect
PROBHD   Z107910_0025 (
PULPROG  zgpg30
TD        65536
SOLVENT  Pyr
NS        16
DS        2
SWH       12019.230 Hz
FIDRES    0.366798 Hz
AQ        2.7262976 sec
RG        31.78
DM        41.600 usec
DE        10.00 usec
TE        298.0 K
D1        1.00000000 sec
TDO       0
SFO1      600.2037062 MHz
NUC1      1H
P1        9.23 usec
PLM1      25.44799995 W

F2 - Processing parameters
SI        65536
SF        600.1999847 MHz
WDW       EM
SSB       0
LB        0.10 Hz
GB        0
PC        1.00
  
```

441  
442  
443

Fig. S32. <sup>1</sup>H NMR (600MHz, C<sub>5</sub>D<sub>5</sub>N) spectrum of compound 10

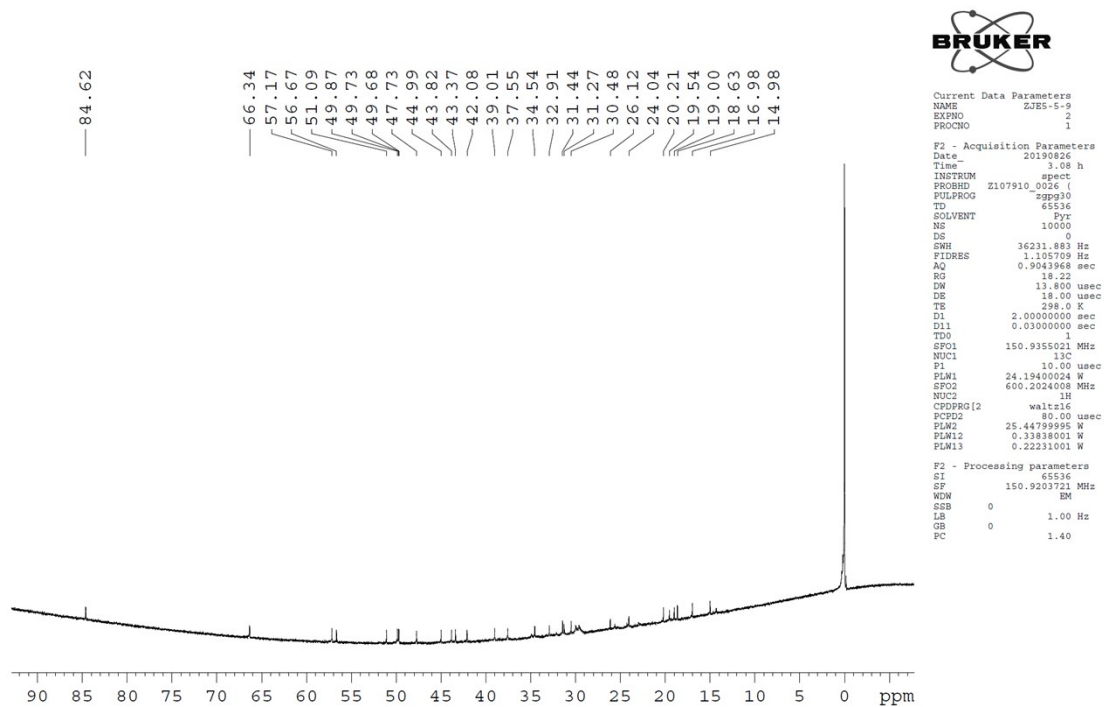

**BRUKER**

```

Current Data Parameters
NAME      ZRES-5-9
EXPNO    2
PROCNO   1

F2 - Acquisition Parameters
Date_    20190826
Time     3.08 h
INSTRUM  spect
PROBHD   Z107910_0026 (
PULPROG  zgpg30
TD        65536
SOLVENT  Pyr
NS        10000
DS        0
SWH       36231.883 Hz
FIDRES    1.105709 Hz
AQ        0.9043988 sec
RG        18.22
DM        13.800 usec
DE        18.00 usec
TE        298.0 K
D1        2.00000000 sec
D11       0.03000000 sec
TDO       1
SFO1      150.9355021 MHz
NUC1      13C
P1        10.00 usec
PLM1      24.19400024 W
SFO2      600.2024008 MHz
NUC2      1H
CPDPRG2  waltz16
PCPD2     80.00 usec
PLM2      25.44799995 W
PLM12     0.33838001 W
PLM13     0.22331001 W

F2 - Processing parameters
SI        65536
SF        150.9203721 MHz
WDW       EM
SSB       0
LB        1.00 Hz
GB        0
PC        1.40
  
```

444  
445  
446

Fig. S33. <sup>13</sup>C NMR (150MHz, C<sub>5</sub>D<sub>5</sub>N) spectrum-1 of compound 10

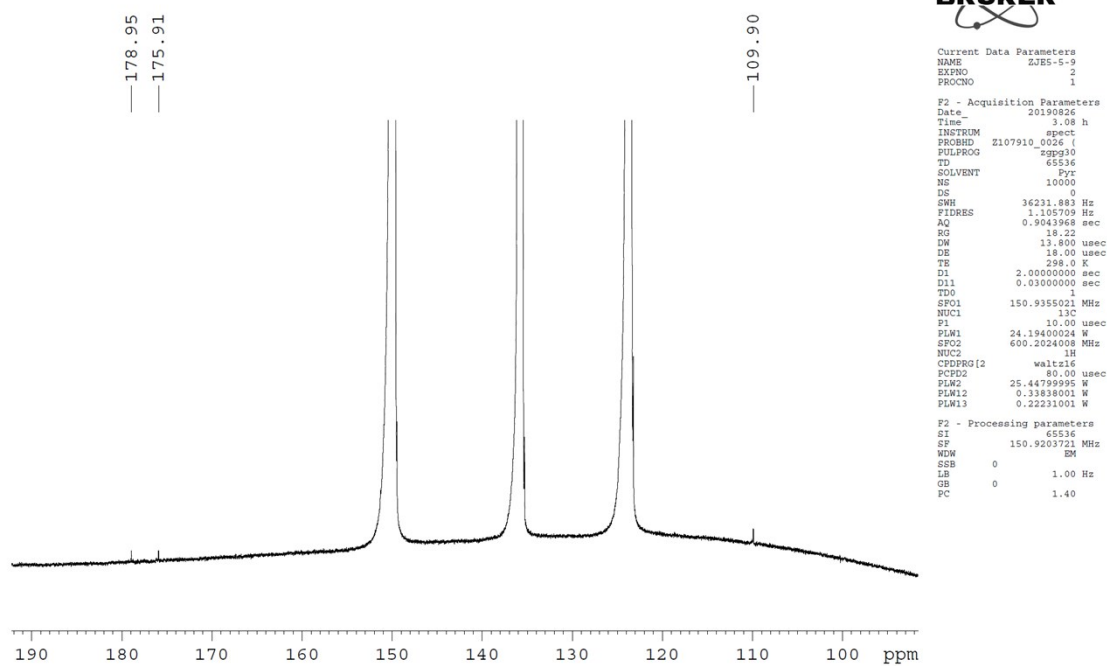

447

Fig. S34.  $^{13}\text{C}$  NMR (150MHz,  $\text{C}_5\text{D}_5\text{N}$ ) spectrum-2 of compound **10**

448

449

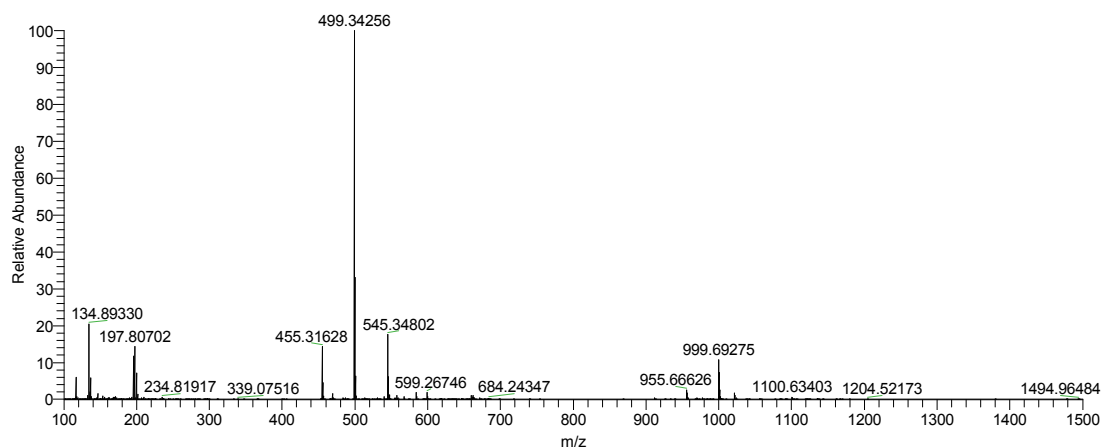

450

Fig. S35. The ESI-Q-Orbitrap MS spectrum of compound **10**

451

452

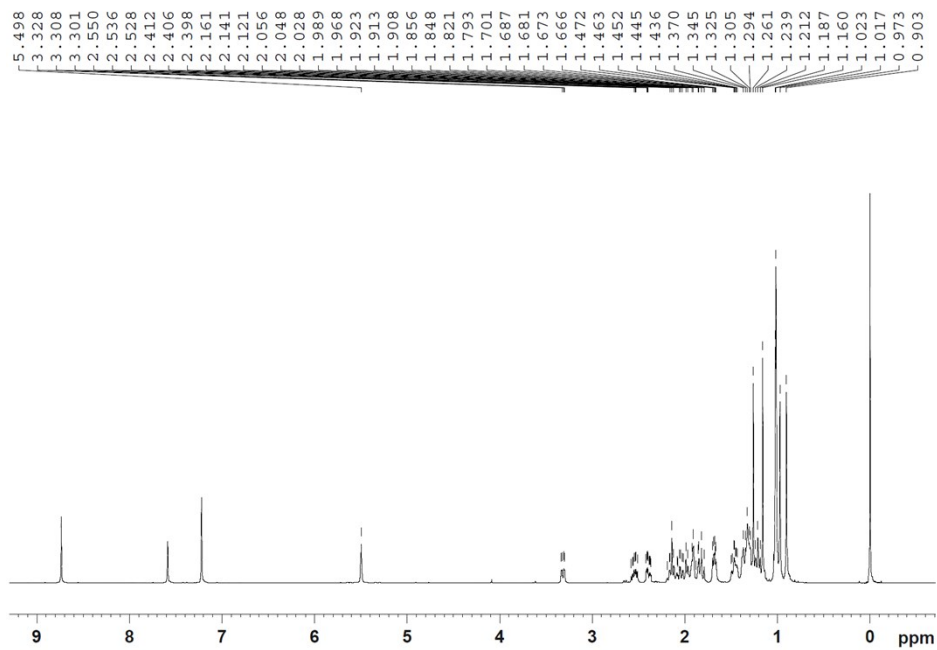

**BRUKER**

Current Data Parameters  
 NAME ZJ84-6-3-1  
 EXPNO 1  
 PROCNO 1

F2 - Acquisition Parameters  
 Date\_ 20191217  
 Time 21.09 h  
 INSTRUM spect  
 FPROBRD Z113652\_0101 (1  
 PULPROG zgpg30  
 TD 65536  
 SOLVENT Pyr  
 NS 16  
 DS 0  
 SWH 10000.000 Hz  
 FIDRES 0.105176 Hz  
 AQ 3.2767999 sec  
 RG 32  
 DW 50.000 usec  
 DE 8.00 usec  
 TE 295.3 K  
 TI 1.0000000 sec  
 TDO 1  
 SFO1 500.1310083 MHz  
 NUC1 1H  
 PL 32.28 usec  
 PLW1 15.19999981 W

F2 - Processing parameters  
 SI 65536  
 SF 500.1299998 MHz  
 WDN 0 EM  
 SSB 0  
 LB 0.30 Hz  
 GB 0  
 PC 1.00

454  
455  
456

Fig. S36. <sup>1</sup>H NMR (500MHz, C<sub>5</sub>D<sub>5</sub>N) spectrum of compound 11

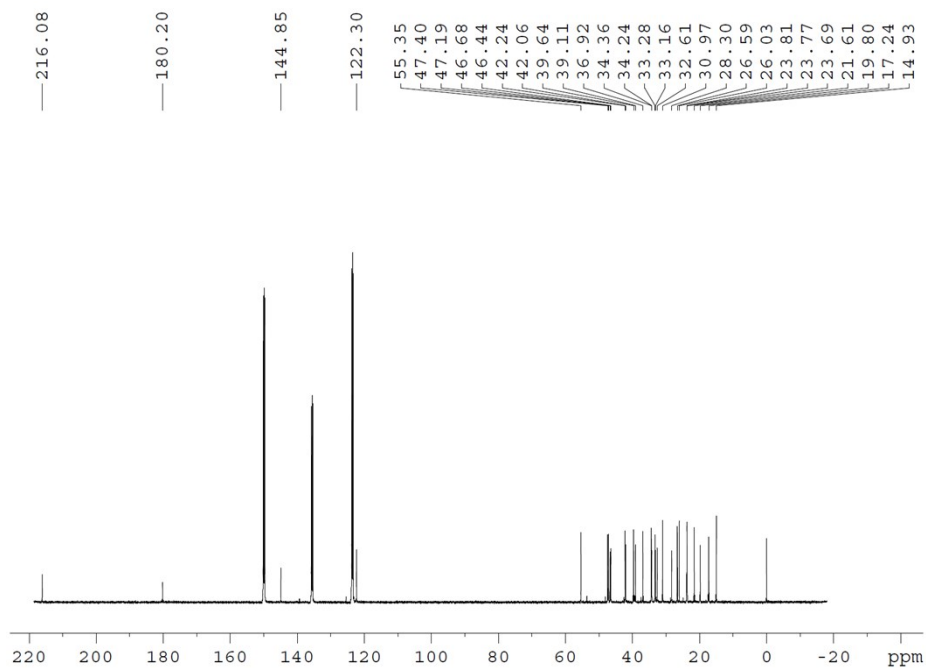

**BRUKER**

Current Data Parameters  
 NAME ZJ84-6-3-1  
 EXPNO 3  
 PROCNO 1

F2 - Acquisition Parameters  
 Date\_ 20191217  
 Time 23.24 h  
 INSTRUM spect  
 FPROBRD Z113652\_0101 (1  
 PULPROG zgpg30  
 TD 65536  
 SOLVENT Pyr  
 NS 512  
 DS 0  
 SWH 29761.904 Hz  
 FIDRES 0.908261 Hz  
 AQ 1.1010048 sec  
 RG 203  
 DW 16.800 usec  
 DE 8.00 usec  
 TE 295.0 K  
 D1 2.0000000 sec  
 D11 0.0300000 sec  
 TDO 1  
 SFO1 125.7703641 MHz  
 NUC1 13C  
 PL 13.00 usec  
 PLW1 94.0000000 W  
 SFO2 500.1320005 MHz  
 NUC2 1H  
 CPDPRG2 waltz16  
 PCPD2 80.00 usec  
 PLW2 15.20499992 W  
 PLW12 0.35826001 W  
 PLW13 0.18020000 W

F2 - Processing parameters  
 SI 32768  
 SF 125.7577594 MHz  
 WDN 0 EM  
 SSB 0  
 LB 1.00 Hz  
 GB 0  
 PC 1.40

457  
458  
459

Fig. S37. <sup>13</sup>C NMR (125MHz, C<sub>5</sub>D<sub>5</sub>N) spectrum of compound 11

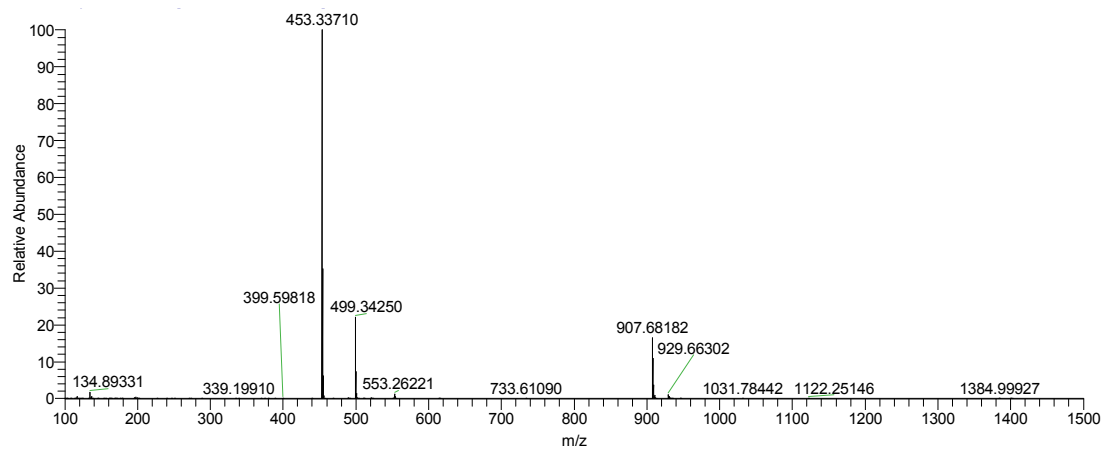

460  
461  
462

**Fig. S38.** The ESI-Q-Orbitrap MS spectrum of compound **11**

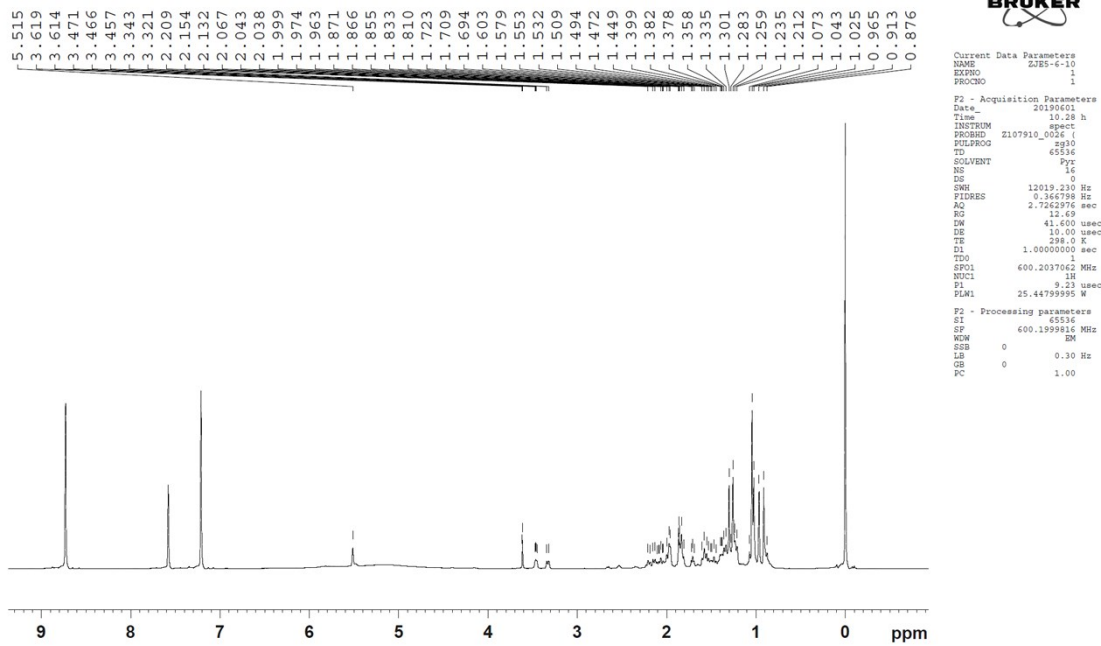

464

465

466

Fig. S39.  $^1\text{H}$  NMR (600MHz,  $\text{C}_5\text{D}_5\text{N}$ ) spectrum of compound 12

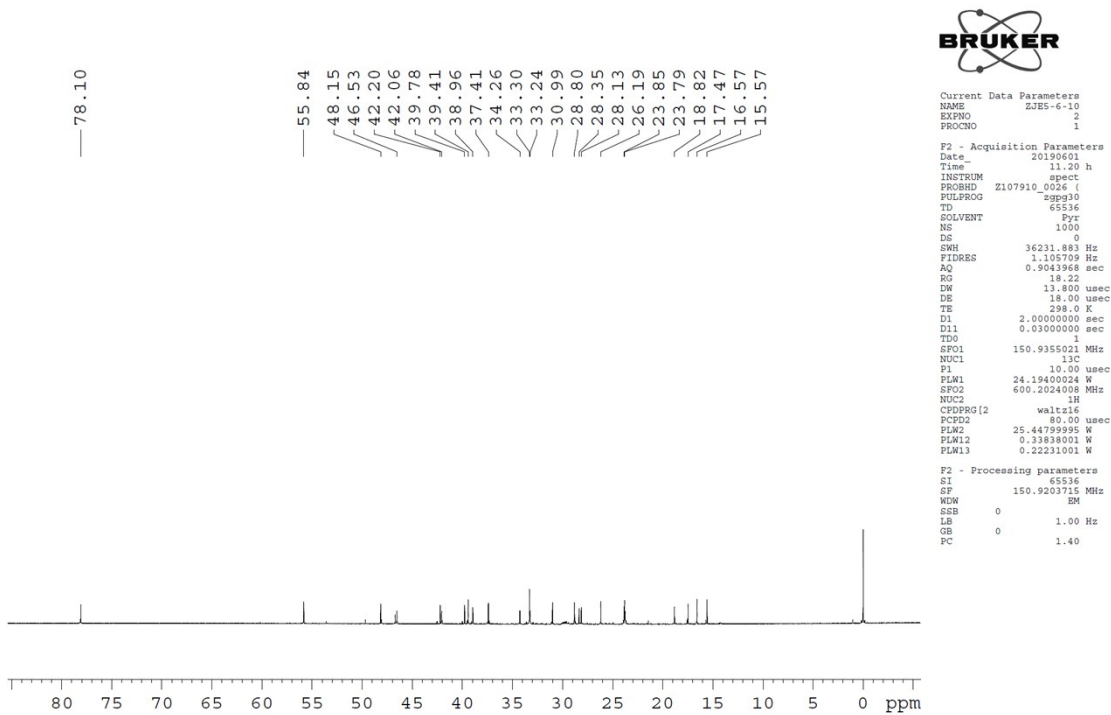

467

468

469

Fig. S40.  $^{13}\text{C}$  NMR (150MHz,  $\text{C}_5\text{D}_5\text{N}$ ) spectrum-1 of compound 12



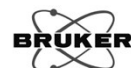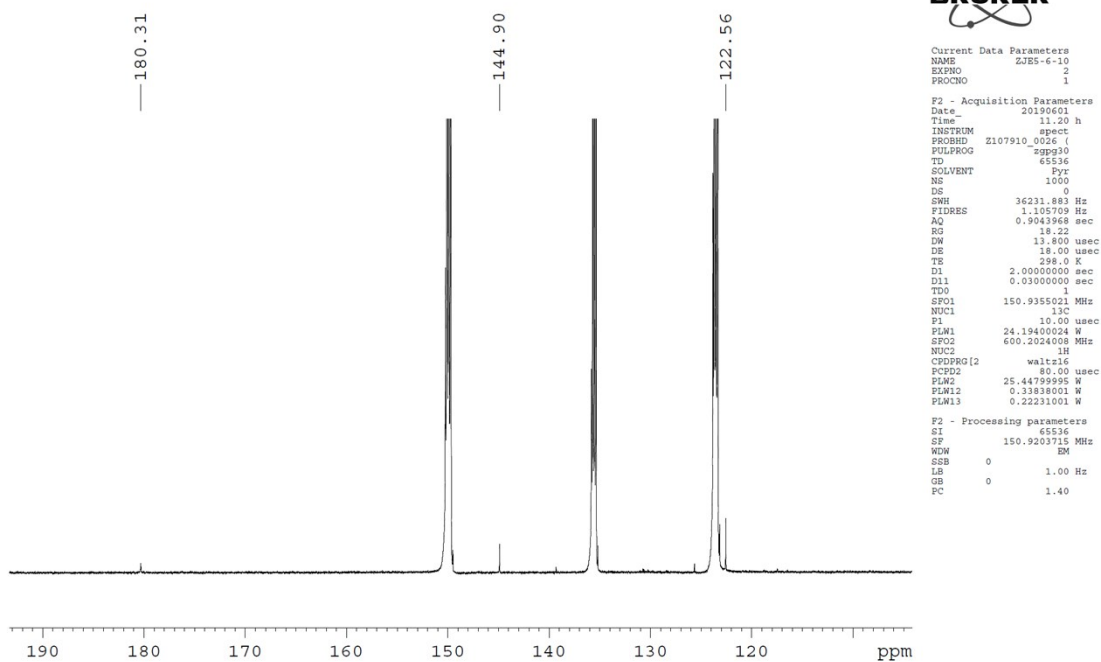

470  
471  
472

Fig. S41. <sup>13</sup>C NMR (150MHz, C<sub>5</sub>D<sub>5</sub>N) spectrum-2 of compound 12

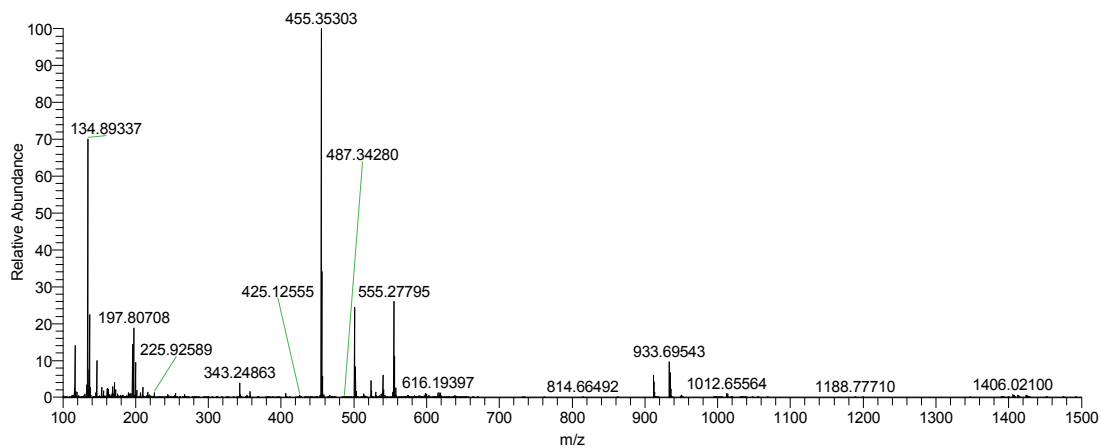

473  
474  
475

Fig. S42. The ESI-Q-Orbitrap MS spectrum of compound 12

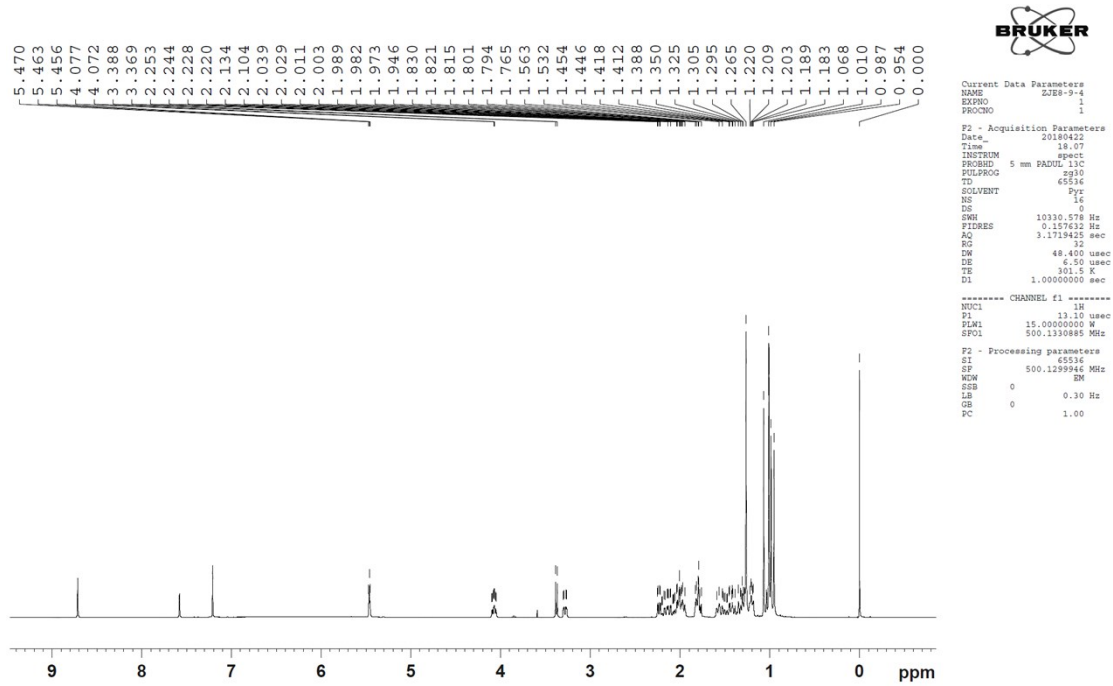

477  
478  
479

Fig. S43. <sup>1</sup>H NMR (500MHz, C<sub>5</sub>D<sub>5</sub>N) spectrum of compound 13

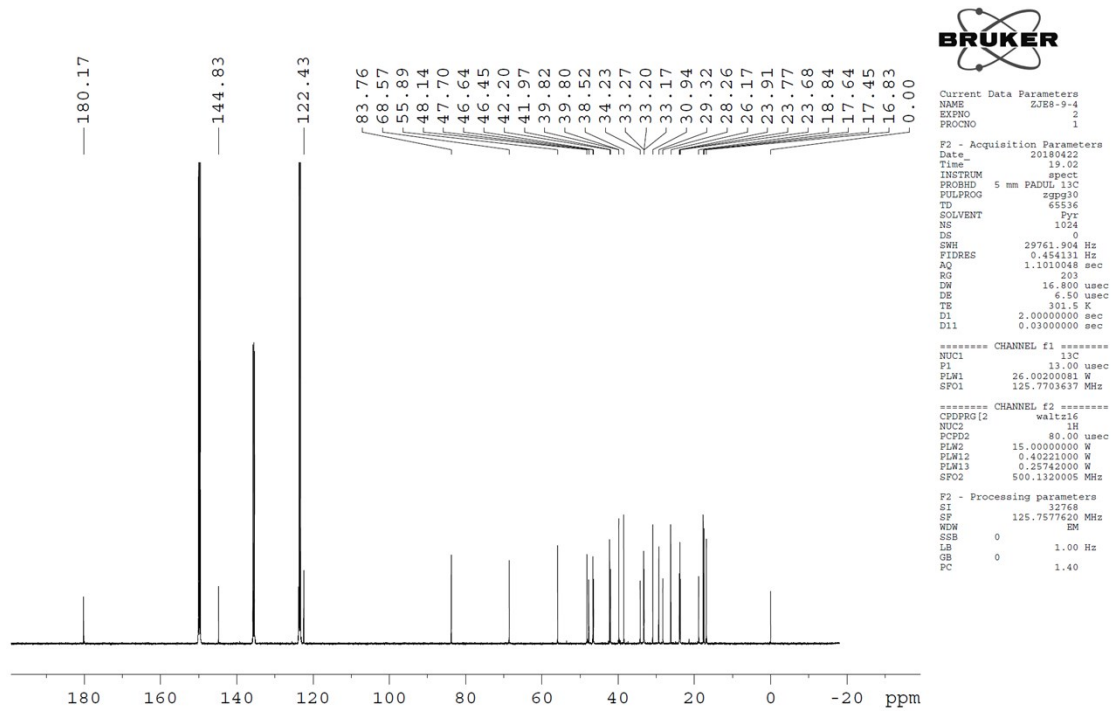

480  
481  
482

Fig. S44. <sup>13</sup>C NMR (125MHz, C<sub>5</sub>D<sub>5</sub>N) spectrum of compound 13

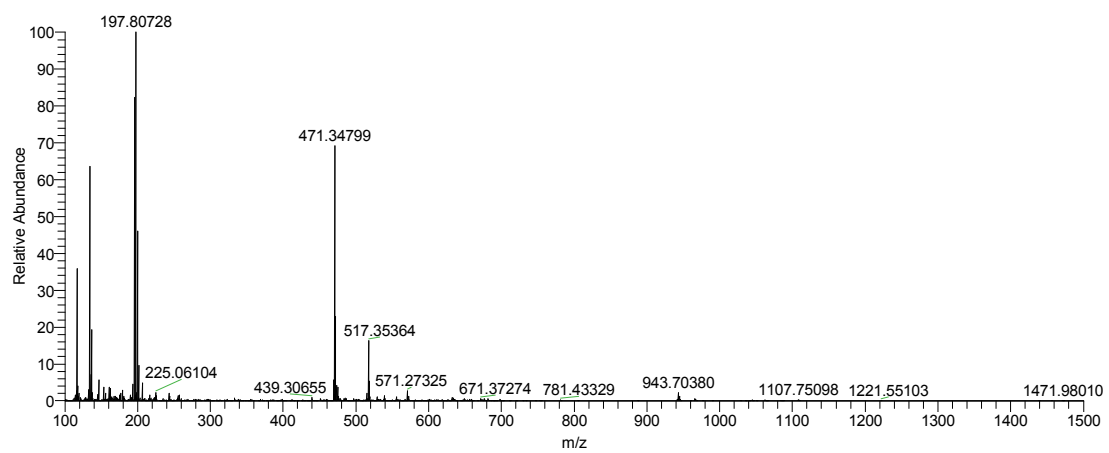

483

484

485

**Fig. S45.** The ESI-Q-Orbitrap MS spectrum of compound **13**

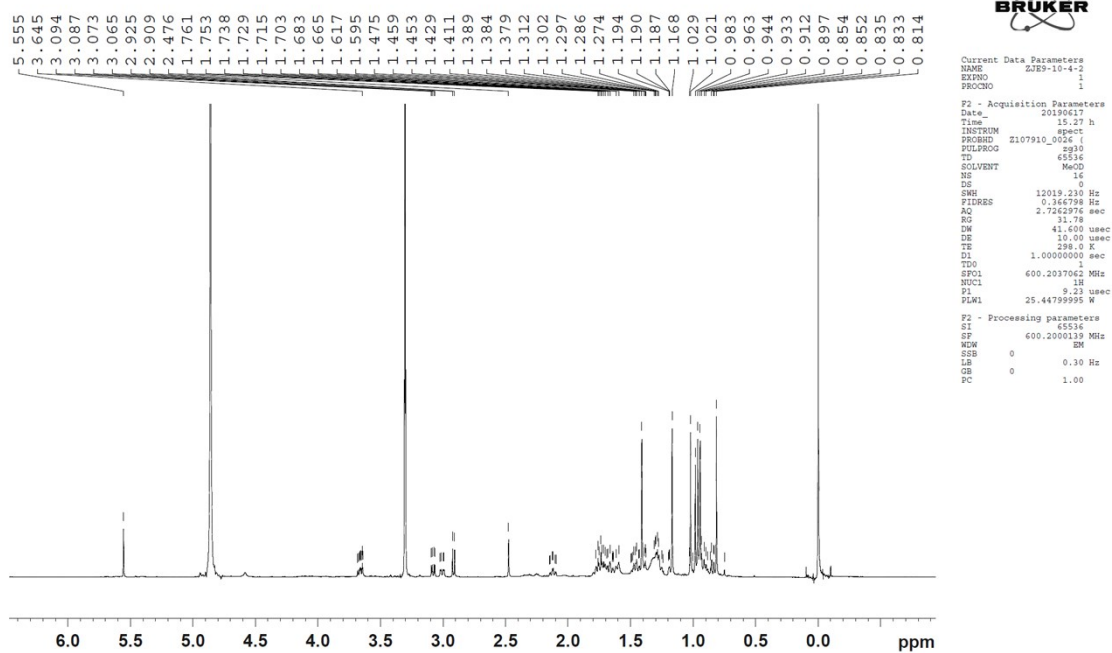

487  
488  
489

Fig. S46. <sup>1</sup>H NMR (600MHz, CD<sub>3</sub>OD) spectrum of compound 14

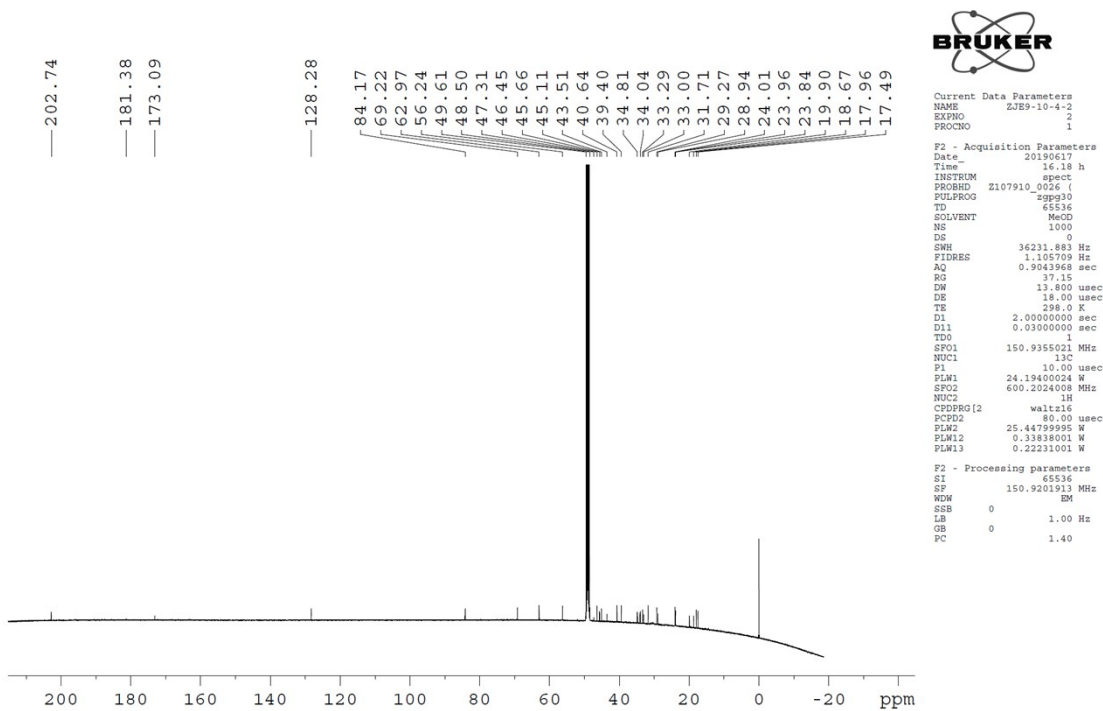

490  
491  
492

Fig. S47. <sup>13</sup>C NMR (150MHz, CD<sub>3</sub>OD) spectrum of compound 14

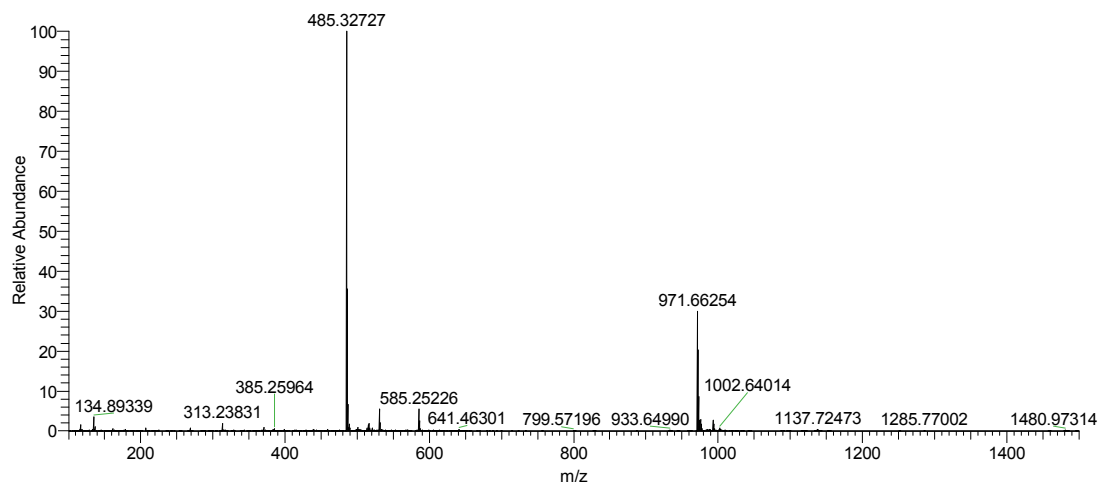

493  
494  
495

**Fig. S48.** The ESI-Q-Orbitrap MS spectrum of compound **14**

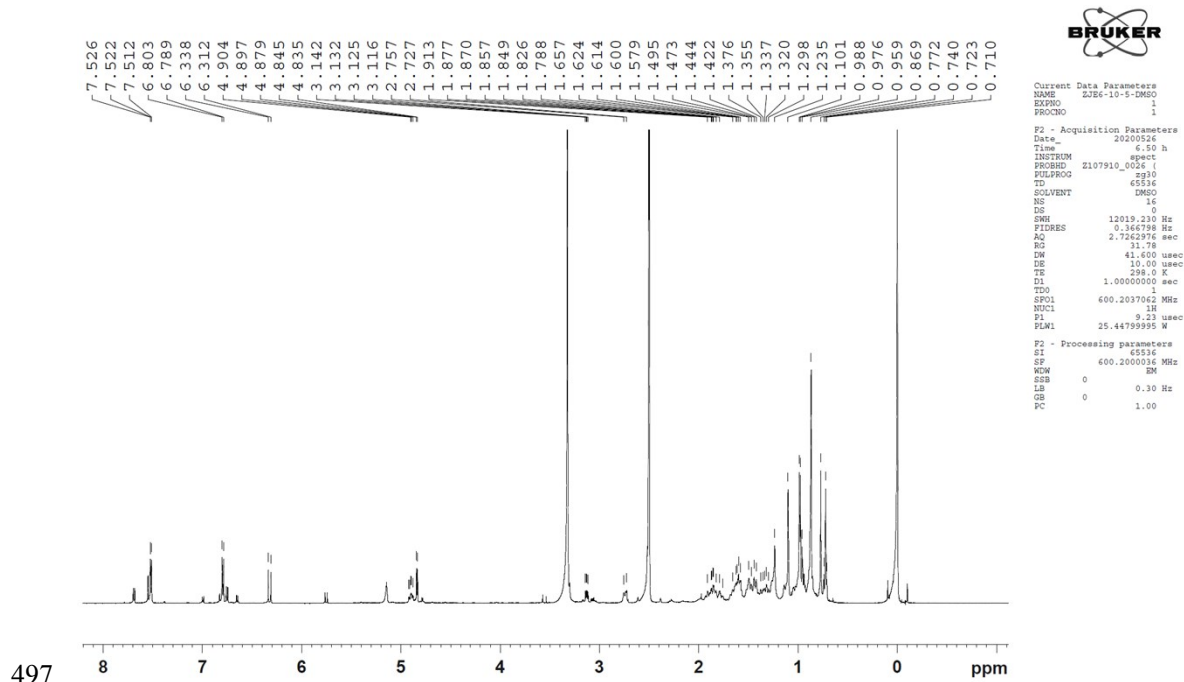

497  
498  
499

Fig. S49. <sup>1</sup>H NMR (600MHz, DMSO-*d*<sub>6</sub>) spectrum of compound 15

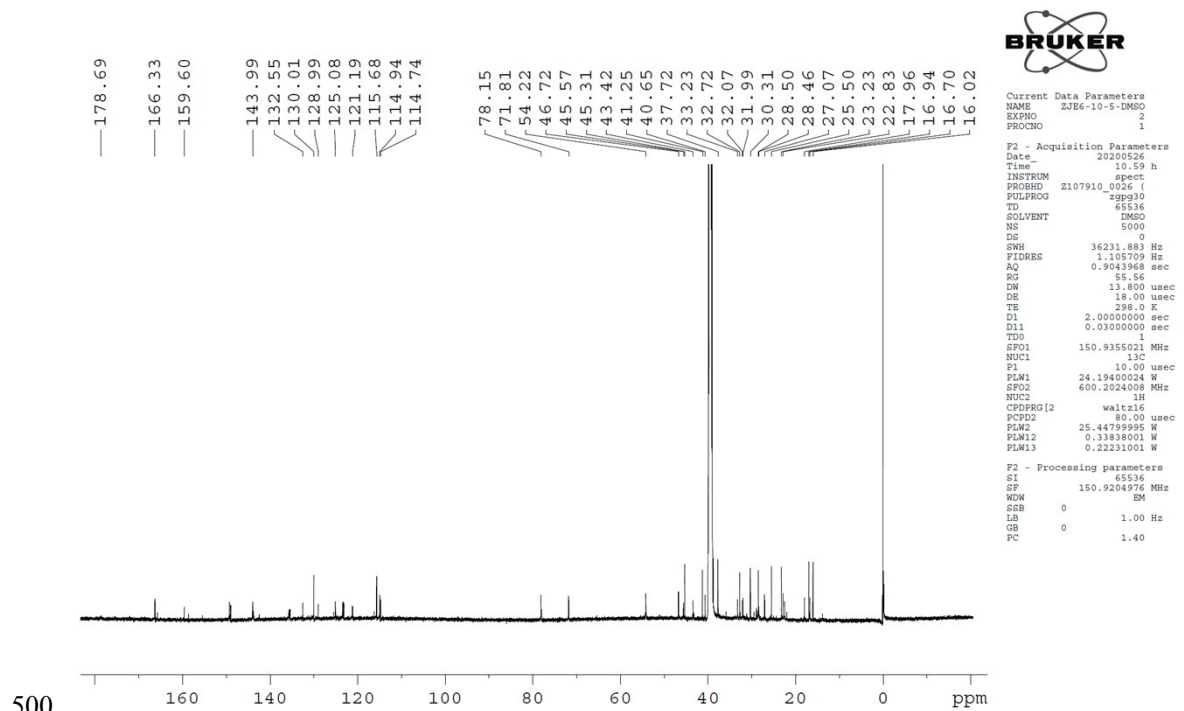

500  
501  
502

Fig. S50. <sup>13</sup>C NMR (150MHz, DMSO-*d*<sub>6</sub>) spectrum of compound 15

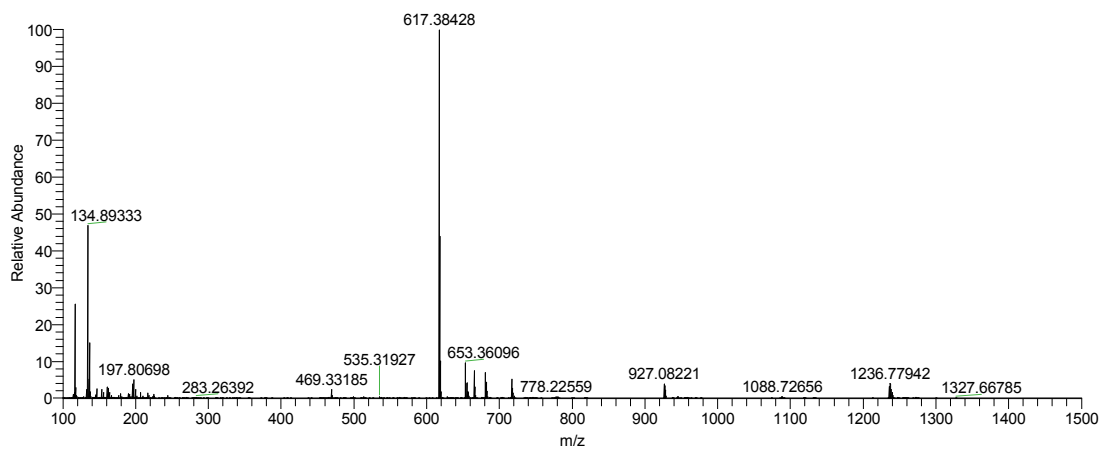

503  
504

**Fig. S51.** The ESI-Q-Orbitrap MS spectrum of compound **15**

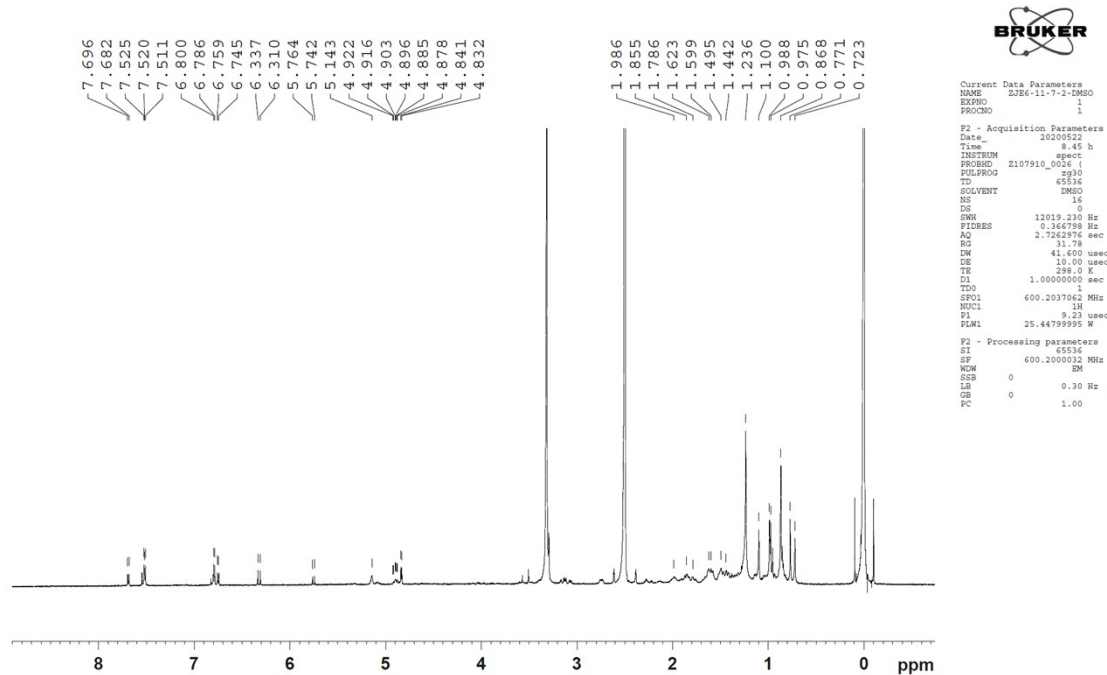

507

508

509

Fig. S52.  $^1\text{H}$  NMR (600MHz,  $\text{DMSO-}d_6$ ) spectrum of compound 16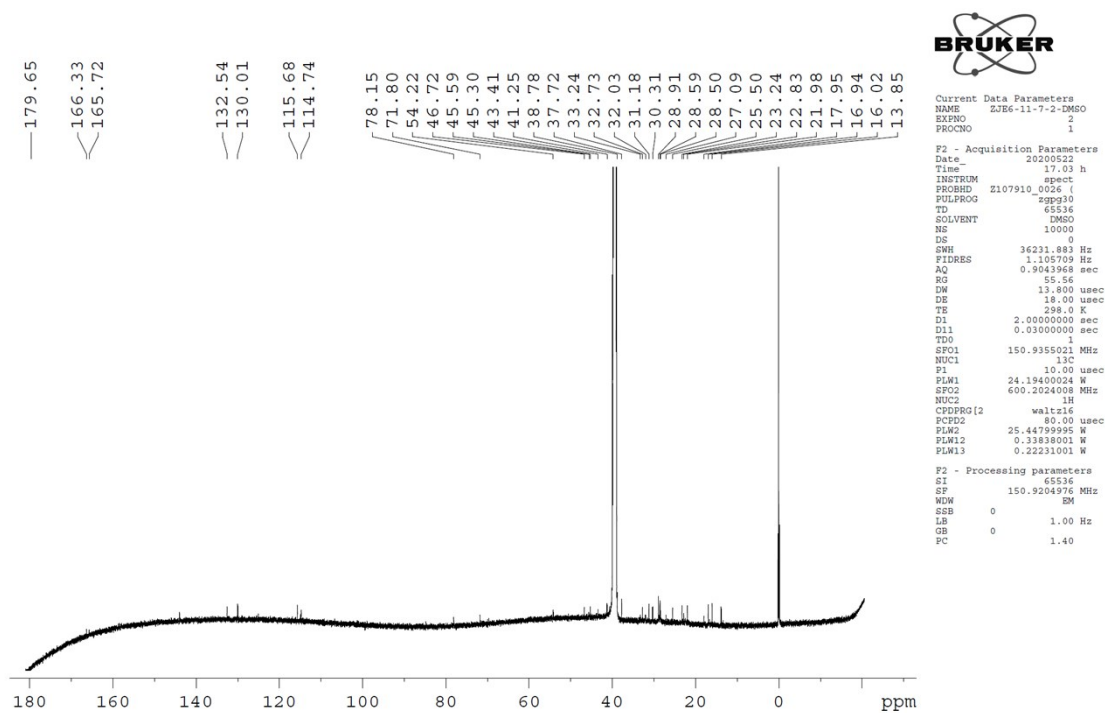

510

511

512

Fig. S53.  $^{13}\text{C}$  NMR (150MHz,  $\text{DMSO-}d_6$ ) spectrum of compound 16



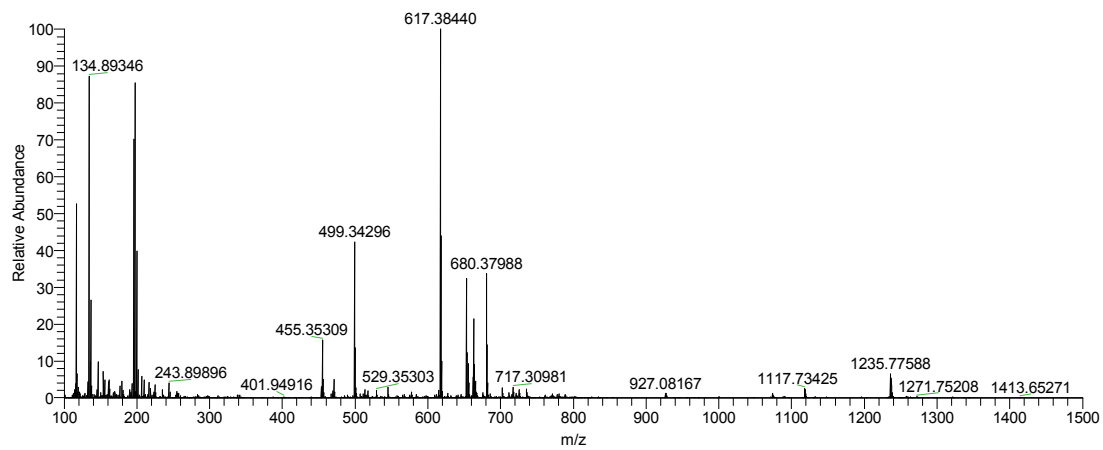

513  
514  
515

**Fig. S54.** The ESI-Q-Orbitrap MS spectrum of compound **16**

517

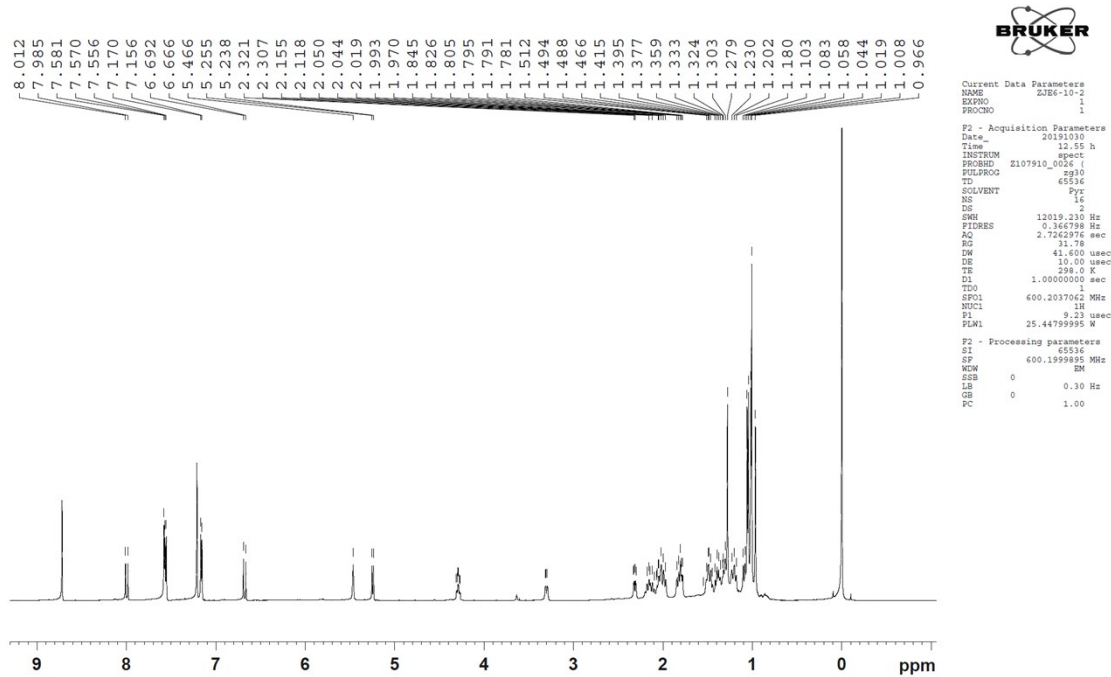

518

519

520

Fig. S55.  $^1\text{H}$  NMR (600MHz,  $\text{C}_5\text{D}_5\text{N}$ ) spectrum of compound 17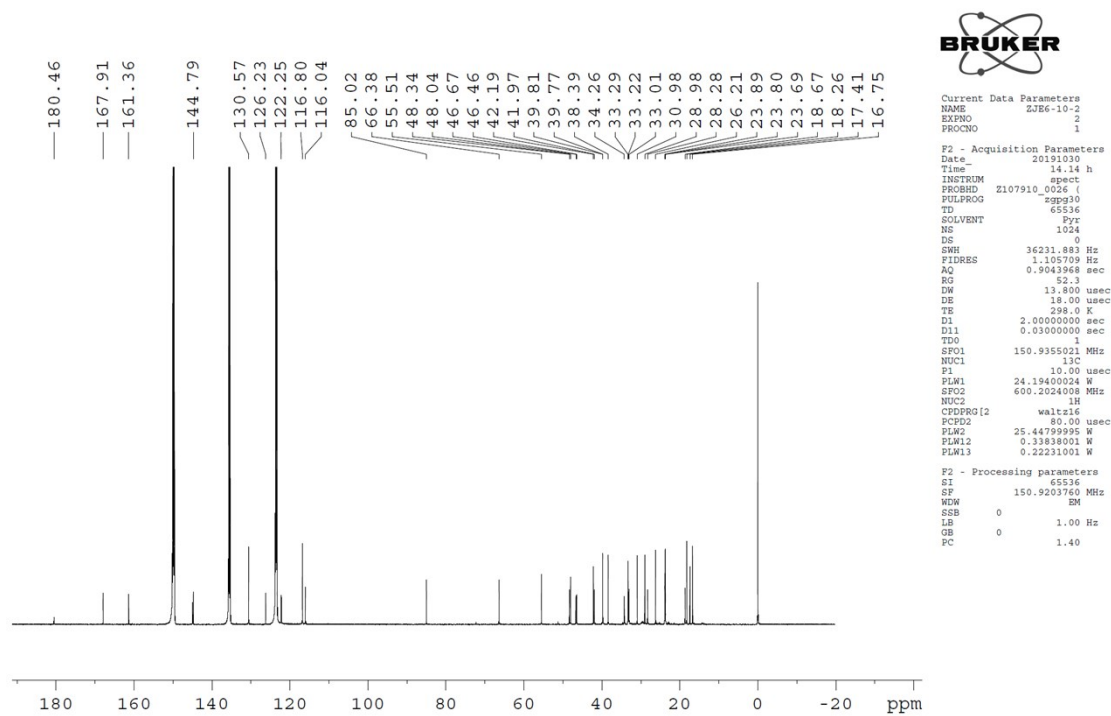

521

522

523

Fig. S56.  $^{13}\text{C}$  NMR (150MHz,  $\text{C}_5\text{D}_5\text{N}$ ) spectrum of compound 17

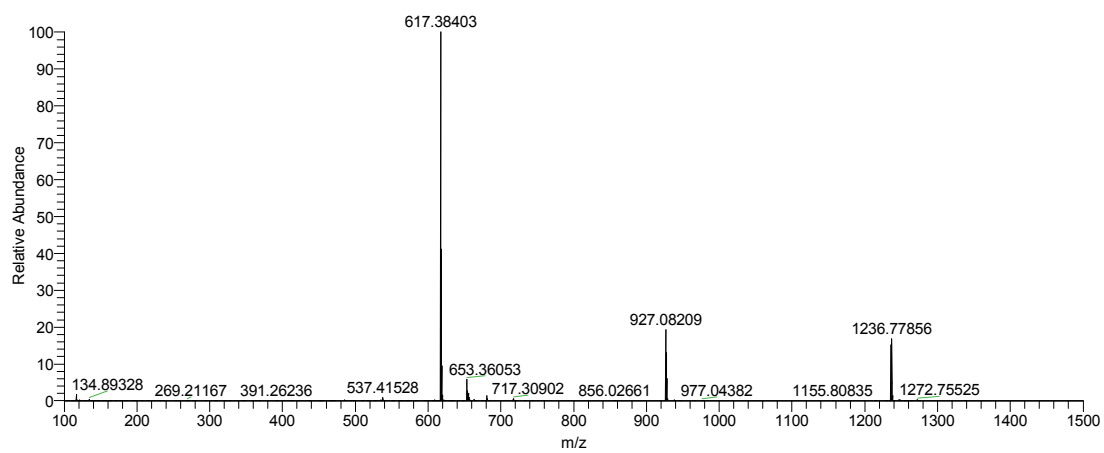

524  
525  
526

**Fig. S57.** The ESI-Q-Orbitrap MS spectrum of compound **17**

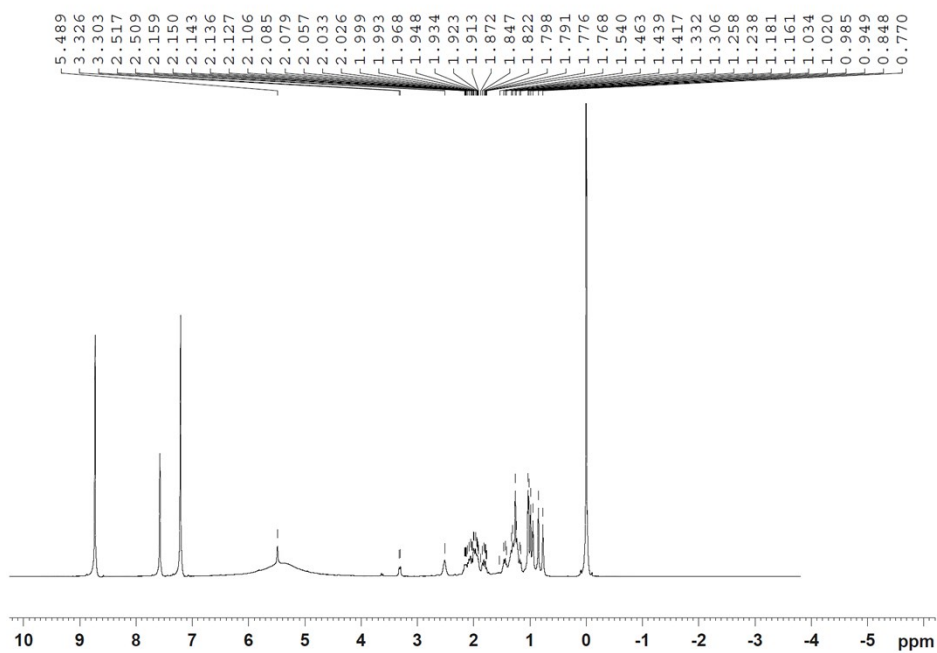

Fig. S58. <sup>1</sup>H NMR (600MHz, C<sub>5</sub>D<sub>5</sub>N) spectrum of compound 18

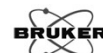

```

Current Data Parameters
NAME          ZIES-6-5
EXPNO        1
PROCNO       1

F2 - Acquisition Parameters
Date_        20190530
Time         9.40 h
INSTRUM     spect
PROBHD      Z107910_0026
PULPROG     zg30
TD          65536
SOLVENT     Pyr
NS          16
DS          0
SWH         12019.230 Hz
FIDRES     0.146798 Hz
AQ         2.7262976 sec
RG         16.79
DM         41.600 usec
DE         298.0 K
TE         1.00000000 sec
D1         1.00000000 sec
TDO        0
SFO1       600.2037062 MHz
NUC1       1H
P1         9.23 usec
PLW1       25.4479995 W

F2 - Processing parameters
SI         65536
SF         600.1999822 MHz
WDW        EM
SSB        0
LB         0.10 Hz
GB         0
PC         1.00
  
```

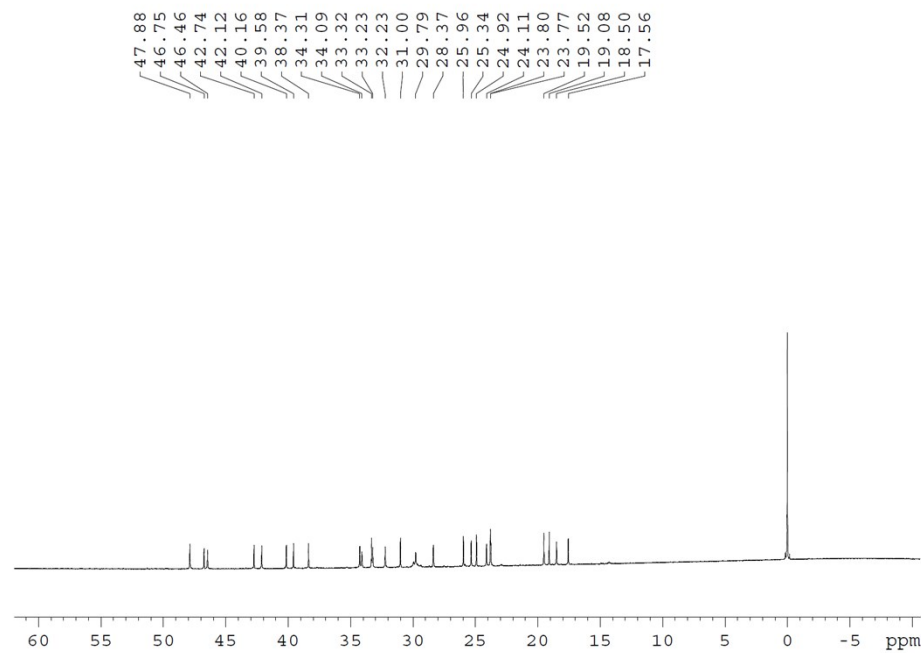

Fig. S59. <sup>13</sup>C NMR (150MHz, C<sub>5</sub>D<sub>5</sub>N) spectrum-1 of compound 18

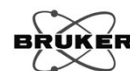

```

Current Data Parameters
NAME          ZIES-6-5
EXPNO        2
PROCNO       1

F2 - Acquisition Parameters
Date_        20190530
Time         17.56 h
INSTRUM     spect
PROBHD      Z107910_0026
PULPROG     zgpg30
TD          65536
SOLVENT     Pyr
NS          10000
DS          0
SWH         36231.883 Hz
FIDRES     1.105709 Hz
AQ         0.8043968 sec
RG         18.22
DM         12.800 usec
DE         18.00 usec
TE         298.0 K
D1         2.00000000 sec
D11        0.03000000 sec
TDO        1
SFO1       150.9355021 MHz
NUC1       13C
P1         10.00 usec
PLW1       24.19400024 W
SFO2       600.2024008 MHz
NUC2       1H
CPDPRG[2]   waltz16
PCPD2       80.00 usec
PLW2       25.44799995 W
PLW12      0.33838001 W
PLW13      0.22231001 W

F2 - Processing parameters
SI         65536
SF         150.9203704 MHz
WDW        EM
SSB        0
LB         1.00 Hz
GB         0
PC         1.40
  
```

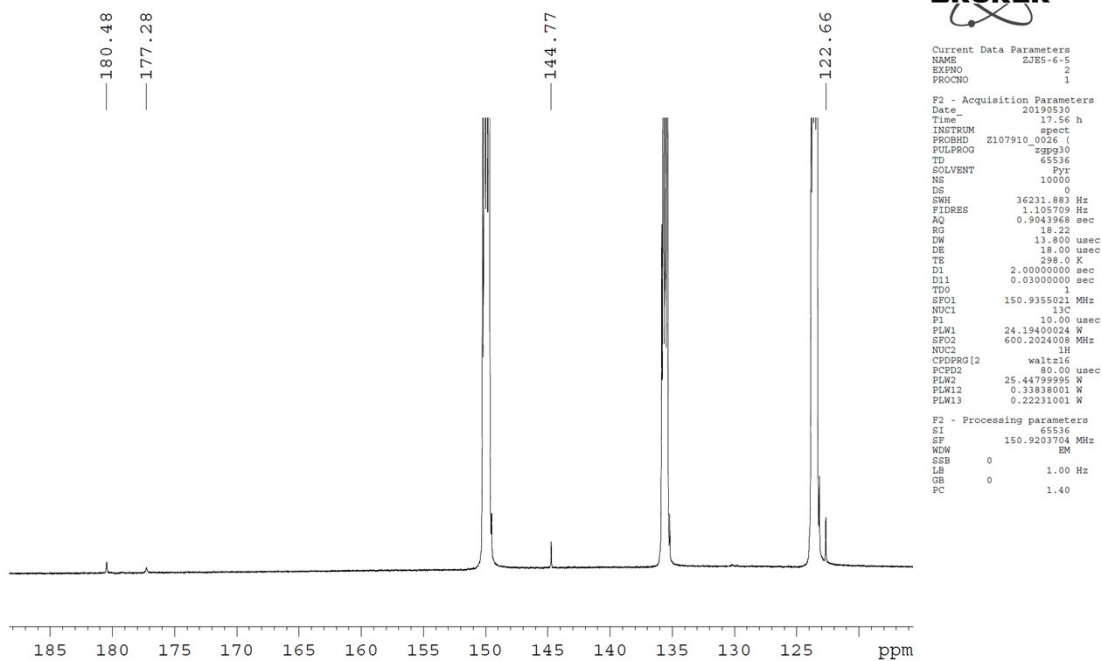

534

535

**Fig. S60.**  $^{13}\text{C}$  NMR (150MHz,  $\text{C}_5\text{D}_5\text{N}$ ) spectrum-2 of compound **18**

536

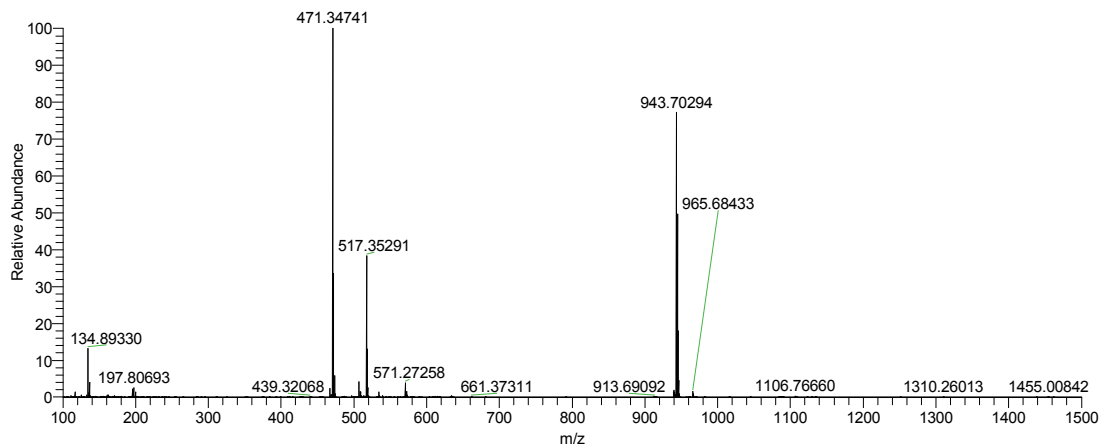

537

538

**Fig. S61.** The ESI-Q-Orbitrap MS spectrum of compound **18**

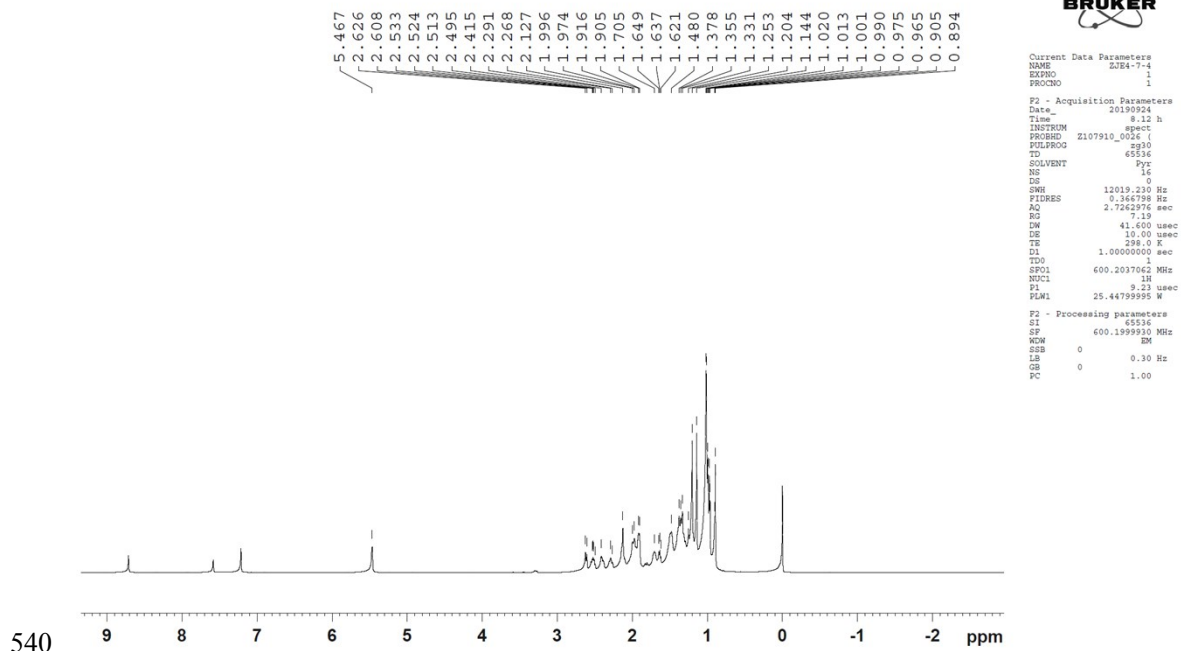

**BRUKER**

```

Current Data Parameters
NAME      ZIR4-7-4
EXPNO    1
PROCNO   1

F2 - Acquisition Parameters
Date_    20190924
Time     8.12 h
INSTRUM  spect
PROBHD   Z107910_0026 (
PULPROG  zg30
TD        65536
SOLVENT  Pyr
NS        16
DS        0
SWH       12019.230 Hz
FIDRES    0.264798 Hz
AQ        2.7262976 sec
RG        7.19
DW        41.600 usec
DE        10.00 usec
TE        298.0 K
TD0       1.00000000 sec
SFO1      600.2037062 MHz
NUC1      1H
P1         9.23 usec
PLW1      25.4479995 W

F2 - Processing parameters
SI         65536
SF         600.1999910 MHz
WDW        EM
SSB        0
LB         0.30 Hz
GB         0
PC         1.00
  
```

540  
541  
542

Fig. S62. <sup>1</sup>H NMR (600MHz, C<sub>5</sub>D<sub>5</sub>N) spectrum of compound 19

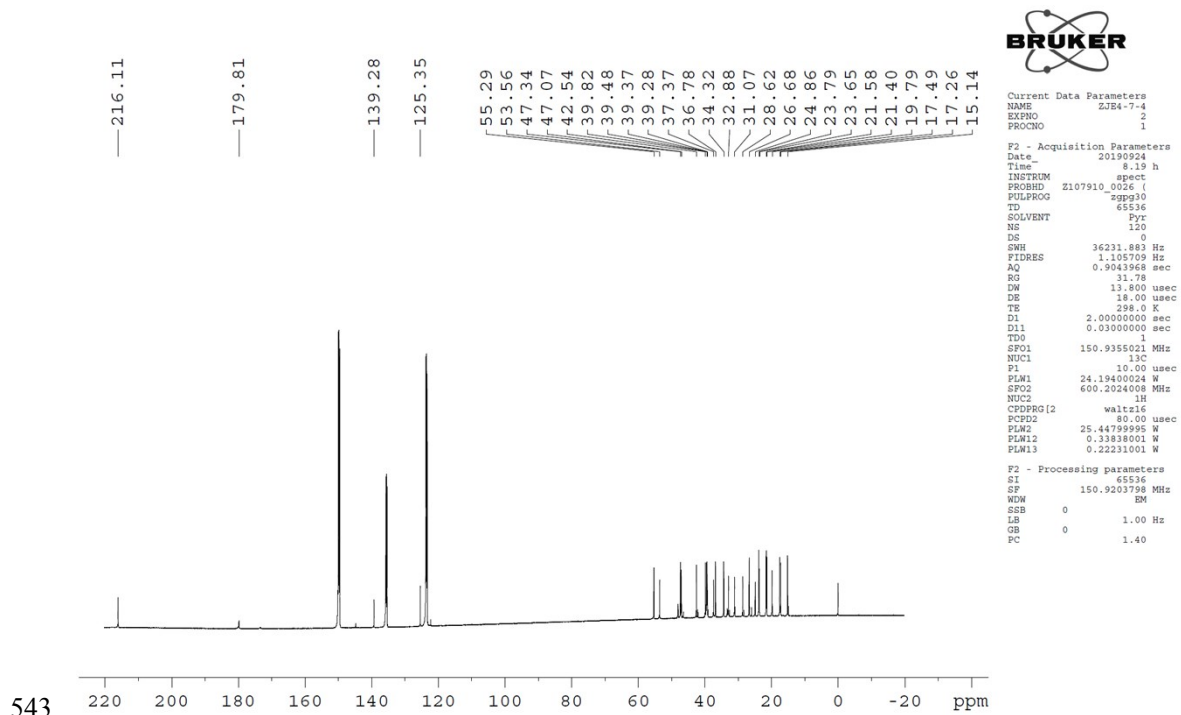

**BRUKER**

```

Current Data Parameters
NAME      ZIR4-7-4
EXPNO    2
PROCNO   1

F2 - Acquisition Parameters
Date_    20190924
Time     8.19 h
INSTRUM  spect
PROBHD   Z107910_0026 (
PULPROG  zgpg30
TD        65536
SOLVENT  Pyr
NS        120
DS        0
SWH       36231.883 Hz
FIDRES    1.105709 Hz
AQ        0.3043968 sec
RG        31.78
DW        13.800 usec
DE        18.00 usec
TE        298.0 K
D1        2.00000000 sec
D11       0.03000000 sec
TD0       1
SFO1      150.9355021 MHz
NUC1      13C
P1        10.00 usec
PLW1      24.19400024 W
SFO2      600.2024008 MHz
NUC2      1H
CPDPRG2  waltz16
PCPD2     80.00 usec
PLW2     25.4479995 W
PLW12    0.33838001 W
PLW13    0.22231001 W

F2 - Processing parameters
SI         65536
SF         150.9203798 MHz
WDW        EM
SSB        0
LB         1.00 Hz
GB         0
PC         1.40
  
```

543  
544  
545

Fig. S63. <sup>13</sup>C NMR (150MHz, C<sub>5</sub>D<sub>5</sub>N) spectrum of compound 19

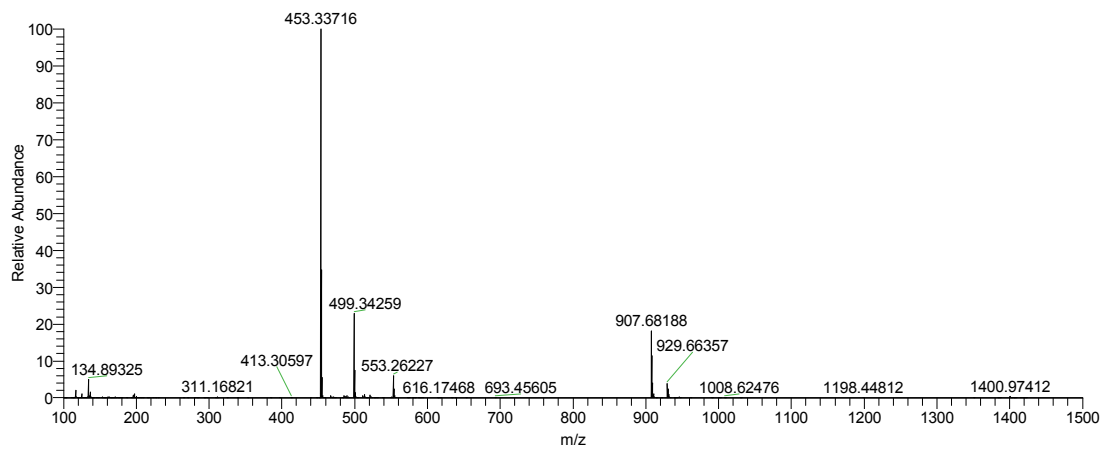

546  
547  
548

**Fig. S64.** The ESI-Q-Orbitrap MS spectrum of compound **19**

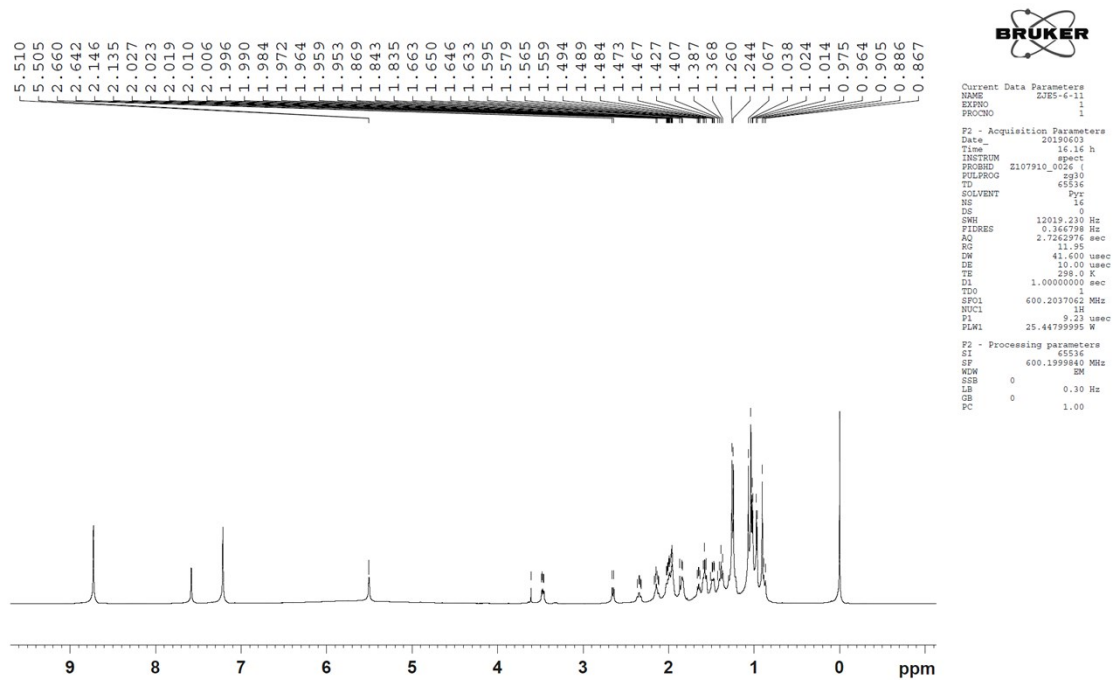

550  
551  
552

Fig. S65.  $^1\text{H}$  NMR (600MHz,  $\text{C}_5\text{D}_5\text{N}$ ) spectrum of compound **20**

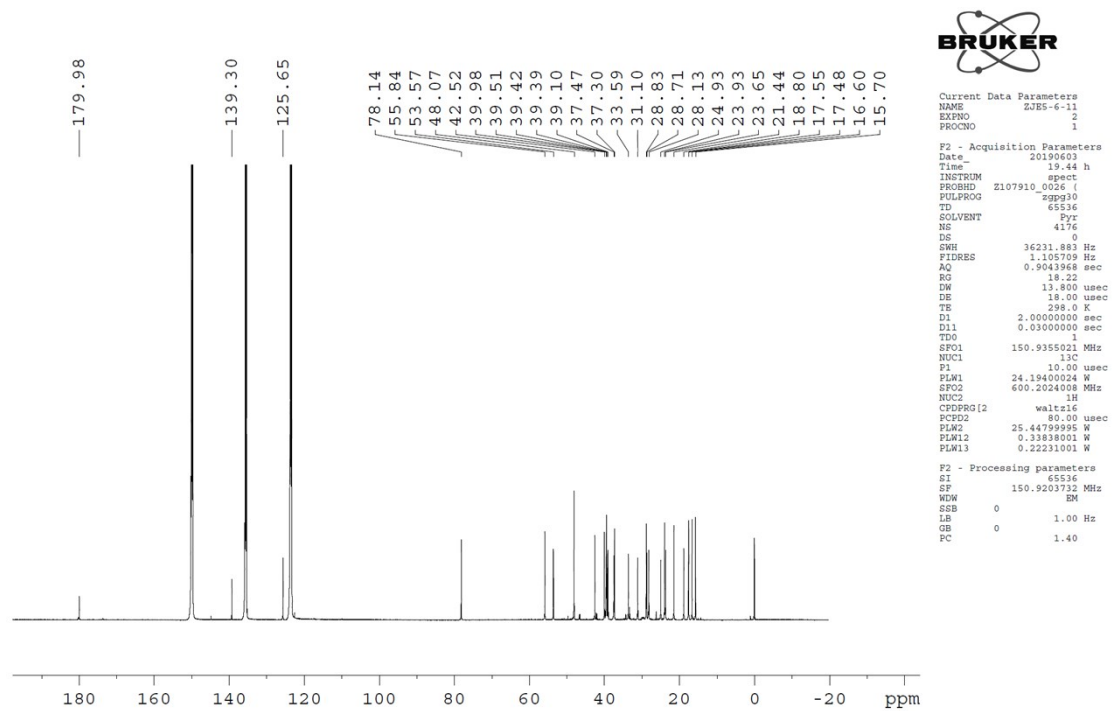

553  
554  
555

Fig. S66.  $^{13}\text{C}$  NMR (150MHz,  $\text{C}_5\text{D}_5\text{N}$ ) spectrum of compound **20**



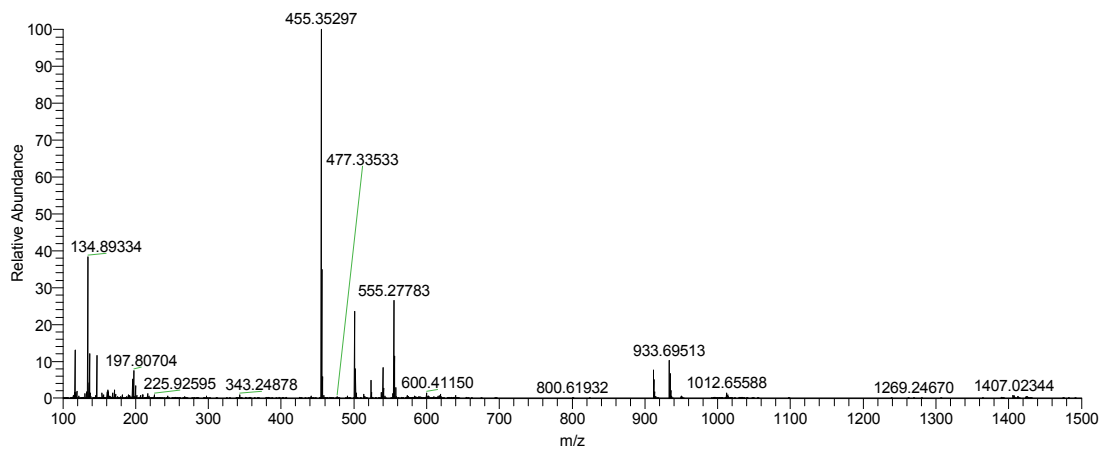

556  
557  
558

**Fig. S67.** The ESI-Q-Orbitrap MS spectrum of compound **20**

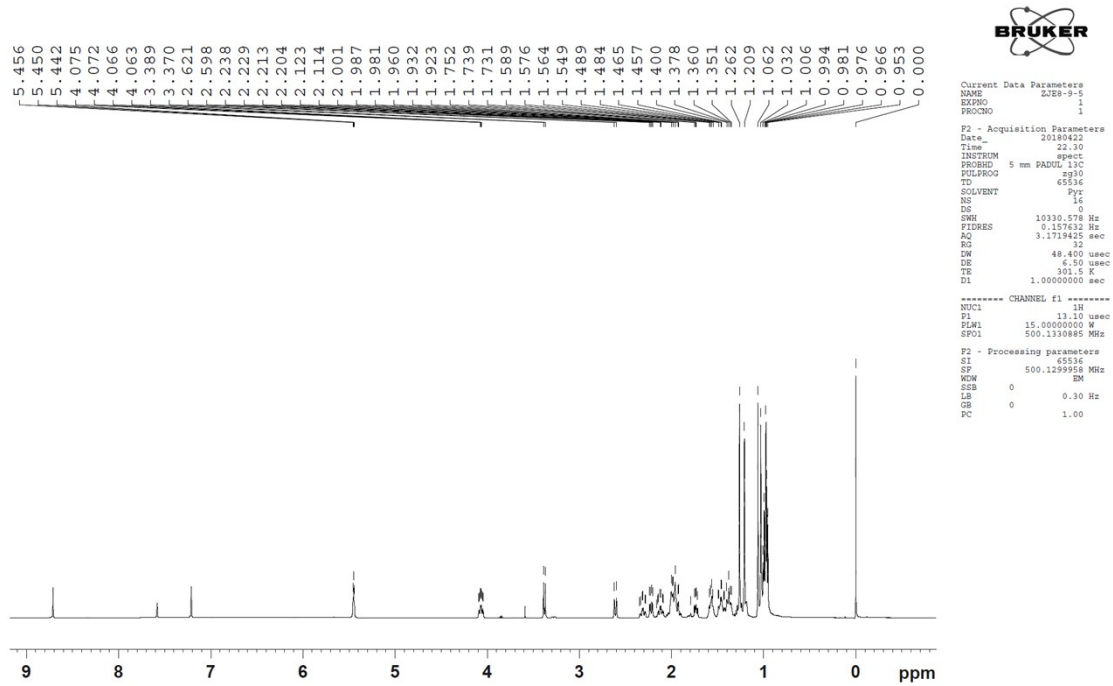

560  
561  
562

Fig. S68. <sup>1</sup>H NMR (500MHz, C<sub>5</sub>D<sub>5</sub>N) spectrum of compound 21

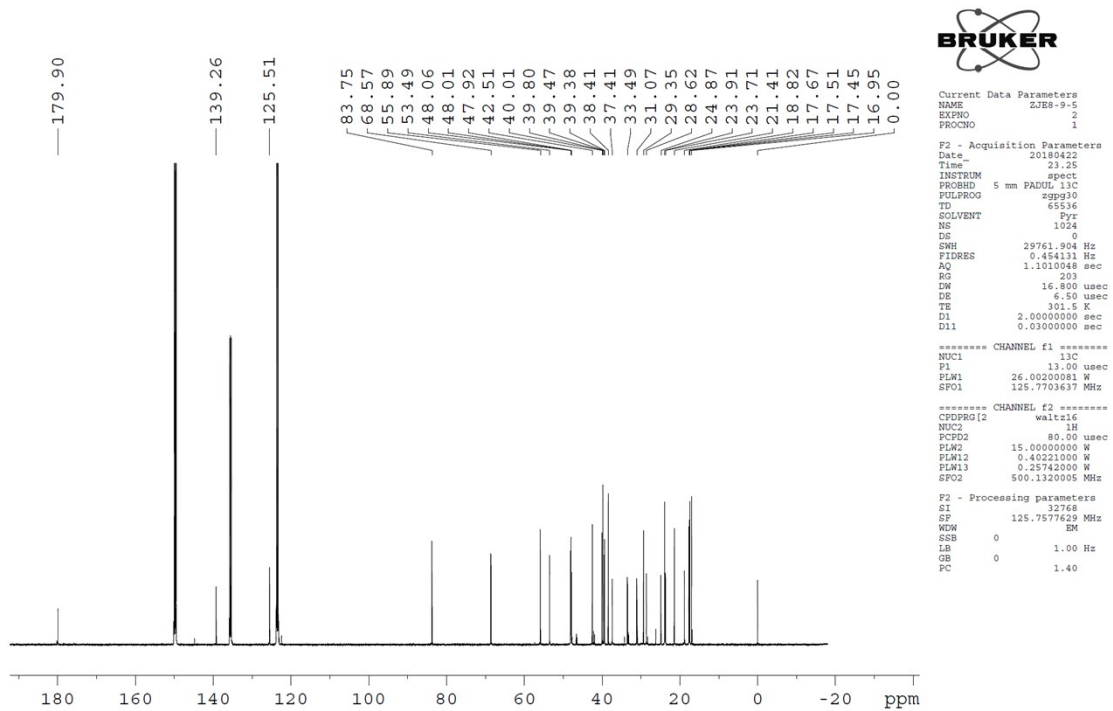

563  
564  
565

Fig. S69. <sup>13</sup>C NMR (125MHz, C<sub>5</sub>D<sub>5</sub>N) spectrum of compound 21

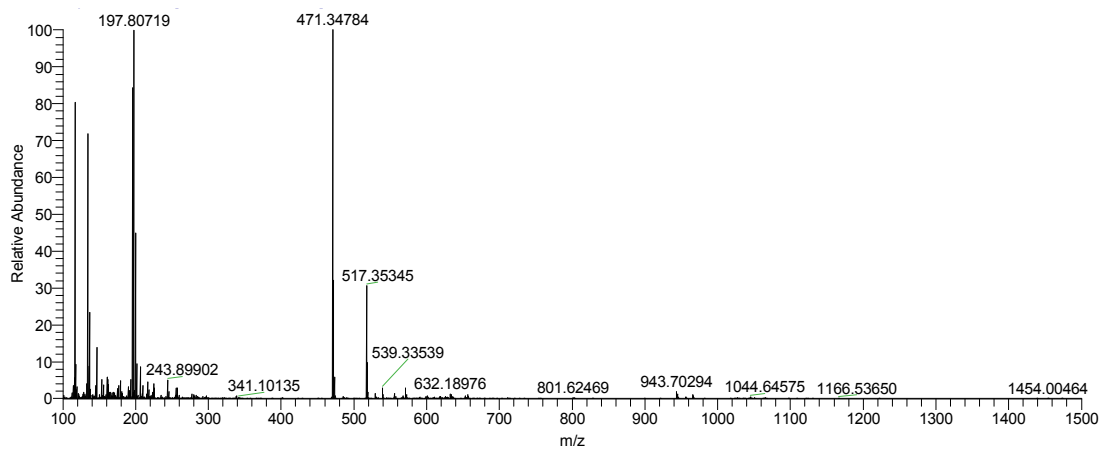

566  
567  
568

**Fig. S70.** The ESI-Q-Orbitrap MS spectrum of compound **21**

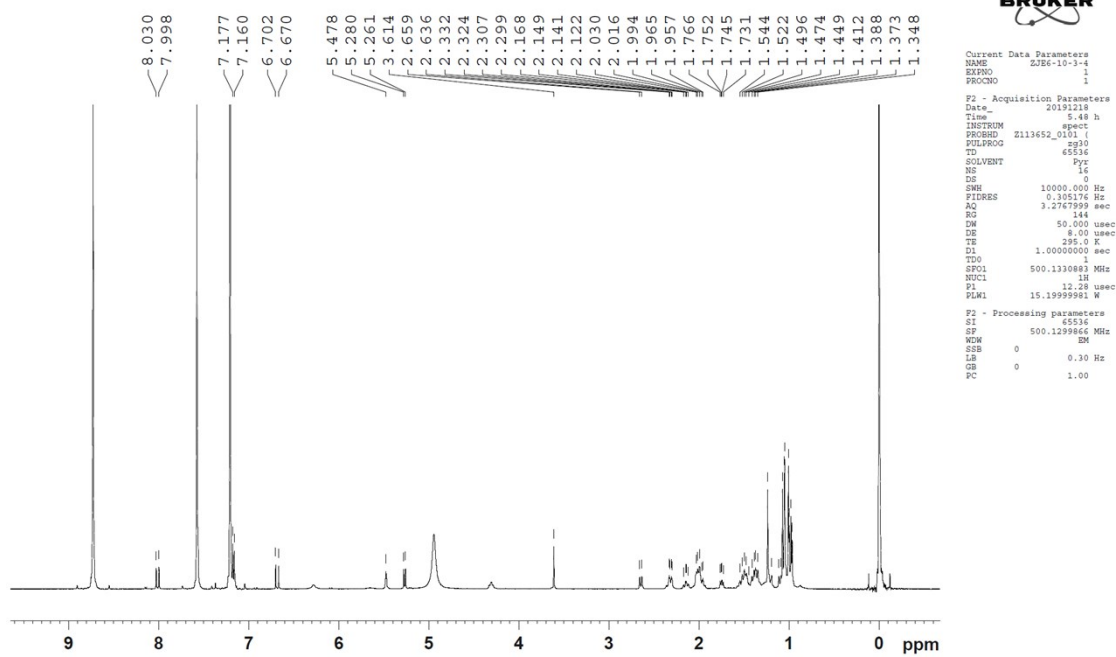

570  
571  
572

Fig. S71. <sup>1</sup>H NMR (500MHz, C<sub>5</sub>D<sub>5</sub>N) spectrum of compound 22

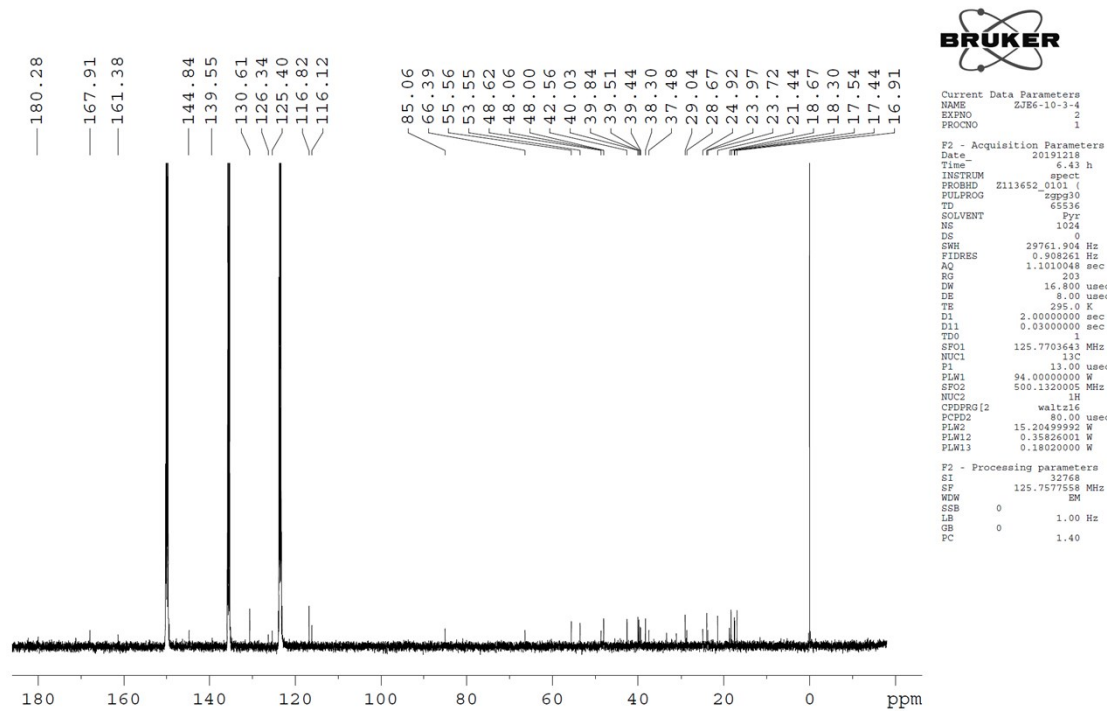

573  
574  
575

Fig. S72. <sup>13</sup>C NMR (125MHz, C<sub>5</sub>D<sub>5</sub>N) spectrum of compound 22

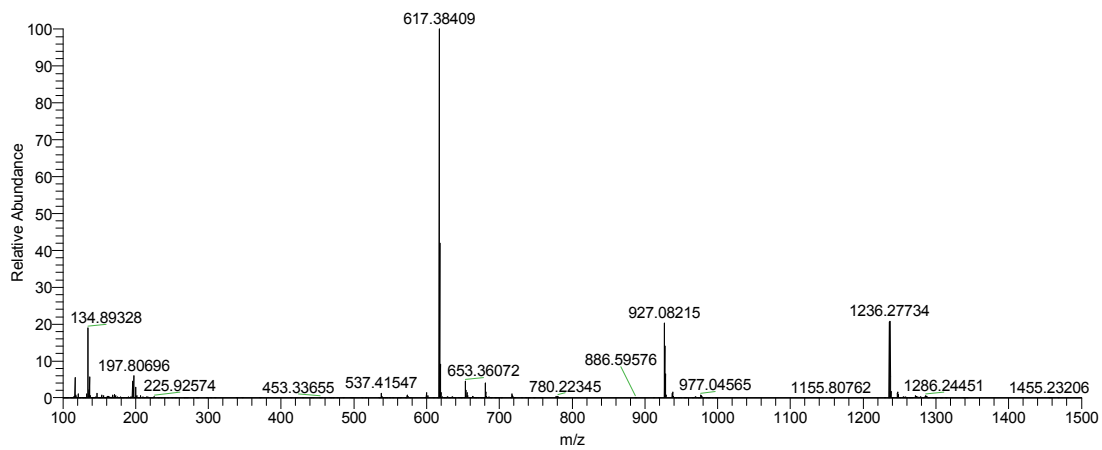

576

577

**Fig. S73.** The ESI-Q-Orbitrap MS spectrum of compound **22**

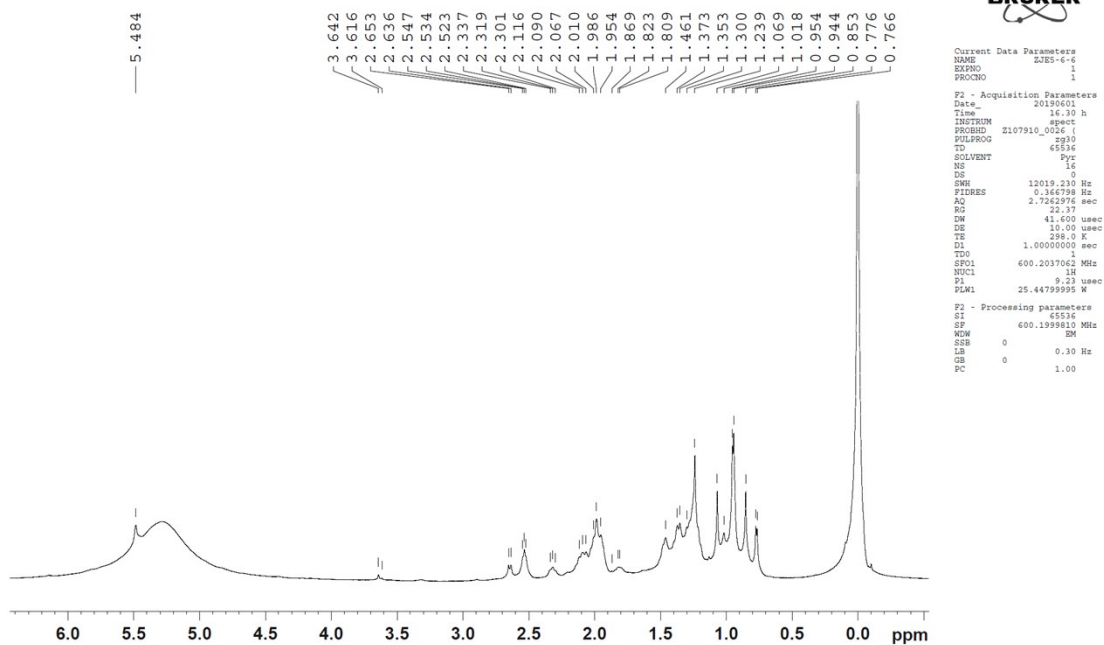

Fig. S74.  $^1\text{H}$  NMR (600MHz,  $\text{C}_5\text{D}_5\text{N}$ ) spectrum of compound 23

580

581

582

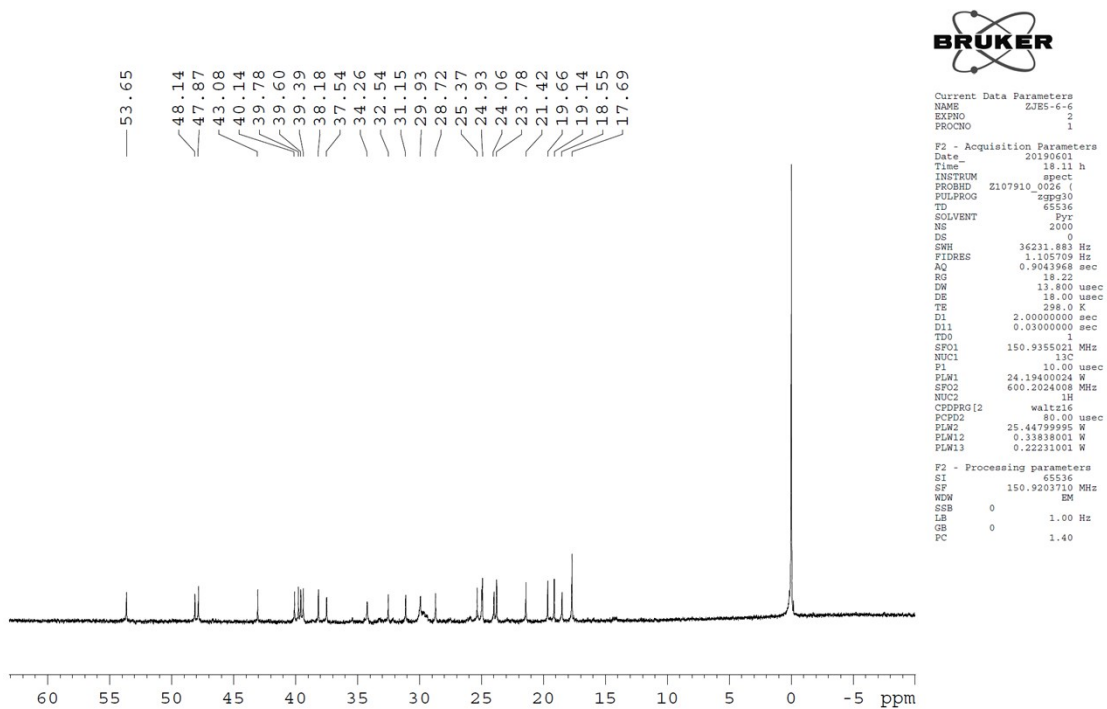

Fig. S75.  $^{13}\text{C}$  NMR (150MHz,  $\text{C}_5\text{D}_5\text{N}$ ) spectrum-1 of compound 23

583

584

585

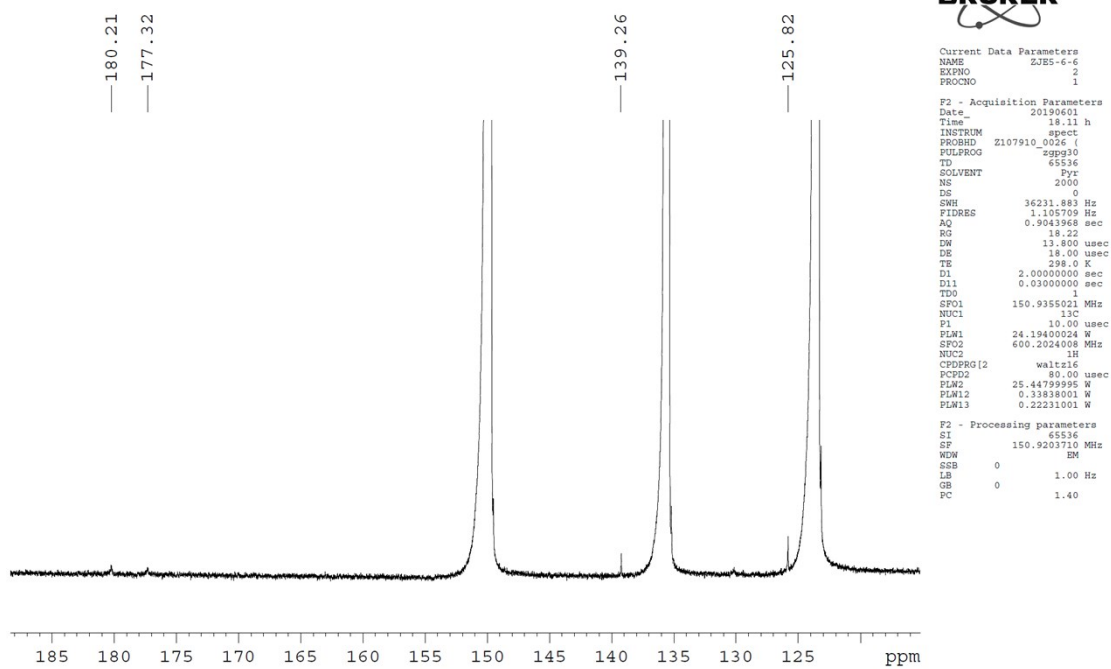

586

587

588

Fig. S76.  $^{13}\text{C}$  NMR (150MHz,  $\text{C}_5\text{D}_5\text{N}$ ) spectrum-2 of compound 23

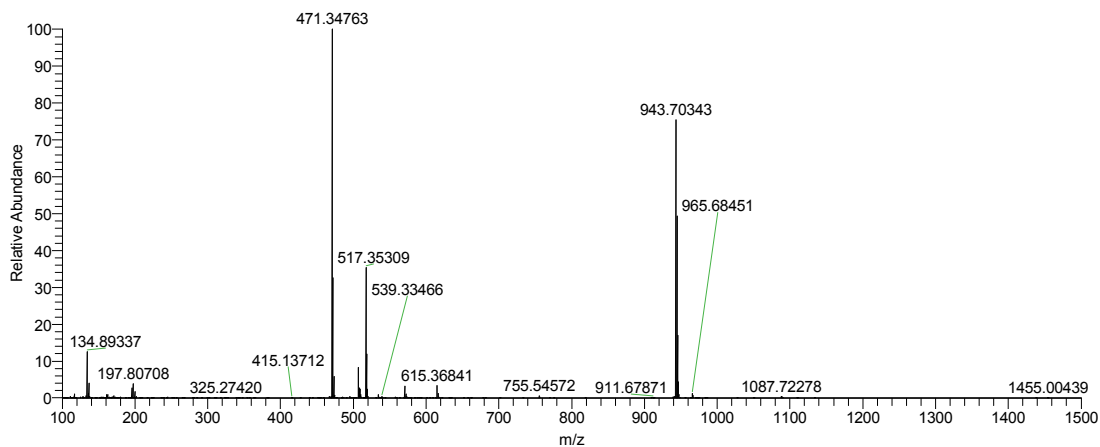

589

590

Fig. S77. The ESI-Q-Orbitrap MS spectrum of compound 23

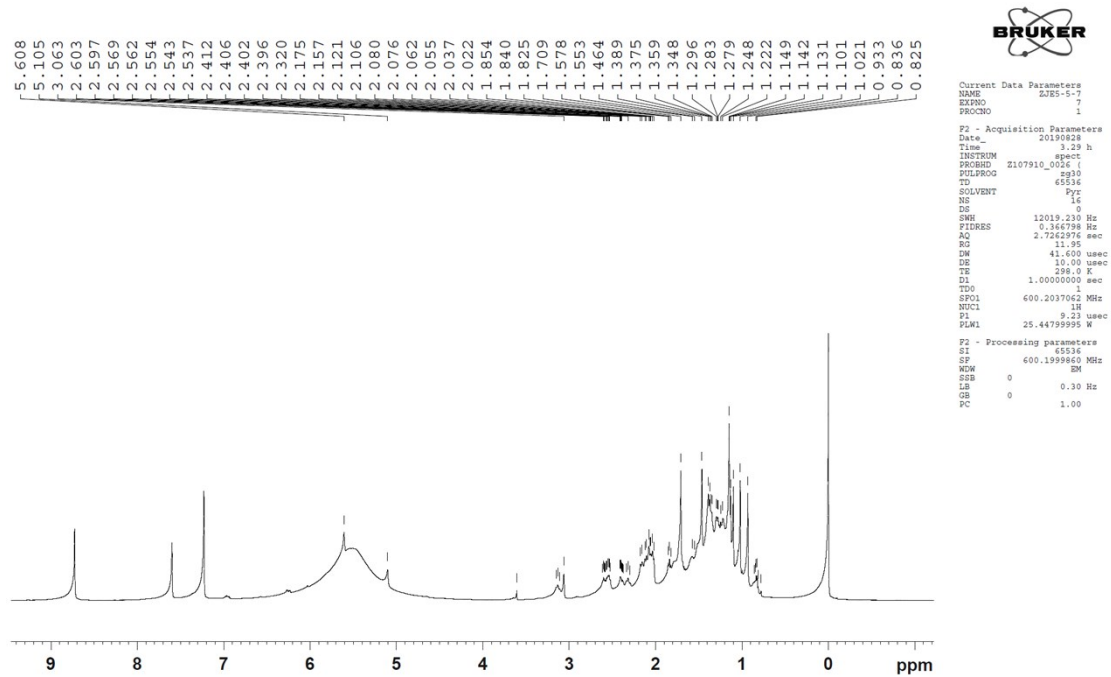

Fig. S78. <sup>1</sup>H NMR (600MHz, C<sub>5</sub>D<sub>5</sub>N) spectrum of compound 24

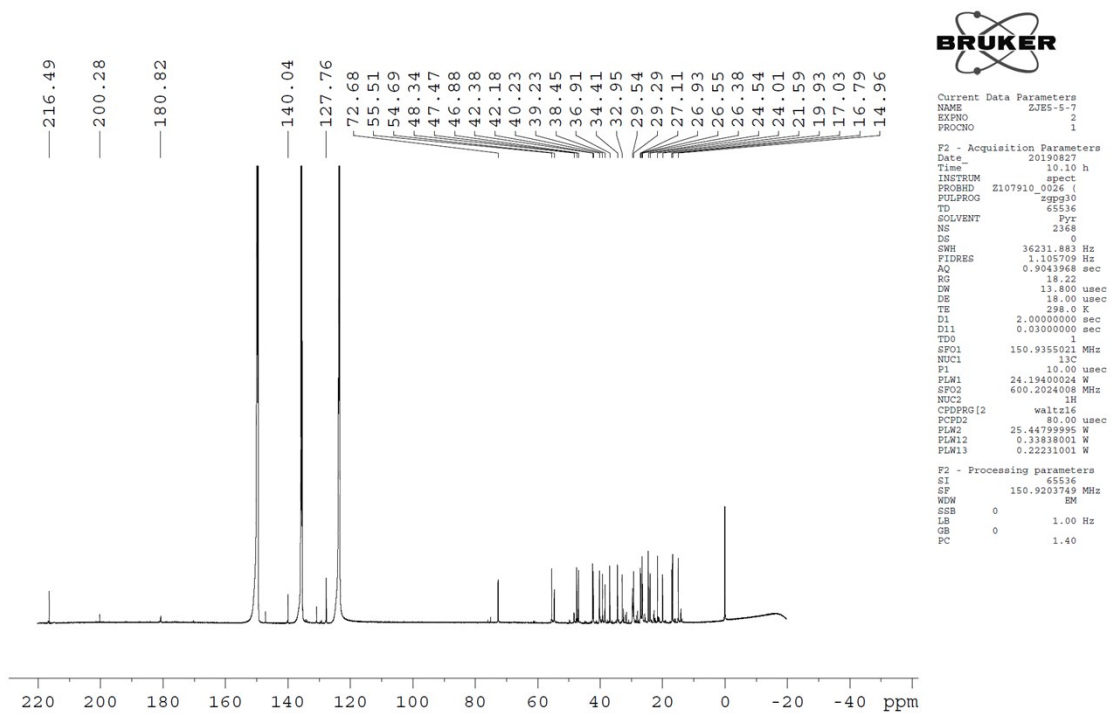

Fig. S79. <sup>13</sup>C NMR (150MHz, C<sub>5</sub>D<sub>5</sub>N) spectrum of compound 24



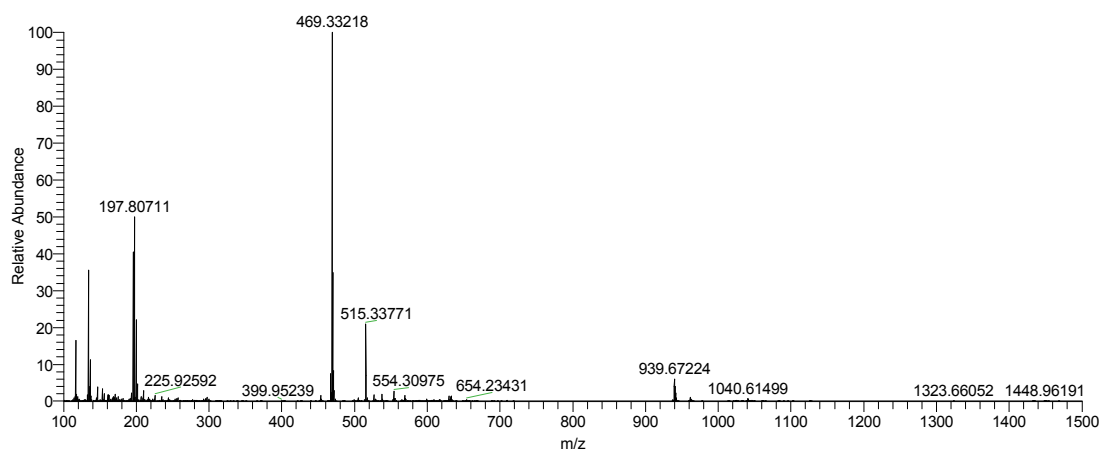

598

599

**Fig. S80.** The ESI-Q-Orbitrap MS spectrum of compound **24**

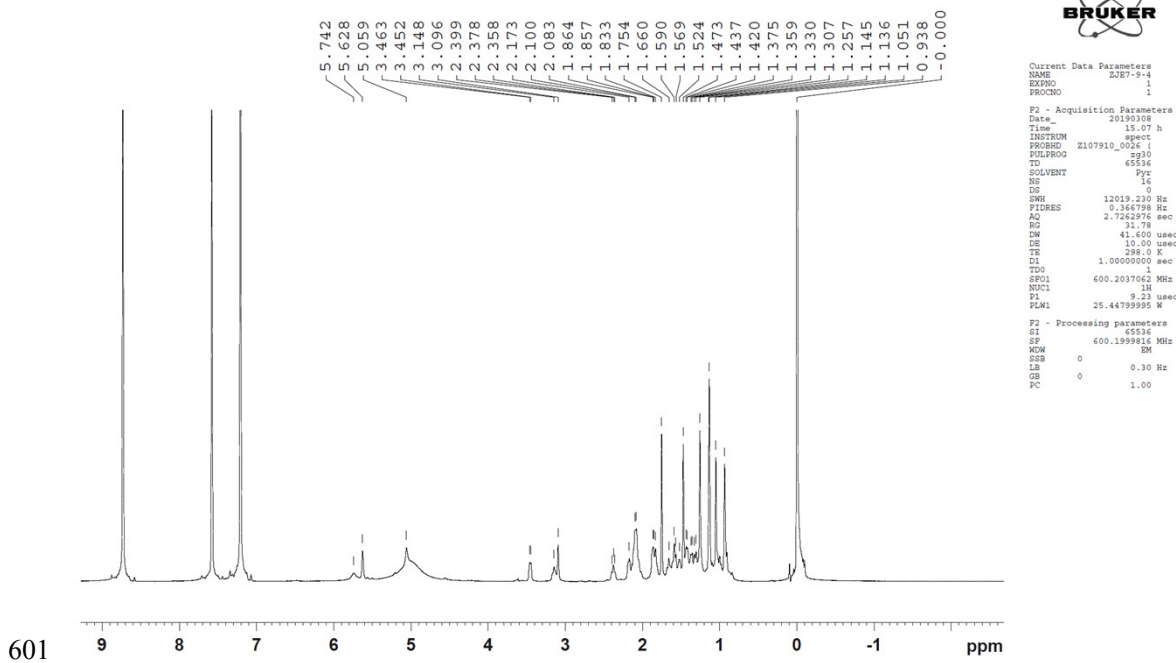

601  
602  
603

Fig. S81. <sup>1</sup>H NMR (600MHz, C<sub>5</sub>D<sub>5</sub>N) spectrum of compound 25

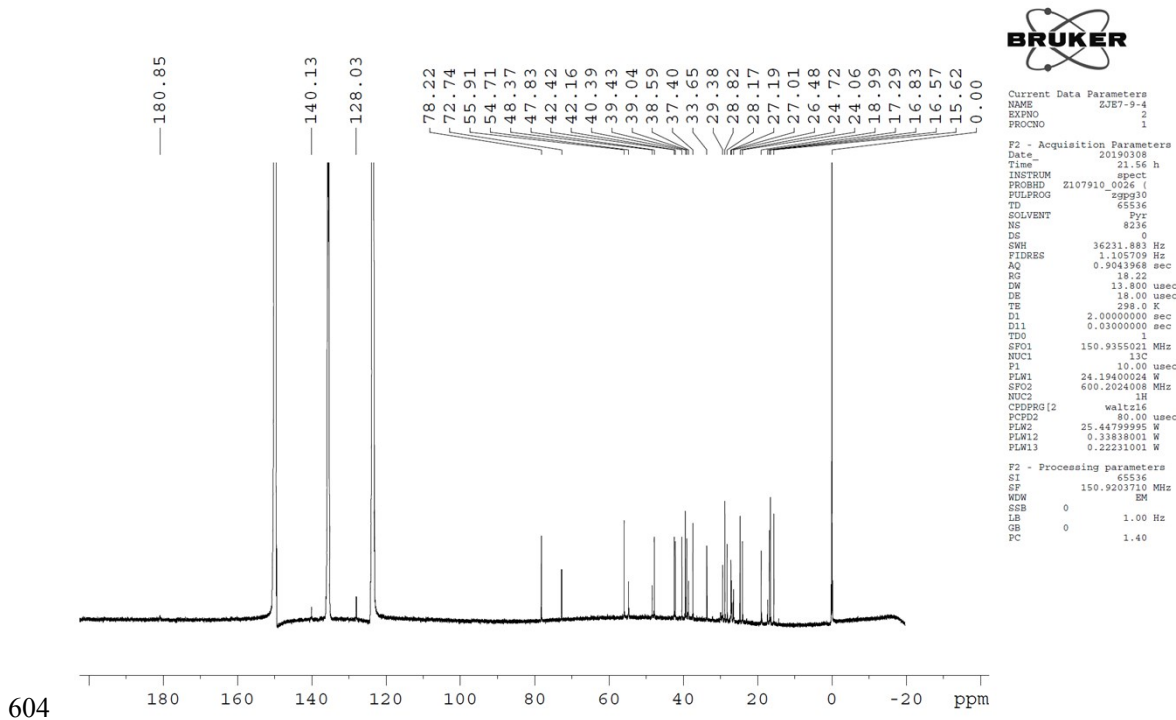

604  
605  
606

Fig. S82. <sup>13</sup>C NMR (150MHz, C<sub>5</sub>D<sub>5</sub>N) spectrum of compound 25

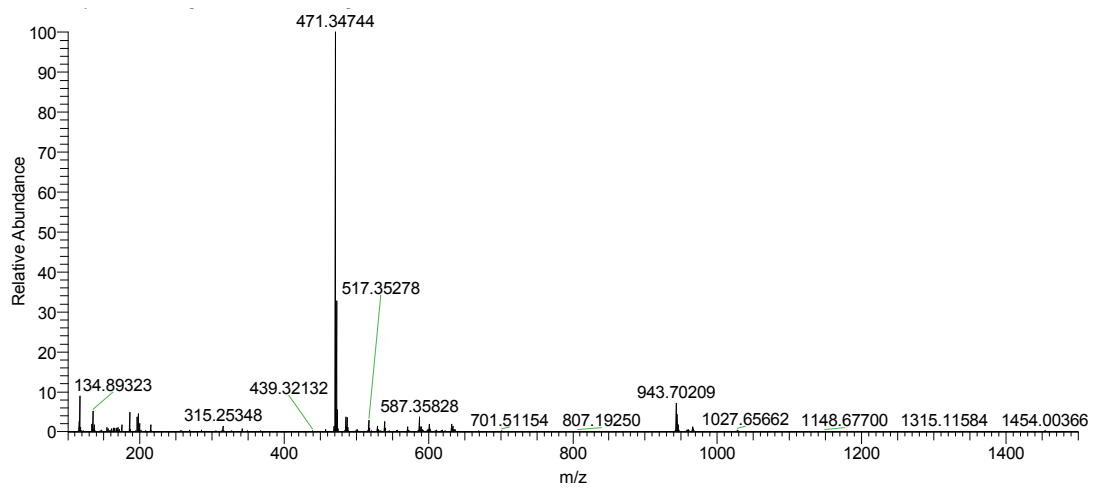

607  
608

**Fig. S83.** The ESI-Q-Orbitrap MS spectrum of compound **25**

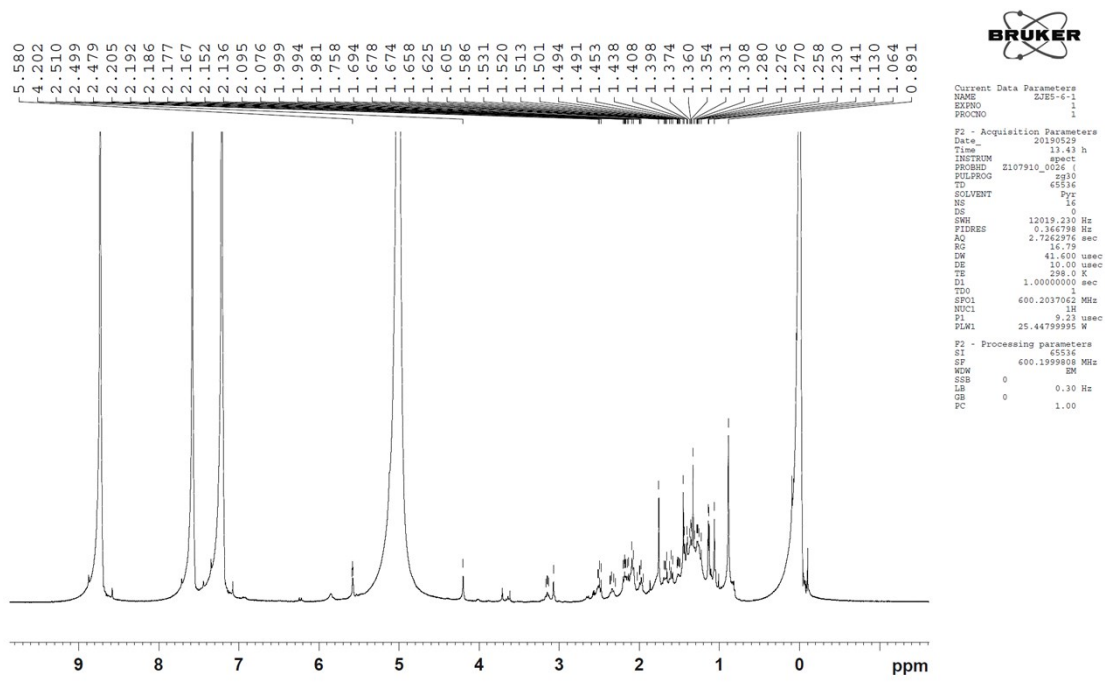

610  
611  
612

Fig. S84. <sup>1</sup>H NMR (600MHz, C<sub>5</sub>D<sub>5</sub>N) spectrum of compound 26

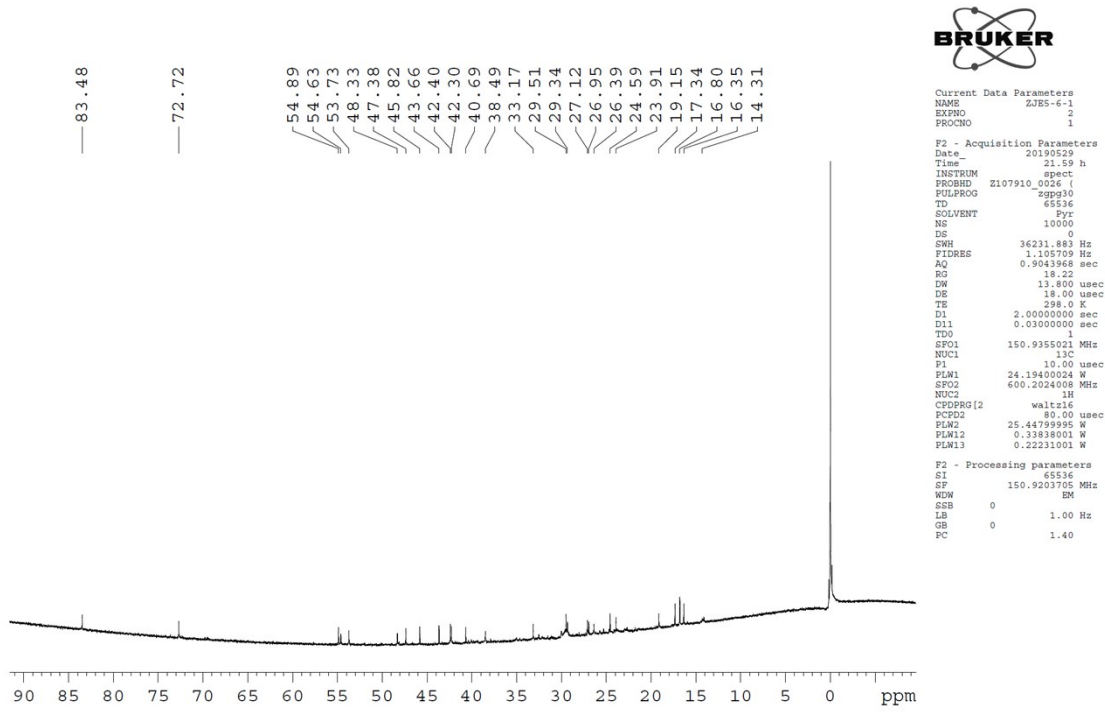

613  
614  
615

Fig. S85. <sup>13</sup>C NMR (150MHz, C<sub>5</sub>D<sub>5</sub>N) spectrum-1 of compound 26

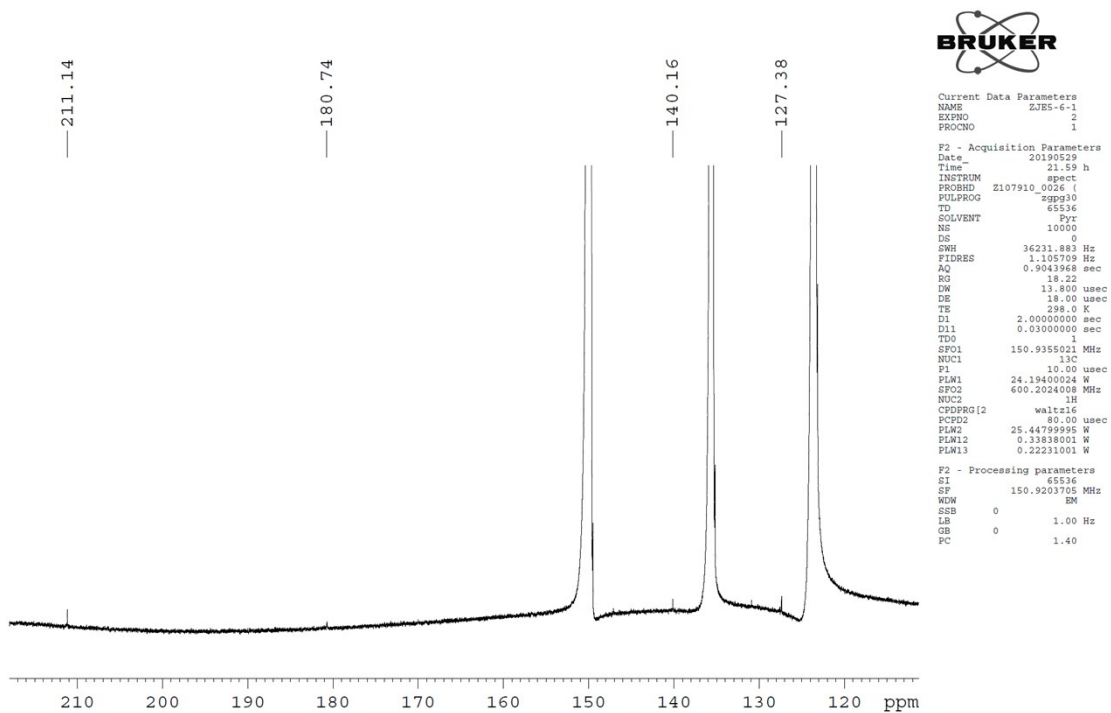

616

617

618

**Fig. S86.**  $^{13}\text{C}$  NMR (150MHz,  $\text{C}_5\text{D}_5\text{N}$ ) spectrum-2 of compound **26**

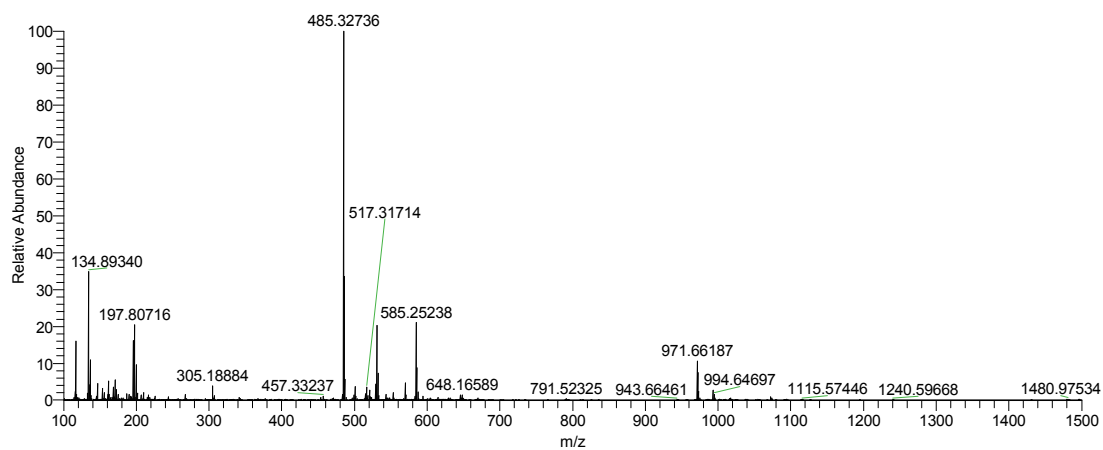

619

620

621

**Fig. S87.** The ESI-Q-Orbitrap MS spectrum of compound **26**

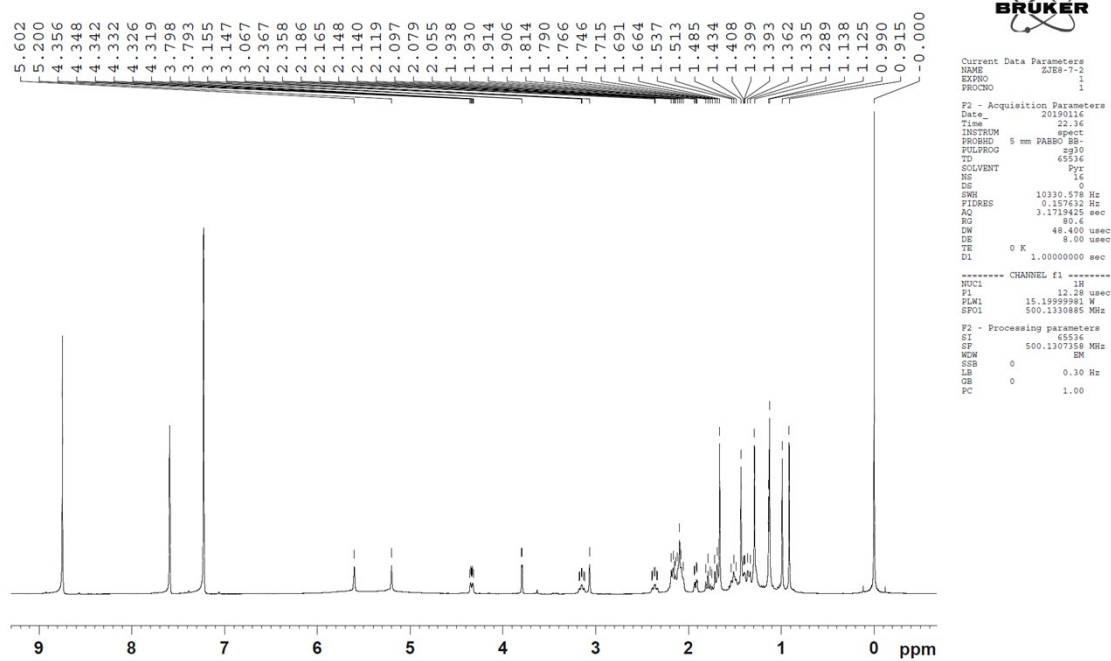

623  
624  
625

Fig. S88.  $^1\text{H}$  NMR (500MHz,  $\text{C}_5\text{D}_5\text{N}$ ) spectrum of compound 27

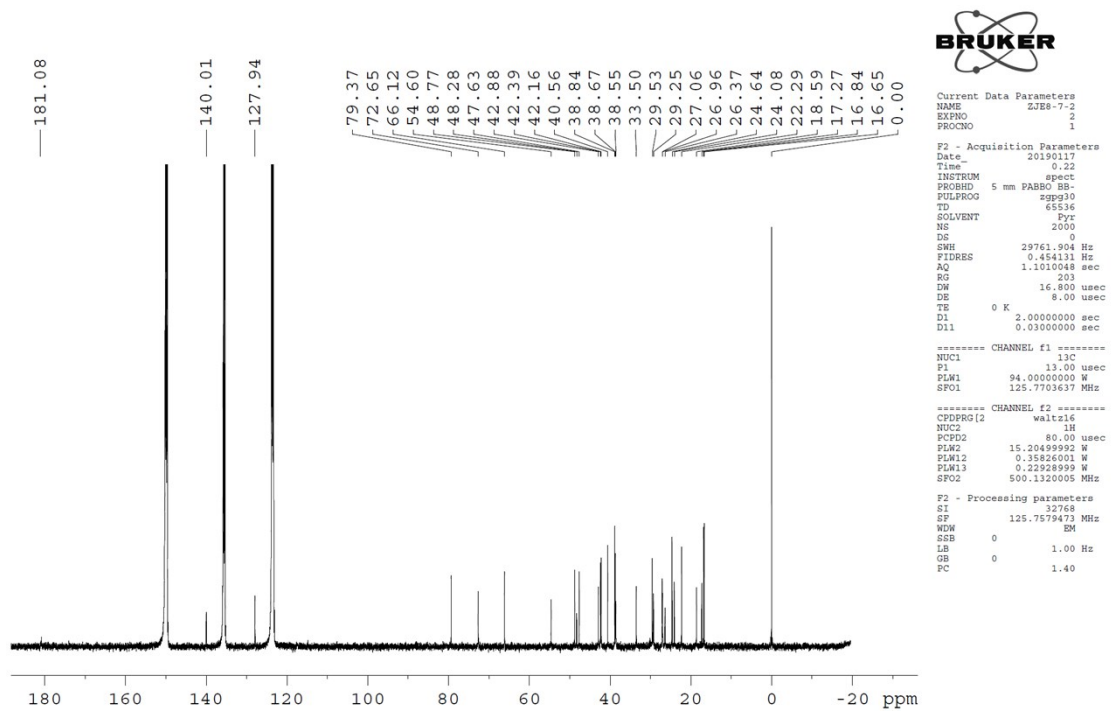

626  
627  
628

Fig. S89.  $^{13}\text{C}$  NMR (125MHz,  $\text{C}_5\text{D}_5\text{N}$ ) spectrum of compound 27

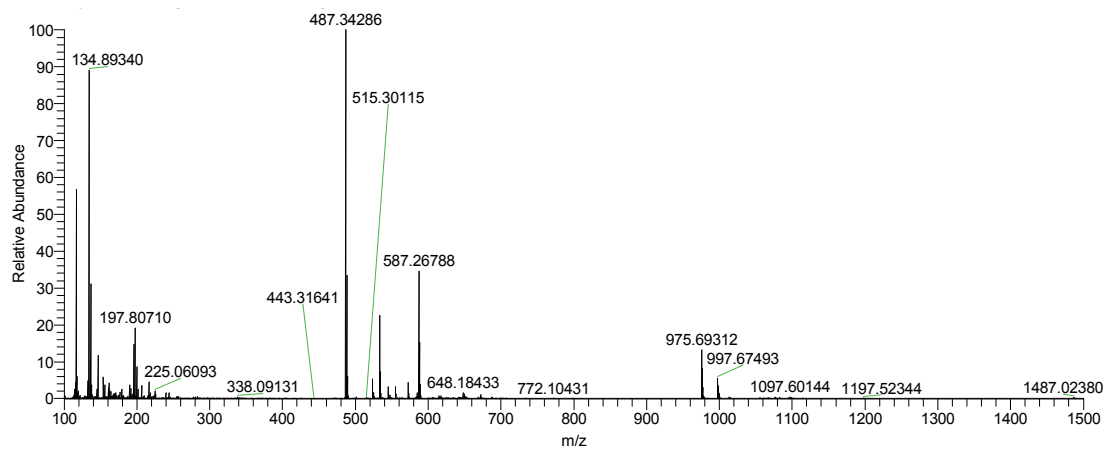

629  
630  
631

**Fig. S90.** The ESI-Q-Orbitrap MS spectrum of compound **27**

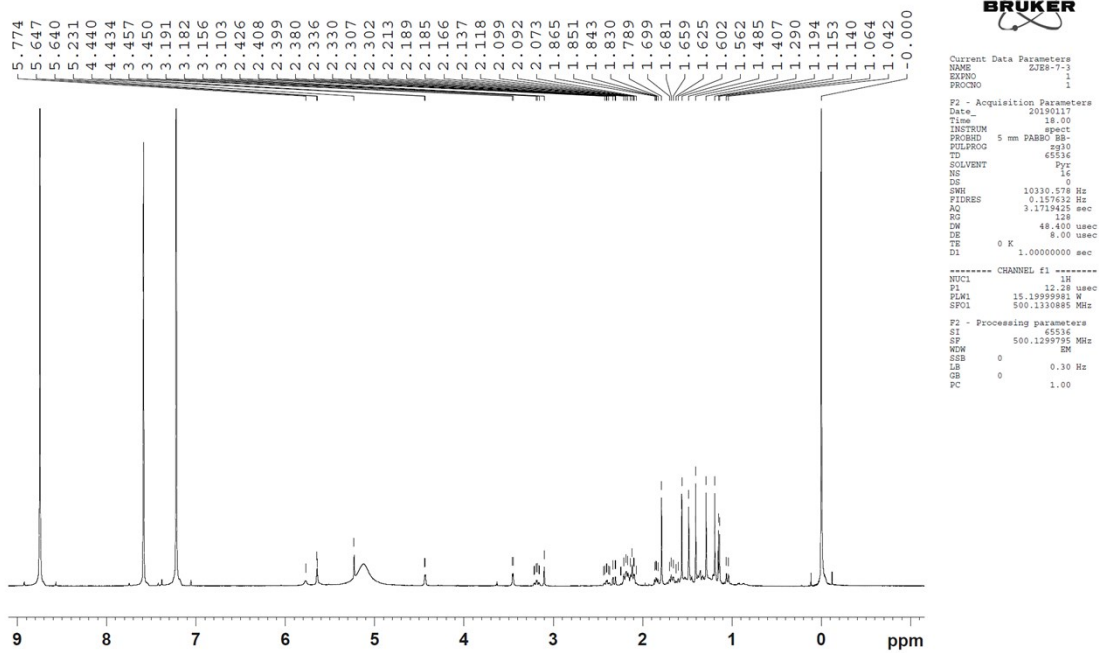

633  
 634  
 635

Fig. S91. <sup>1</sup>H NMR (500MHz, C<sub>5</sub>D<sub>5</sub>N) spectrum of compound 28

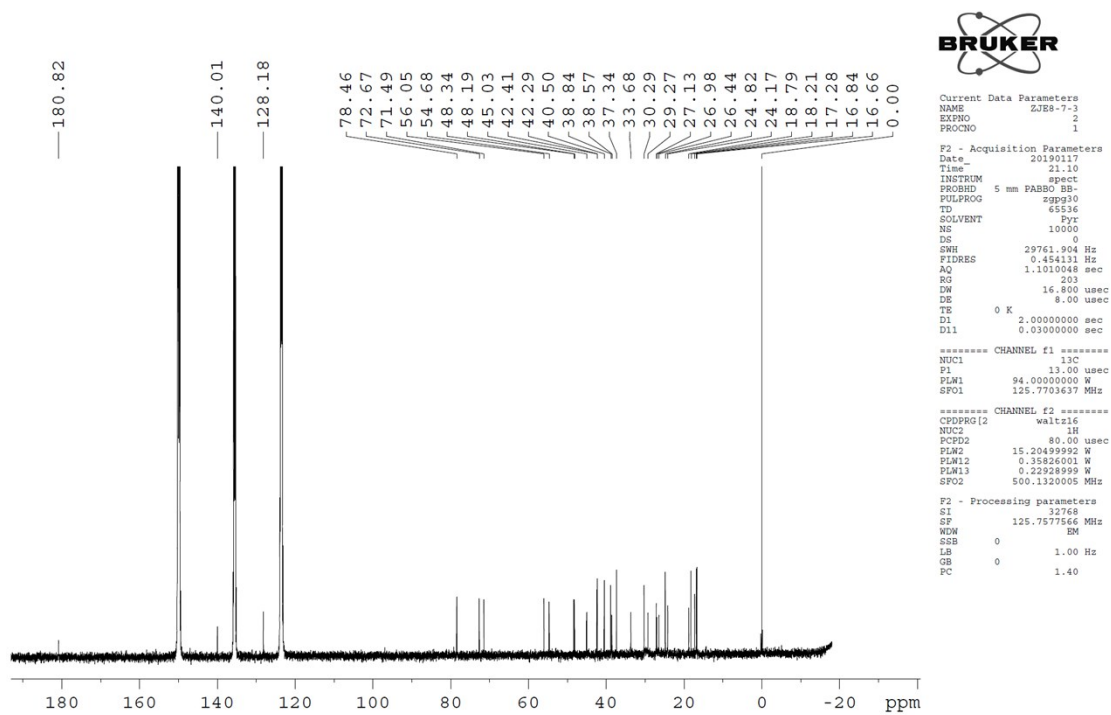

636  
 637  
 638

Fig. S92. <sup>13</sup>C NMR (125MHz, C<sub>5</sub>D<sub>5</sub>N) spectrum of compound 28



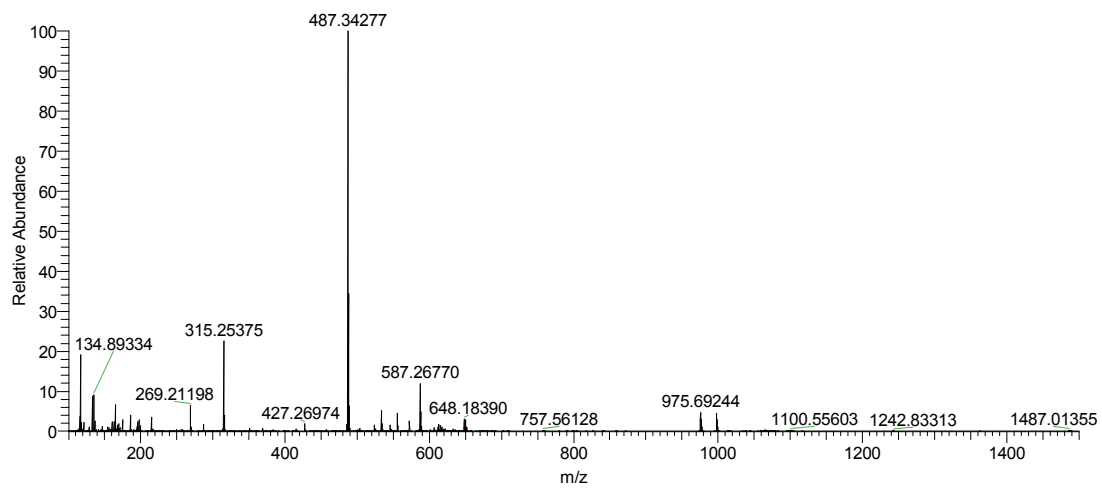

639  
640  
641

**Fig. S93.** The ESI-Q-Orbitrap MS spectrum of compound **28**

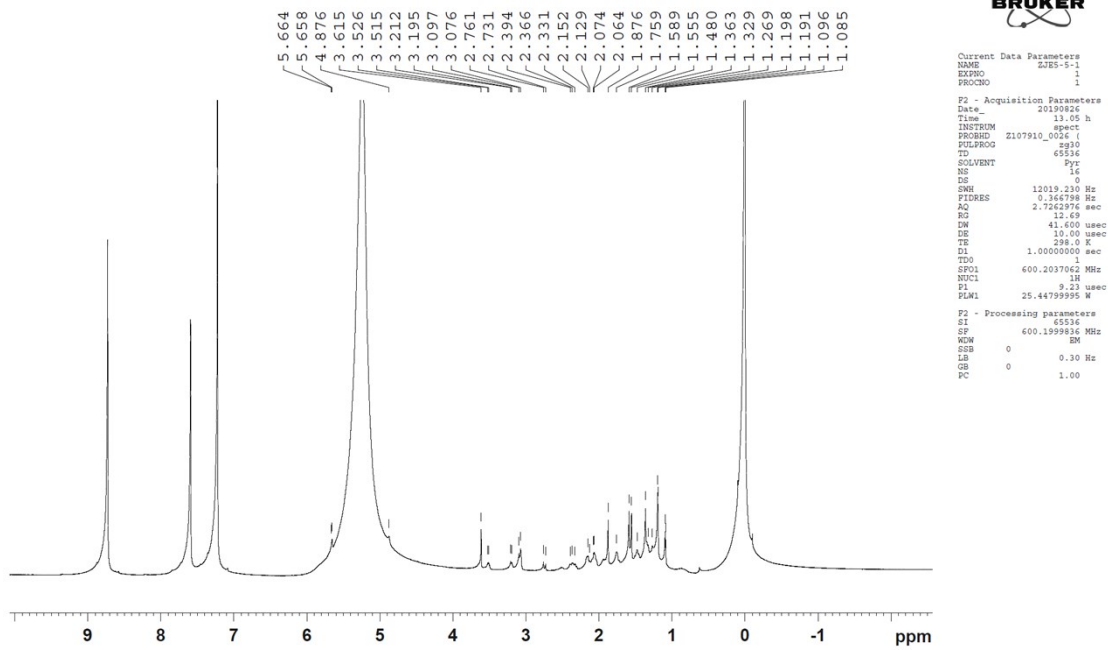

643  
644  
645

Fig. S94. <sup>1</sup>H NMR (600MHz, C<sub>5</sub>D<sub>5</sub>N) spectrum of compound 29

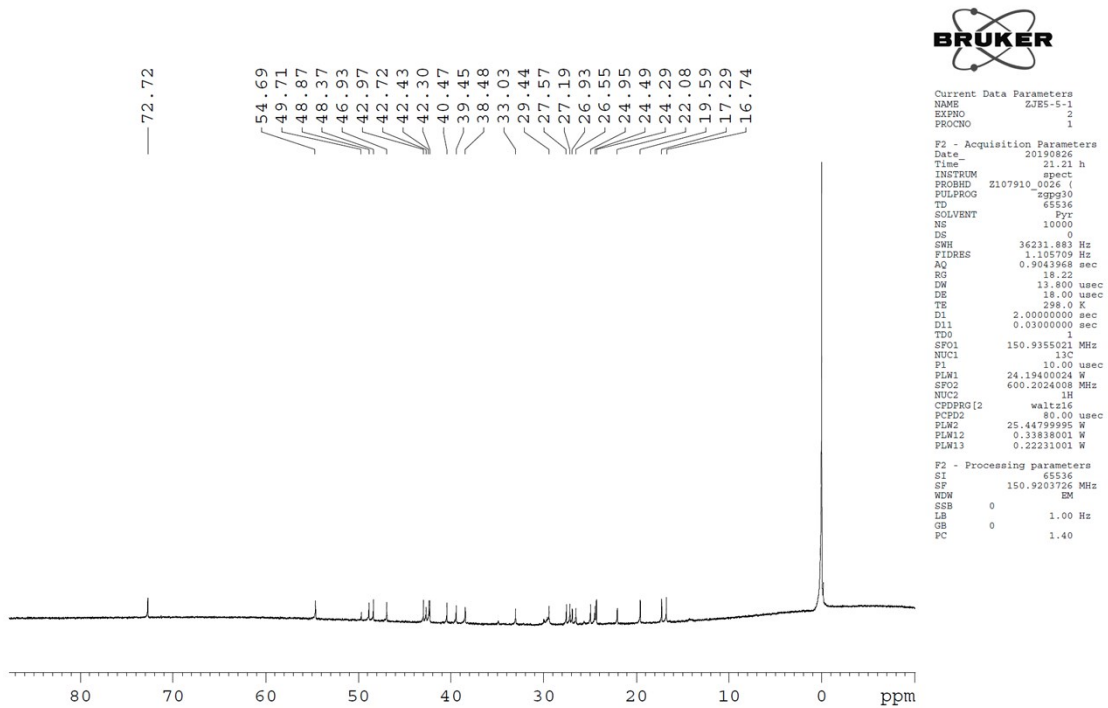

646  
647  
648

Fig. S95. <sup>13</sup>C NMR (150MHz, C<sub>5</sub>D<sub>5</sub>N) spectrum-1 of compound 29

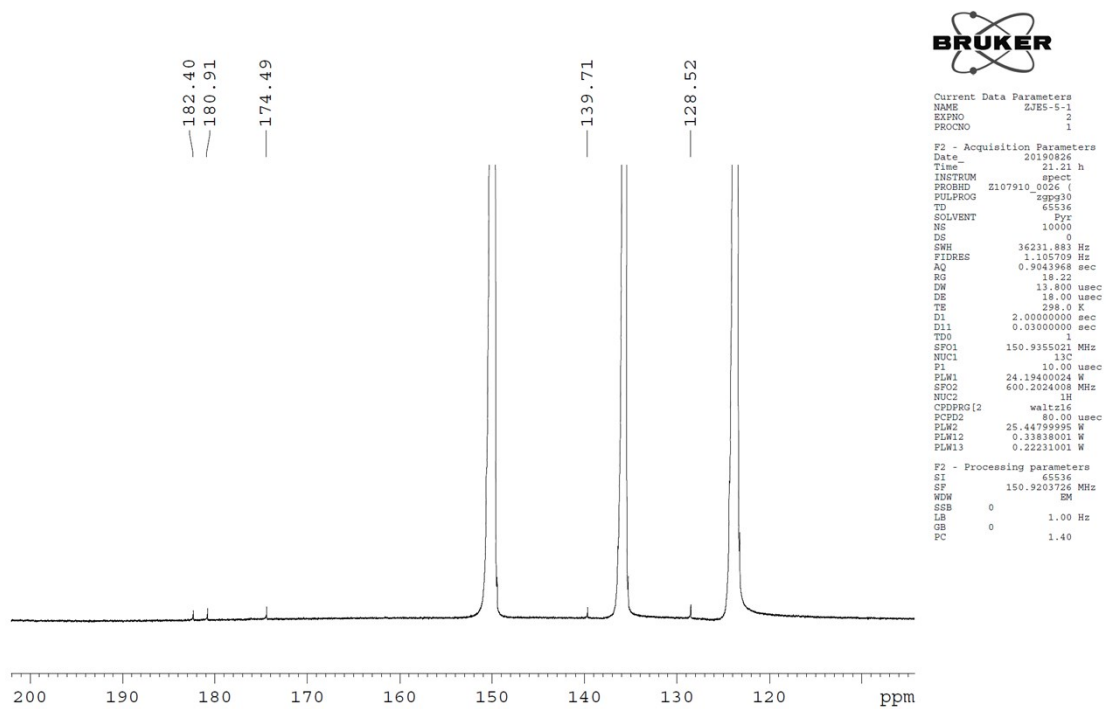

649  
650  
651

Fig. S96.  $^{13}\text{C}$  NMR (150MHz,  $\text{C}_5\text{D}_5\text{N}$ ) spectrum-2 of compound **29**

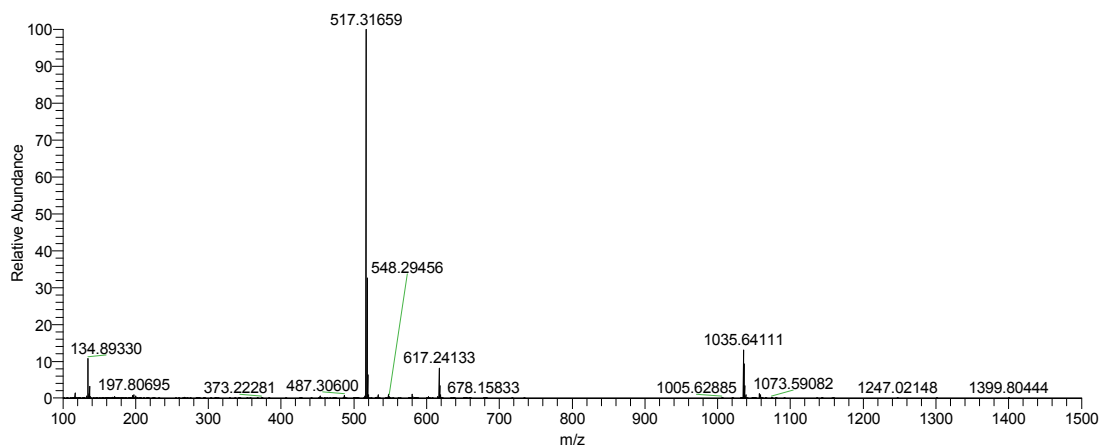

652  
653

Fig. S97. The ESI-Q-Orbitrap MS spectrum of compound **29**

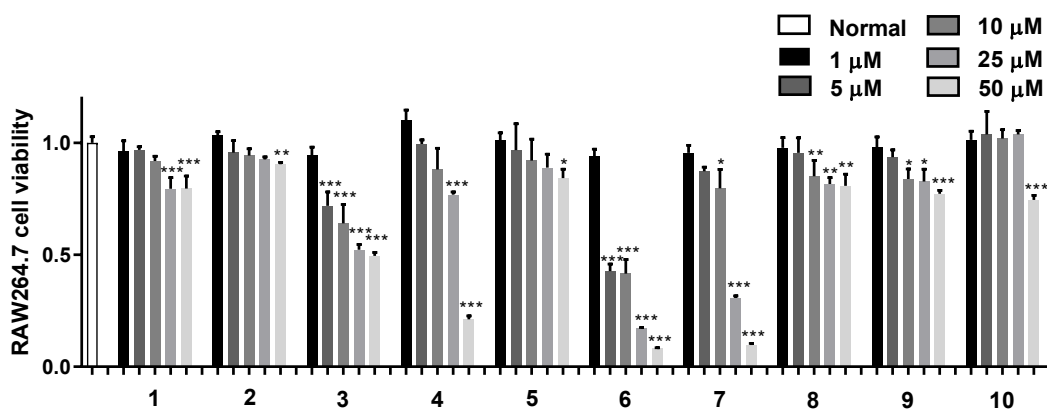

655

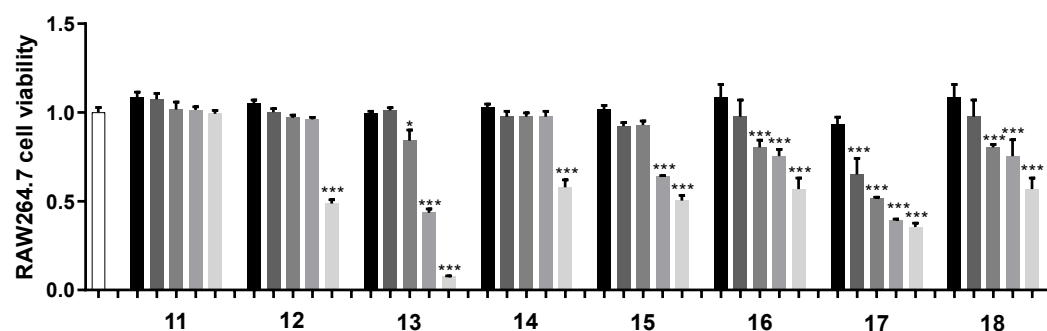

656

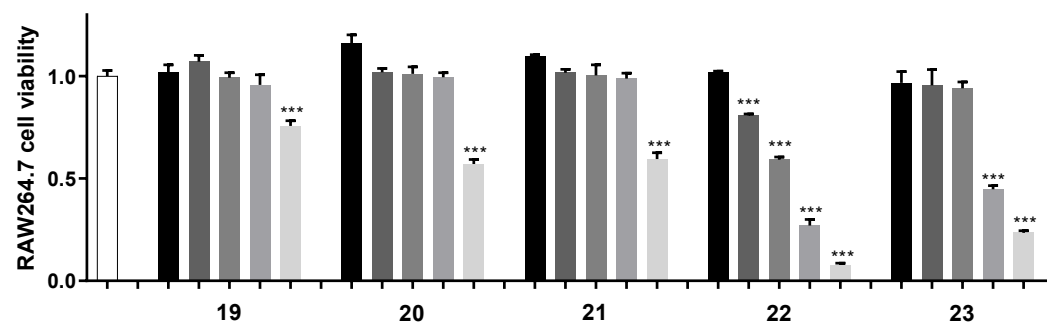

657

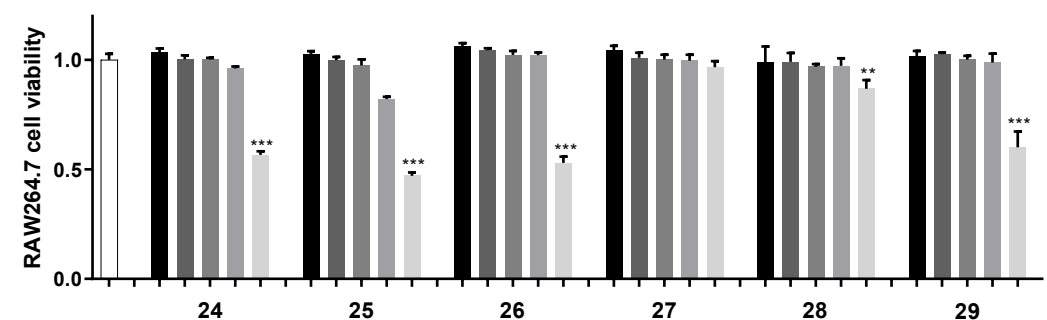

658

659

**Fig. S98.** The MTT assay compounds 1–29 at 1, 5, 10, 25 and 50  $\mu\text{M}$

660 N: normal group without tested samples. Values represent the mean  $\pm$  SD of six determinations.

661 \*\* $P < 0.01$ , \*\*\* $P < 0.001$  (Differences between compound-treated group and normal group).  $n = 6$ .

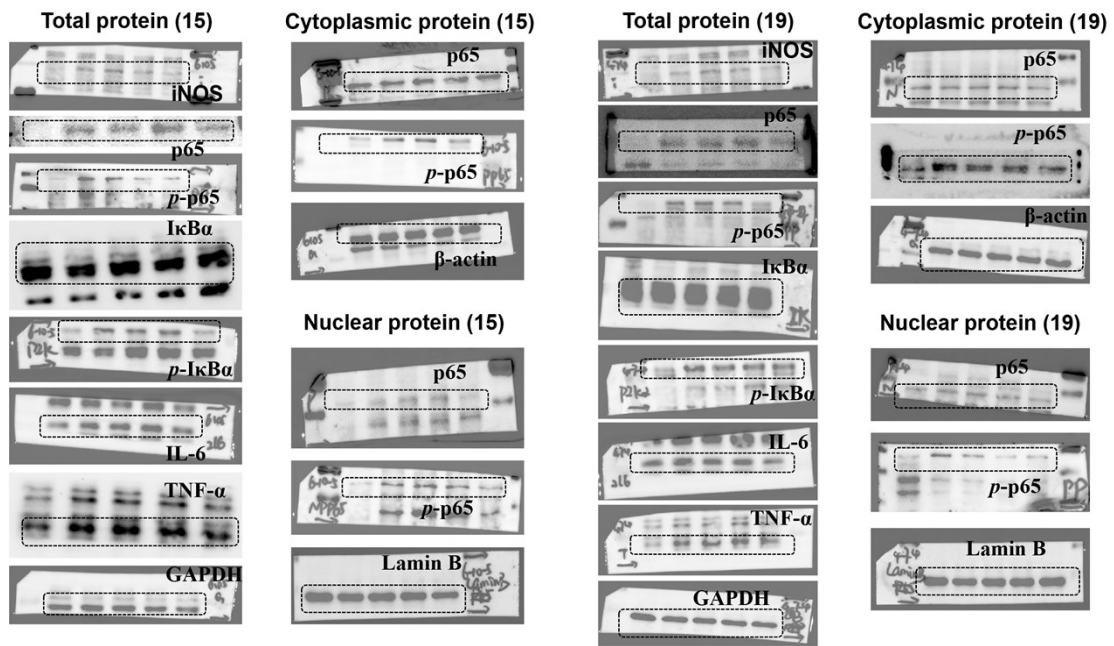

663

664

**Fig. S99.** The raw data of Fig. 3

Tab. S1. <sup>13</sup>C-NMR data for 2–11

| No.                | 2 <sup>a</sup> | 3 <sup>b</sup> | 4 <sup>b</sup> | 5 <sup>c</sup> | 6 <sup>b</sup> | 7 <sup>b</sup> | 8 <sup>b</sup> | 9 <sup>b</sup> | 10 <sup>b</sup> | 11 <sup>b</sup> |
|--------------------|----------------|----------------|----------------|----------------|----------------|----------------|----------------|----------------|-----------------|-----------------|
| 1                  | 39.6           | 39.5           | 48.2           | 38.2           | 45.0           | 48.9           | 34.2           | 67.0           | 66.3            | 39.1            |
| 2                  | 34.2           | 28.3           | 68.8           | 27.1           | 73.8           | 66.5           | 29.8           | 178.1          | 175.9           | 34.4            |
| 3                  | 218.1          | 78.1           | 83.7           | 76.7           | 79.9           | 84.9           | 177.3          | 84.7           | 84.6            | 216.0           |
| 4                  | 47.4           | 39.4           | 39.9           | 38.4           | 40.5           | 39.7           | 25.7           | 43.5           | 43.4            | 47.4            |
| 5                  | 55.0           | 55.9           | 56.0           | 54.8           | 55.8           | 55.6           | 47.4           | 57.0           | 57.2            | 55.4            |
| 6                  | 19.7           | 18.8           | 18.8           | 17.9           | 18.8           | 18.6           | 18.6           | 19.1           | 19.0            | 19.8            |
| 7                  | 33.7           | 34.8           | 34.8           | 33.9           | 32.9           | 34.6           | 33.4           | 34.7           | 34.5            | 32.6            |
| 8                  | 40.7           | 41.1           | 41.2           | 42.2           | 41.1           | 41.1           | 40.8           | 43.9           | 43.8            | 39.6            |
| 9                  | 49.9           | 51.0           | 51.0           | 49.9           | 50.9           | 50.8           | 41.2           | 45.1           | 45.0            | 47.2            |
| 10                 | 37.1           | 37.5           | 38.7           | 38.4           | 38.8           | 38.6           | 40.2           | 49.7           | 49.7            | 36.9            |
| 11                 | 21.4           | 21.2           | 21.3           | 20.5           | 21.3           | 21.3           | 22.0           | 24.2           | 24.0            | 23.8            |
| 12                 | 25.6           | 26.1           | 26.0           | 26.1           | 26.1           | 26.0           | 26.1           | 26.3           | 26.1            | 122.3           |
| 13                 | 38.5           | 38.6           | 38.6           | 37.4           | 38.6           | 38.5           | 38.7           | 39.1           | 39.0            | 144.9           |
| 14                 | 42.5           | 42.8           | 42.9           | 40.2           | 42.9           | 42.9           | 43.3           | 42.1           | 42.1            | 42.2            |
| 15                 | 29.8           | 30.3           | 30.2           | 29.2           | 30.2           | 30.2           | 30.3           | 30.5           | 30.5            | 28.3            |
| 16                 | 32.3           | 32.9           | 32.9           | 31.7           | 32.9           | 32.8           | 32.9           | 33.0           | 32.9            | 23.7            |
| 17                 | 56.4           | 56.6           | 56.6           | 55.4           | 56.6           | 56.6           | 56.8           | 56.6           | 56.7            | 46.7            |
| 18                 | 49.3           | 49.8           | 49.8           | 48.8           | 49.8           | 49.7           | 49.7           | 49.7           | 49.7            | 42.1            |
| 19                 | 46.9           | 47.8           | 47.8           | 41.9           | 47.8           | 47.8           | 47.8           | 47.6           | 47.7            | 46.4            |
| 20                 | 150.6          | 151.3          | 151.3          | 155.5          | 151.4          | 151.3          | 151.5          | 151.2          | 151.2           | 31.0            |
| 21                 | 30.7           | 31.2           | 31.2           | 28.6           | 31.2           | 31.2           | 31.3           | 31.3           | 31.3            | 34.2            |
| 22                 | 37.0           | 37.6           | 37.6           | 36.2           | 37.7           | 37.6           | 37.6           | 37.6           | 37.6            | 33.2            |
| 23                 | 26.7           | 28.7           | 29.2           | 28.0           | 29.1           | 28.9           | 24.9           | 31.5           | 31.5            | 26.6            |
| 24                 | 21.0           | 16.4           | 17.4           | 15.7           | 16.3           | 18.0           | 19.1           | 20.4           | 20.2            | 21.6            |
| 25                 | 15.9           | 16.4           | 17.7           | 15.9           | 17.4           | 17.6           | 20.0           | 18.8           | 18.6            | 14.9            |
| 26                 | 16.0           | 16.4           | 16.5           | 15.9           | 17.4           | 16.4           | 16.4           | 17.0           | 17.0            | 17.2            |
| 27                 | 14.6           | 14.9           | 14.9           | 14.3           | 14.9           | 14.9           | 14.8           | 15.1           | 15.0            | 26.0            |
| 28                 | 180.3          | 179.0          | 179.1          | 177.2          | 179.0          | 179.0          | 179.4          | 178.9          | 179.0           | 180.2           |
| 29                 | 19.4           | 19.5           | 19.5           | 62.8           | 19.4           | 19.4           | 19.5           | 19.6           | 19.5            | 33.3            |
| 30                 | 109.6          | 110.0          | 109.9          | 105.3          | 110.0          | 110.0          | 110.0          | 109.8          | 109.9           | 23.7            |
| 2-OCH <sub>3</sub> |                |                |                |                |                |                |                |                | 51.1            |                 |
| 1'                 |                |                |                |                | 126.2          | 126.7          |                |                |                 |                 |
| 2'                 |                |                |                |                | 130.6          | 133.8          |                |                |                 |                 |
| 3'                 |                |                |                |                | 116.9          | 115.9          |                |                |                 |                 |
| 4'                 |                |                |                |                | 161.4          | 160.5          |                |                |                 |                 |
| 5'                 |                |                |                |                | 116.9          | 115.9          |                |                |                 |                 |
| 6'                 |                |                |                |                | 130.6          | 133.8          |                |                |                 |                 |
| 7'                 |                |                |                |                | 144.7          | 143.6          |                |                |                 |                 |
| 8'                 |                |                |                |                | 116.0          | 117.1          |                |                |                 |                 |
| 9'                 |                |                |                |                | 167.5          | 167.2          |                |                |                 |                 |

667 <sup>a</sup> CDCl<sub>3</sub>; <sup>b</sup> C<sub>5</sub>D<sub>5</sub>N; <sup>c</sup> DMSO-*d*<sub>6</sub>; <sup>d</sup> CD<sub>3</sub>OD

Tab. S2. <sup>13</sup>C-NMR data for 12–20

| No. | 12 <sup>b</sup> | 13 <sup>b</sup> | 14 <sup>d</sup> | 15 <sup>c</sup> | 16 <sup>c</sup> | 17 <sup>b</sup> | 18 <sup>b</sup> | 19 <sup>b</sup> | 20 <sup>b</sup> |
|-----|-----------------|-----------------|-----------------|-----------------|-----------------|-----------------|-----------------|-----------------|-----------------|
| 1   | 39.0            | 47.7            | 48.5            | 43.4            | 43.4            | 48.3            | 34.1            | 39.3            | 39.1            |
| 2   | 28.1            | 68.6            | 69.2            | 71.8            | 71.8            | 66.4            | 29.8            | 34.3            | 28.1            |
| 3   | 78.1            | 83.8            | 84.2            | 78.2            | 78.2            | 85.0            | 177.3           | 216.1           | 78.1            |
| 4   | 39.4            | 39.8            | 40.6            | 40.7            | 40.9            | 39.8            | 25.3            | 47.1            | 39.4            |
| 5   | 55.8            | 55.9            | 56.2            | 54.2            | 54.2            | 55.5            | 47.9            | 55.3            | 55.8            |
| 6   | 18.8            | 18.8            | 18.7            | 18.0            | 18.0            | 18.7            | 18.5            | 19.8            | 18.8            |
| 7   | 33.2            | 33.2            | 34.0            | 32.1            | 32.1            | 33.0            | 32.2            | 32.9            | 33.6            |
| 8   | 39.8            | 39.8            | 45.1            | 39.2            | 38.8            | 39.8            | 39.6            | 39.8            | 40.0            |
| 9   | 48.2            | 48.1            | 63.0            | 46.7            | 46.7            | 48.0            | 38.4            | 47.3            | 48.1            |
| 10  | 37.4            | 38.5            | 39.4            | 37.7            | 37.7            | 38.4            | 40.2            | 36.8            | 37.5            |
| 11  | 23.9            | 23.9            | 202.7           | 23.2            | 23.2            | 23.9            | 24.1            | 23.7            | 23.7            |
| 12  | 122.6           | 122.4           | 128.3           | 121.2           | 121.2           | 122.3           | 122.7           | 125.4           | 125.7           |
| 13  | 144.9           | 144.8           | 173.1           | 143.9           | 143.9           | 145.0           | 144.8           | 139.3           | 140.1           |
| 14  | 42.2            | 42.2            | 46.5            | 41.3            | 41.3            | 42.2            | 42.7            | 42.5            | 42.5            |
| 15  | 28.4            | 28.3            | 28.9            | 27.1            | 27.1            | 28.3            | 28.4            | 28.6            | 28.7            |
| 16  | 23.7            | 23.7            | 24.0            | 22.8            | 22.8            | 23.7            | 23.8            | 24.9            | 24.9            |
| 17  | 46.7            | 46.6            | 47.3            | 45.6            | 45.6            | 46.7            | 46.8            | 48.1            | 48.1            |
| 18  | 42.1            | 42.0            | 43.5            | 41.3            | 40.9            | 42.0            | 42.1            | 53.6            | 53.6            |
| 19  | 46.5            | 46.5            | 45.7            | 45.3            | 45.3            | 46.5            | 46.5            | 39.5            | 39.5            |
| 20  | 31.0            | 30.9            | 31.7            | 30.3            | 30.0            | 31.0            | 31.0            | 39.4            | 39.4            |
| 21  | 34.3            | 34.2            | 34.8            | 33.2            | 33.2            | 34.3            | 34.3            | 31.1            | 31.1            |
| 22  | 33.2            | 33.2            | 33.0            | 32.0            | 32.1            | 33.2            | 33.2            | 37.4            | 37.3            |
| 23  | 28.8            | 29.3            | 29.3            | 28.5            | 28.4            | 29.0            | 24.9            | 26.7            | 28.8            |
| 24  | 16.6            | 17.6            | 17.5            | 16.9            | 16.7            | 18.3            | 19.1            | 21.6            | 16.6            |
| 25  | 15.6            | 16.8            | 18.0            | 16.0            | 16.0            | 16.8            | 19.5            | 15.1            | 15.7            |
| 26  | 17.5            | 17.5            | 19.9            | 16.7            | 16.9            | 17.4            | 17.6            | 17.3            | 17.5            |
| 27  | 26.2            | 26.2            | 24.0            | 25.5            | 25.5            | 26.2            | 26.0            | 23.7            | 23.9            |
| 28  | 180.3           | 180.2           | 181.4           | 178.7           | 179.7           | 180.5           | 180.5           | 179.8           | 180.0           |
| 29  | 33.3            | 33.3            | 33.3            | 32.7            | 32.7            | 33.3            | 33.3            | 17.5            | 17.6            |
| 30  | 23.8            | 23.8            | 23.8            | 23.3            | 23.3            | 23.8            | 23.8            | 21.4            | 21.4            |
| 1'  |                 |                 |                 | 125.1           | 125.8           | 126.2           |                 |                 |                 |
| 2'  |                 |                 |                 | 130.0           | 132.5           | 130.6           |                 |                 |                 |
| 3'  |                 |                 |                 | 115.7           | 114.7           | 116.8           |                 |                 |                 |
| 4'  |                 |                 |                 | 159.6           | 159.2           | 161.4           |                 |                 |                 |
| 5'  |                 |                 |                 | 115.7           | 114.7           | 116.8           |                 |                 |                 |
| 6'  |                 |                 |                 | 130.0           | 132.5           | 130.6           |                 |                 |                 |
| 7'  |                 |                 |                 | 144.0           | 142.3           | 144.8           |                 |                 |                 |
| 8'  |                 |                 |                 | 114.9           | 116.2           | 116.0           |                 |                 |                 |
| 9'  |                 |                 |                 | 166.3           | 166.3           | 167.9           |                 |                 |                 |

Tab. S3. <sup>13</sup>C-NMR data for 21–29

| No. | 21 <sup>b</sup> | 22 <sup>b</sup> | 23 <sup>b</sup> | 24 <sup>b</sup> | 25 <sup>b</sup> | 26 <sup>b</sup> | 27 <sup>b</sup> | 28 <sup>b</sup> | 29 <sup>b</sup> |
|-----|-----------------|-----------------|-----------------|-----------------|-----------------|-----------------|-----------------|-----------------|-----------------|
| 1   | 47.9            | 48.6            | 34.3            | 39.2            | 39.0            | 53.7            | 42.9            | 45.0            | 42.4            |
| 2   | 68.6            | 66.4            | 29.9            | 34.4            | 28.2            | 211.2           | 66.1            | 71.5            | 174.5           |
| 3   | 83.8            | 85.1            | 177.3           | 216.5           | 78.2            | 83.5            | 79.4            | 78.5            | 182.4           |
| 4   | 39.8            | 39.8            | 25.4            | 47.5            | 39.4            | 45.8            | 38.8            | 38.8            | 46.9            |
| 5   | 55.9            | 55.6            | 47.9            | 55.5            | 55.9            | 54.9            | 48.8            | 56.1            | 48.9            |
| 6   | 18.8            | 18.7            | 18.6            | 19.9            | 19.0            | 19.2            | 18.6            | 18.8            | 22.1            |
| 7   | 33.5            | 33.4            | 31.2            | 33.0            | 33.7            | 33.2            | 33.5            | 33.7            | 33.0            |
| 8   | 40.0            | 40.0            | 39.8            | 40.2            | 40.4            | 42.3            | 40.6            | 40.5            | 40.5            |
| 9   | 48.1            | 48.0            | 38.2            | 46.9            | 47.8            | 47.4            | 47.6            | 48.2            | 39.5            |
| 10  | 38.4            | 38.3            | 40.1            | 36.9            | 37.4            | 40.7            | 38.7            | 37.3            | 48.4            |
| 11  | 23.9            | 23.7            | 24.1            | 24.0            | 24.1            | 23.9            | 24.1            | 24.2            | 24.5            |
| 12  | 125.5           | 125.4           | 125.8           | 127.8           | 128.0           | 127.4           | 127.9           | 128.2           | 128.5           |
| 13  | 139.3           | 139.6           | 139.3           | 140.0           | 140.1           | 140.2           | 140.0           | 140.0           | 139.7           |
| 14  | 42.5            | 42.6            | 43.1            | 42.2            | 42.2            | 43.7            | 42.2            | 42.3            | 42.7            |
| 15  | 28.6            | 28.7            | 28.7            | 29.3            | 29.4            | 29.5            | 29.3            | 29.3            | 29.4            |
| 16  | 24.9            | 24.9            | 25.0            | 26.4            | 26.5            | 26.4            | 26.4            | 26.4            | 26.6            |
| 17  | 48.0            | 48.1            | 48.1            | 48.3            | 48.4            | 48.3            | 48.3            | 48.3            | 48.4            |
| 18  | 53.5            | 53.6            | 53.7            | 54.7            | 54.7            | 54.6            | 54.6            | 54.7            | 54.7            |
| 19  | 39.5            | 39.5            | 39.6            | 72.7            | 72.7            | 72.7            | 72.7            | 72.7            | 72.7            |
| 20  | 39.4            | 39.4            | 39.4            | 42.4            | 42.4            | 42.4            | 42.4            | 42.4            | 42.3            |
| 21  | 31.1            | 31.1            | 32.5            | 26.9            | 27.0            | 27.0            | 27.0            | 27.0            | 26.9            |
| 22  | 37.4            | 37.5            | 37.5            | 38.5            | 38.6            | 38.5            | 38.6            | 38.6            | 38.5            |
| 23  | 29.4            | 29.0            | 24.9            | 26.6            | 28.8            | 29.3            | 29.5            | 30.3            | 27.6            |
| 24  | 17.7            | 18.3            | 19.7            | 21.6            | 16.6            | 16.8            | 22.3            | 18.2            | 25.0            |
| 25  | 17.0            | 16.8            | 19.7            | 15.0            | 15.6            | 16.4            | 16.7            | 16.7            | 19.6            |
| 26  | 17.5            | 17.4            | 17.7            | 17.0            | 17.3            | 17.3            | 17.3            | 17.3            | 17.3            |
| 27  | 23.7            | 24.0            | 23.8            | 24.5            | 24.7            | 24.6            | 24.6            | 24.8            | 24.3            |
| 28  | 179.9           | 180.3           | 180.2           | 180.8           | 180.9           | 180.7           | 181.1           | 180.8           | 180.9           |
| 29  | 17.5            | 17.5            | 17.7            | 27.1            | 27.2            | 27.1            | 27.1            | 27.1            | 27.2            |
| 30  | 21.4            | 21.4            | 21.4            | 16.8            | 16.8            | 16.8            | 16.8            | 16.8            | 16.7            |
| 1'  |                 | 126.3           |                 |                 |                 |                 |                 |                 |                 |
| 2'  |                 | 130.6           |                 |                 |                 |                 |                 |                 |                 |
| 3'  |                 | 116.8           |                 |                 |                 |                 |                 |                 |                 |
| 4'  |                 | 161.4           |                 |                 |                 |                 |                 |                 |                 |
| 5'  |                 | 116.8           |                 |                 |                 |                 |                 |                 |                 |
| 6'  |                 | 130.6           |                 |                 |                 |                 |                 |                 |                 |
| 7'  |                 | 144.8           |                 |                 |                 |                 |                 |                 |                 |
| 8'  |                 | 116.1           |                 |                 |                 |                 |                 |                 |                 |
| 9'  |                 | 167.9           |                 |                 |                 |                 |                 |                 |                 |



677  
678  
679

**Tab. S4.** Comparison  $^1\text{H}$  and  $^{13}\text{C}$  NMR chemical shifts of maslinic acid, augustic acid, bredemolic acid and 3-*epi*-maslinic acid

|                               | <b>Maslinic acid<br/>(2<math>\alpha</math>3<math>\beta</math>)</b> | <b>3-<i>epi</i>-Maslinic acid<br/>(2<math>\alpha</math>3<math>\alpha</math>)</b> | <b>Bredemolic acid<br/>(2<math>\beta</math>3<math>\alpha</math>)</b> | <b>Augustic acid<br/>(2<math>\beta</math>3<math>\beta</math>)</b> |
|-------------------------------|--------------------------------------------------------------------|----------------------------------------------------------------------------------|----------------------------------------------------------------------|-------------------------------------------------------------------|
| $\delta_{\text{H-2}}$         | 4.11                                                               | 4.21                                                                             | 4.36                                                                 | 4.41                                                              |
| $\delta_{\text{H-3}}$         | 3.41                                                               | 3.77                                                                             | 4.00                                                                 | 3.44                                                              |
| $\Delta\delta_{\text{H2-H3}}$ | 0.7                                                                | 0.56                                                                             | 0.36                                                                 | 0.97                                                              |
| $J_{\text{H2,3}}$             | 9.4                                                                | 2.6                                                                              | 7.5                                                                  | 4.0                                                               |
| $\delta_{\text{C-2}}$         | 69.0                                                               | 66.5                                                                             | 71.1                                                                 | 71.8                                                              |
| $\delta_{\text{C-3}}$         | 84.3                                                               | 79.7                                                                             | 78.7                                                                 | 78.7                                                              |
| $\Delta\delta_{\text{C3-C2}}$ | 15.3                                                               | 13.2                                                                             | 7.6                                                                  | 6.9                                                               |

680
